# Supplementary material for: Weighted Gene Correlation Network Analysis Identifies Specific Functional Modules and Genes in Esophageal Cancer
Source: Hindawi journal article supplement (doi:10.1155/2021/8223263), 2021-12-27
Supplement: f1 [file 8223263.f1.zip]

Supplementary table 2. The detailed information of DEGs between ESCA tumors and normal tissues in the GSE38129 dataset.

| ID       | logFC        | AveExpr     | t            | P.Value  |
|----------|--------------|-------------|--------------|----------|
| CBX3     | 1.331228899  | 9.958653025 | 14.03779012  | 1.21E-20 |
| UBL3     | -2.030601532 | 8.578042781 | -11.93958966 | 1.63E-17 |
| KAT2B    | -2.563703751 | 7.867239397 | -11.58020464 | 5.93E-17 |
| KIF4A    | 2.148217187  | 6.449535255 | 11.18479926  | 2.50E-16 |
| AURKA    | 1.443287248  | 6.087479091 | 11.16957811  | 2.64E-16 |
| LMBRD1   | -1.122055508 | 9.213949725 | -11.04764967 | 4.13E-16 |
| MGLL     | -2.611752339 | 8.893340468 | -10.74752476 | 1.25E-15 |
| CKS1B    | 1.712048368  | 9.298659768 | 10.68949203  | 1.55E-15 |
| ECT2     | 2.377331671  | 8.231403615 | 10.56514512  | 2.47E-15 |
| ATAD2    | 2.064620715  | 6.39610046  | 10.52121921  | 2.91E-15 |
| MTHFD2   | 1.691287016  | 9.471645411 | 10.44043819  | 3.93E-15 |
| RFC4     | 1.891903453  | 7.924993867 | 10.43255127  | 4.05E-15 |
| HOXB7    | 1.951657231  | 6.759270724 | 10.36584245  | 5.20E-15 |
| KIF14    | 2.030790078  | 6.351845982 | 10.35818041  | 5.35E-15 |
| GPX3     | -2.95508115  | 9.251858829 | -10.31693413 | 6.25E-15 |
| NUP107   | 1.177295036  | 8.505752244 | 10.22225198  | 8.93E-15 |
| CRYL1    | -1.511701519 | 7.378811852 | -10.21788167 | 9.08E-15 |
| COL10A1  | 3.060733685  | 5.781788467 | 10.10431869  | 1.39E-14 |
| HMGB3    | 1.568979544  | 7.636900656 | 10.05154406  | 1.70E-14 |
| TRIP13   | 2.071615013  | 7.456765596 | 9.999610834  | 2.07E-14 |
| EPB41L3  | -2.731519849 | 6.08888013  | -9.99717496  | 2.09E-14 |
| CITED2   | -2.383849681 | 7.163797692 | -9.971366591 | 2.31E-14 |
| HSDL2    | -1.103290626 | 6.667678223 | -9.830806918 | 3.94E-14 |
| MCM2     | 1.843571631  | 7.794251654 | 9.818282301  | 4.13E-14 |
| WDHD1    | 1.251791032  | 4.73493224  | 9.757321546  | 5.21E-14 |
| ANP32E   | 1.109652266  | 8.581373532 | 9.737427286  | 5.62E-14 |
| RAD51AP1 | 1.999907677  | 6.946766731 | 9.727665722  | 5.83E-14 |
| NCAPG2   | 1.314428319  | 6.268924231 | 9.714824449  | 6.13E-14 |
| LAPTM4B  | 1.600733221  | 9.6398827   | 9.699786297  | 6.49E-14 |
| MCM7     | 1.343222271  | 8.290675799 | 9.671179301  | 7.24E-14 |
| GPD1L    | -1.925523854 | 8.334032583 | -9.667726024 | 7.33E-14 |
| FANCI    | 1.698161892  | 7.015870553 | 9.623036026  | 8.70E-14 |
| CPEB3    | -1.837359279 | 5.585502305 | -9.618662377 | 8.85E-14 |
| ID4      | -1.870596685 | 7.988699423 | -9.615599181 | 8.95E-14 |
| FCER1A   | -2.336942913 | 5.77490647  | -9.53496187  | 1.22E-13 |
| COL11A1  | 3.884311814  | 6.064270499 | 9.493765322  | 1.43E-13 |
| MAD2L1   | 1.849288198  | 7.693125957 | 9.491301325  | 1.44E-13 |
| SOX4     | 1.522042503  | 7.737989362 | 9.489229678  | 1.45E-13 |
| PHACTR2  | -1.238560621 | 7.748320023 | -9.434054336 | 1.80E-13 |
| DNMT3B   | 1.57072225   | 6.251373842 | 9.429395558  | 1.83E-13 |
| NDC80    | 1.77514691   | 6.820648358 | 9.40501013   | 2.01E-13 |
| NEK2     | 1.310309463  | 5.438693873 | 9.401563757  | 2.04E-13 |
| KIF2C    | 1.434240993  | 6.489793326 | 9.387672912  | 2.15E-13 |
| MTERF3   | 1.111225813  | 8.589698008 | 9.37902462   | 2.22E-13 |
| ETFDH    | -1.553081314 | 6.382993197 | -9.373112232 | 2.27E-13 |
| HIGD1A   | -1.096257414 | 10.26454098 | -9.311089151 | 2.89E-13 |
| KIF23    | 2.123586008  | 5.795187593 | 9.301554979  | 2.99E-13 |
| FBXO3    | -1.430927989 | 7.892802577 | -9.29757497  | 3.04E-13 |
| TFRC     | 1.937885927  | 10.49219965 | 9.242692649  | 3.76E-13 |

|           |              |             |              |          |
|-----------|--------------|-------------|--------------|----------|
| POLR2H    | 1.026190036  | 9.226265476 | 9.240284443  | 3.79E-13 |
| KANK1     | -1.779757308 | 8.759138586 | -9.211616376 | 4.24E-13 |
| DMXL1     | -1.236036723 | 7.807989175 | -9.199473174 | 4.44E-13 |
| ABLIM3    | -1.910183929 | 6.859519295 | -9.164557608 | 5.08E-13 |
| NUCB2     | -1.99248837  | 9.320540237 | -9.108416413 | 6.32E-13 |
| UBE2C     | 1.964888916  | 8.462607958 | 9.097093262  | 6.60E-13 |
| ACTL6A    | 1.386138729  | 9.107541247 | 9.096270518  | 6.62E-13 |
| CDKN3     | 1.881868597  | 6.973633812 | 9.085009761  | 6.92E-13 |
| KIF20A    | 1.830122998  | 6.862969558 | 9.071903997  | 7.28E-13 |
| SPAG5     | 1.398466788  | 7.406635418 | 9.0626328    | 7.54E-13 |
| ABLIM1    | -1.758949662 | 8.98989519  | -9.040081656 | 8.23E-13 |
| PAIP2B    | -1.598908272 | 6.628047599 | -9.020560579 | 8.88E-13 |
| GINS2     | 1.665380593  | 7.492074071 | 9.012617339  | 9.16E-13 |
| FZD6      | 1.393668995  | 9.042498696 | 8.999663572  | 9.63E-13 |
| CENPF     | 1.272963655  | 5.645921882 | 8.994379728  | 9.83E-13 |
| PPP1R3C   | -3.1315022   | 8.489420407 | -8.988501481 | 1.01E-12 |
| PINK1     | -1.051417563 | 7.865421145 | -8.974752617 | 1.06E-12 |
| STMN1     | 1.156614513  | 7.87191318  | 8.958867144  | 1.13E-12 |
| ARHGAP10  | -1.086167194 | 7.028113773 | -8.952186496 | 1.16E-12 |
| EXO1      | 1.397239893  | 5.784787258 | 8.929088631  | 1.27E-12 |
| HOXA10    | 1.654377361  | 5.801448885 | 8.921365635  | 1.31E-12 |
| DNMT1     | 1.051677274  | 8.215343093 | 8.90892181   | 1.37E-12 |
| YEATS2    | 1.143049407  | 7.180458893 | 8.859805297  | 1.66E-12 |
| CRIP2     | -1.735606937 | 7.760391264 | -8.856266979 | 1.68E-12 |
| CDK1      | 2.041154561  | 7.746036841 | 8.84145423   | 1.78E-12 |
| NUP155    | 1.074701128  | 6.504719152 | 8.828450777  | 1.87E-12 |
| TBC1D31   | 1.076212509  | 5.882867963 | 8.81767237   | 1.95E-12 |
| BID       | 1.704426302  | 6.527653639 | 8.790886648  | 2.17E-12 |
| SPP1      | 4.45474537   | 7.205695827 | 8.766574248  | 2.38E-12 |
| PLAU      | 1.912233614  | 6.899629305 | 8.75280162   | 2.52E-12 |
| TPX2      | 1.944996758  | 7.525574808 | 8.694016386  | 3.16E-12 |
| TOP2A     | 2.182972383  | 8.355378728 | 8.662807904  | 3.57E-12 |
| ARHGEF10L | -1.207885162 | 7.357862142 | -8.657167514 | 3.65E-12 |
| SPC25     | 1.764318253  | 5.504149205 | 8.650739017  | 3.75E-12 |
| FSCN1     | 1.72526339   | 7.16457589  | 8.619614427  | 4.23E-12 |
| FOXM1     | 1.792870614  | 6.484733218 | 8.612614933  | 4.35E-12 |
| DLGAP5    | 2.161649362  | 6.639119474 | 8.597367462  | 4.62E-12 |
| PRIM2     | 1.04710497   | 4.60800327  | 8.586799268  | 4.81E-12 |
| KPNA2     | 1.320849102  | 9.964037523 | 8.581236415  | 4.92E-12 |
| TRIM13    | -1.062555007 | 7.718443579 | -8.578814702 | 4.96E-12 |
| HPGD      | -3.040951021 | 7.236054163 | -8.5632749   | 5.27E-12 |
| PTDSS1    | 1.070444299  | 9.39451385  | 8.548790734  | 5.58E-12 |
| PCNA      | 1.267140499  | 10.05406125 | 8.544493791  | 5.67E-12 |
| KIF18B    | 1.348295014  | 7.098571788 | 8.542809986  | 5.71E-12 |
| CENPE     | 1.395878826  | 6.190682377 | 8.538481197  | 5.81E-12 |
| MFAP2     | 2.219687645  | 7.48049866  | 8.519842043  | 6.25E-12 |
| LRP10     | -1.28568362  | 10.11784868 | -8.514518886 | 6.38E-12 |
| PMM1      | -1.358719416 | 7.293884393 | -8.51127865  | 6.46E-12 |
| DSN1      | 1.044909795  | 6.733472702 | 8.463678289  | 7.79E-12 |
| CDC6      | 1.720174381  | 5.025621197 | 8.461140814  | 7.86E-12 |
| MMP1      | 4.849064064  | 6.646083476 | 8.459786342  | 7.90E-12 |
| CEP55     | 2.239081941  | 6.938868582 | 8.405865453  | 9.76E-12 |
| MCM6      | 1.126931379  | 9.140718591 | 8.405541789  | 9.78E-12 |

|           |              |             |              |          |
|-----------|--------------|-------------|--------------|----------|
| SNAI2     | 1.765878198  | 8.296516871 | 8.39344785   | 1.03E-11 |
| TOPBP1    | 1.083370823  | 8.488398316 | 8.392430176  | 1.03E-11 |
| KIAA0232  | -1.122221964 | 8.917634723 | -8.38913703  | 1.04E-11 |
| PRC1      | 1.843624188  | 8.013505648 | 8.353519647  | 1.20E-11 |
| AMOTL2    | -1.212124458 | 8.808587699 | -8.352763301 | 1.20E-11 |
| MMP11     | 1.647625208  | 6.425171384 | 8.328639633  | 1.32E-11 |
| CDCA3     | 1.161807784  | 6.676258368 | 8.316937679  | 1.38E-11 |
| FEN1      | 1.231621687  | 7.302268307 | 8.306125556  | 1.44E-11 |
| FAM63A    | -1.301283783 | 7.62547249  | -8.291039115 | 1.53E-11 |
| HOXC10    | 1.775549298  | 5.80418242  | 8.28548332   | 1.57E-11 |
| AHNAK     | -1.379715876 | 8.932513285 | -8.282695347 | 1.58E-11 |
| NUDT1     | 1.083344835  | 7.476621686 | 8.25522824   | 1.76E-11 |
| RNASEH2A  | 1.219402439  | 7.9574162   | 8.244903317  | 1.84E-11 |
| MMP12     | 3.499963223  | 7.083476808 | 8.227888869  | 1.96E-11 |
| ADIRF     | -2.082099999 | 9.769580865 | -8.21667932  | 2.05E-11 |
| PBK       | 2.024753553  | 7.012561637 | 8.214300191  | 2.07E-11 |
| CKS2      | 1.721199304  | 9.731536656 | 8.207643965  | 2.12E-11 |
| RPL39L    | 1.733639974  | 6.005164297 | 8.205197666  | 2.15E-11 |
| SUCLG2    | -1.229557418 | 8.592773261 | -8.137031484 | 2.80E-11 |
| FZD2      | 1.186267112  | 5.918309916 | 8.135855461  | 2.82E-11 |
| LRRFIP2   | -1.144402784 | 7.62790831  | -8.115064618 | 3.06E-11 |
| STIL      | 1.65515133   | 6.722003614 | 8.106056638  | 3.17E-11 |
| UNC13B    | -1.09005733  | 7.826523004 | -8.075888007 | 3.57E-11 |
| SLC38A6   | 1.422093172  | 6.212035236 | 8.046522125  | 4.00E-11 |
| GTSE1     | 1.071905444  | 6.602064572 | 8.042613774  | 4.06E-11 |
| ACAA1     | -1.023672726 | 8.18406946  | -8.039490059 | 4.11E-11 |
| HSPE1     | 1.227921013  | 9.690271269 | 8.034081011  | 4.20E-11 |
| VRK1      | 1.10383744   | 7.646006136 | 8.027769491  | 4.31E-11 |
| ACOX3     | -1.149448274 | 6.998862258 | -8.021805568 | 4.41E-11 |
| KIF18A    | 1.289722525  | 5.032435496 | 7.996697153  | 4.87E-11 |
| DPY19L4   | 1.040023628  | 7.423186968 | 7.970026593  | 5.41E-11 |
| SECISBP2L | -1.214479002 | 7.653138253 | -7.967207165 | 5.47E-11 |
| CDK4      | 1.309109764  | 9.103198681 | 7.965764357  | 5.50E-11 |
| RAD54L    | 1.226768625  | 6.707540411 | 7.964682124  | 5.52E-11 |
| PALMD     | -1.702596623 | 7.670971071 | -7.955977545 | 5.71E-11 |
| SASH1     | -1.936804445 | 8.961847944 | -7.944722051 | 5.97E-11 |
| CDC45     | 1.170829253  | 6.421416085 | 7.916242872  | 6.68E-11 |
| DNA2      | 1.201962125  | 6.072763622 | 7.90689208   | 6.93E-11 |
| GALNT12   | -2.150324049 | 7.712551781 | -7.905765228 | 6.96E-11 |
| KIF15     | 1.395521255  | 5.652239539 | 7.896495776  | 7.22E-11 |
| BLM       | 1.542566353  | 6.490299903 | 7.890986896  | 7.38E-11 |
| C1orf112  | 1.204744893  | 5.080115784 | 7.873609485  | 7.90E-11 |
| HEY1      | 2.042527537  | 7.542494614 | 7.851738986  | 8.61E-11 |
| AURKB     | 1.686887785  | 6.647795914 | 7.832944645  | 9.27E-11 |
| FBXO5     | 1.190654052  | 6.246732923 | 7.825223188  | 9.56E-11 |
| MEST      | 2.238179245  | 8.43822802  | 7.811601591  | 1.01E-10 |
| CAST      | -1.125036301 | 8.503275822 | -7.804347751 | 1.04E-10 |
| MYBL2     | 1.098020742  | 6.844155274 | 7.781736309  | 1.13E-10 |
| COL1A1    | 1.490466677  | 7.359120994 | 7.765974784  | 1.21E-10 |
| SLC20A1   | 1.297269795  | 8.488773613 | 7.743354111  | 1.32E-10 |
| CHEK1     | 1.153427512  | 4.774564659 | 7.716136187  | 1.47E-10 |
| CDC25B    | 1.245855008  | 8.566710574 | 7.712664494  | 1.49E-10 |
| HSPD1     | 1.302053146  | 10.75585763 | 7.711288492  | 1.50E-10 |

|          |              |             |              |          |
|----------|--------------|-------------|--------------|----------|
| SPAG16   | -1.453127811 | 7.629466798 | -7.684576282 | 1.66E-10 |
| ILF2     | 1.113459243  | 9.282057171 | 7.677816016  | 1.71E-10 |
| LMO2     | -1.074275927 | 7.075510364 | -7.676001714 | 1.72E-10 |
| PDLIM2   | -1.487907747 | 7.715431895 | -7.673256008 | 1.74E-10 |
| CCNB2    | 1.763233697  | 8.060811346 | 7.665701597  | 1.79E-10 |
| CENPN    | 1.4295236    | 6.180476131 | 7.660996552  | 1.83E-10 |
| HSPB8    | -2.300739903 | 9.460699253 | -7.656948614 | 1.86E-10 |
| GIN51    | 1.808074328  | 7.75859993  | 7.655185299  | 1.87E-10 |
| THBS2    | 1.843128844  | 8.267615452 | 7.650935292  | 1.90E-10 |
| RACGAP1  | 1.088154936  | 8.736356681 | 7.649634041  | 1.91E-10 |
| COBL     | -1.904650487 | 7.431206279 | -7.628912631 | 2.07E-10 |
| RUUBL1   | 1.204052331  | 7.281508069 | 7.627856891  | 2.08E-10 |
| APMAP    | 1.097595361  | 8.640613655 | 7.62434805   | 2.11E-10 |
| CXCR2    | -3.09042382  | 6.16922465  | -7.616676848 | 2.17E-10 |
| CENPM    | 1.085690777  | 7.312341876 | 7.610616212  | 2.23E-10 |
| SMYD3    | 1.394220945  | 7.042328876 | 7.605038938  | 2.28E-10 |
| KNTC1    | 1.203348968  | 6.161969527 | 7.601954206  | 2.30E-10 |
| CDC20    | 1.876099414  | 8.015036826 | 7.60112471   | 2.31E-10 |
| SORBS2   | -1.357544009 | 5.566630148 | -7.588959638 | 2.43E-10 |
| CST1     | 3.040054962  | 5.508914244 | 7.588885464  | 2.43E-10 |
| RAD54B   | 1.430818171  | 5.953347518 | 7.588726114  | 2.43E-10 |
| SH3GLB2  | -1.306472547 | 6.346542623 | -7.586619829 | 2.45E-10 |
| SLC39A6  | 1.177040296  | 8.533972168 | 7.566815506  | 2.65E-10 |
| APOBEC3B | 2.796740285  | 6.643095454 | 7.561704599  | 2.70E-10 |
| TK1      | 1.170138712  | 7.416015511 | 7.558432397  | 2.74E-10 |
| OBFC1    | -1.875857349 | 7.715916229 | -7.547602987 | 2.85E-10 |
| DBF4     | 1.450831422  | 7.486114408 | 7.535304196  | 3.00E-10 |
| HPRT1    | 1.011469638  | 9.479687573 | 7.505383249  | 3.37E-10 |
| ENDOU    | -3.381356428 | 6.750113104 | -7.482637148 | 3.69E-10 |
| MPC1     | -1.003908351 | 9.259419593 | -7.46842305  | 3.90E-10 |
| MCM10    | 1.711378114  | 5.441406296 | 7.460008786  | 4.03E-10 |
| EMP1     | -2.379673318 | 9.588476779 | -7.453792898 | 4.13E-10 |
| NUSAP1   | 1.504194928  | 7.460764617 | 7.421164658  | 4.70E-10 |
| TLR3     | -1.48412877  | 5.865038882 | -7.417190937 | 4.77E-10 |
| LPIN1    | -1.205458214 | 6.667337161 | -7.415784626 | 4.80E-10 |
| CDT1     | 1.00795409   | 5.241439001 | 7.415252182  | 4.81E-10 |
| GMNN     | 1.331875921  | 8.706101503 | 7.399911805  | 5.11E-10 |
| GYS2     | -2.490185917 | 4.541361728 | -7.394771407 | 5.21E-10 |
| GDPD3    | -2.125454656 | 7.410502877 | -7.378878523 | 5.55E-10 |
| BUB1B    | 1.740660406  | 7.717363448 | 7.363072289  | 5.91E-10 |
| NPEPPS   | -1.007798331 | 8.019316663 | -7.349385227 | 6.23E-10 |
| TAF1A    | 1.149589892  | 4.736728702 | 7.349320173  | 6.24E-10 |
| CRISP3   | -5.319100155 | 6.697858243 | -7.337302013 | 6.54E-10 |
| SLC24A3  | -1.766107749 | 7.520755958 | -7.334914217 | 6.60E-10 |
| ALDH9A1  | -1.198393957 | 10.59445889 | -7.333403624 | 6.64E-10 |
| MRGBP    | 1.137936334  | 6.202927351 | 7.324408753  | 6.88E-10 |
| TRIP10   | -1.583112323 | 8.316229437 | -7.322322082 | 6.94E-10 |
| APOC1    | 1.426431533  | 7.459102431 | 7.312569475  | 7.21E-10 |
| SNAPC1   | 1.233592803  | 7.194009223 | 7.28249906   | 8.11E-10 |
| SLC16A7  | -1.907793926 | 6.862127274 | -7.282381308 | 8.12E-10 |
| BIRC5    | 1.295819802  | 6.370527598 | 7.271314277  | 8.48E-10 |
| ABHD5    | -1.15921791  | 6.374223499 | -7.258711995 | 8.91E-10 |
| PLA2G7   | 1.466316331  | 4.838821486 | 7.256548842  | 8.99E-10 |

|          |              |             |              |          |
|----------|--------------|-------------|--------------|----------|
| SERPINB6 | -1.30324668  | 8.98389721  | -7.255635942 | 9.02E-10 |
| HLTF     | 1.243640295  | 7.832369755 | 7.24787974   | 9.30E-10 |
| RPA3     | 1.003534379  | 8.871835563 | 7.24639424   | 9.35E-10 |
| DUSP5    | -2.117306569 | 8.089179639 | -7.238107057 | 9.67E-10 |
| ITPR2    | -1.113966302 | 5.89049699  | -7.22517256  | 1.02E-09 |
| FAM64A   | 1.032285619  | 5.964362461 | 7.202492358  | 1.11E-09 |
| NCAPH    | 1.177006714  | 6.202251938 | 7.184185214  | 1.20E-09 |
| EREG     | -2.950221963 | 6.239615011 | -7.177841862 | 1.23E-09 |
| DTL      | 1.866176128  | 7.358776068 | 7.176932231  | 1.23E-09 |
| SNX10    | 2.026359822  | 6.432124094 | 7.17275794   | 1.25E-09 |
| NCAPG    | 1.451593059  | 6.567655521 | 7.143258376  | 1.40E-09 |
| TMEM246  | -1.228897866 | 6.368872968 | -7.133530511 | 1.46E-09 |
| PDCD6IP  | -1.011804759 | 9.453357312 | -7.119943121 | 1.54E-09 |
| KLF4     | -1.729261583 | 8.862500156 | -7.108205179 | 1.61E-09 |
| FAM189A2 | -1.431934368 | 5.855790503 | -7.083010817 | 1.78E-09 |
| RRAD     | -1.747542577 | 7.032503203 | -7.082106204 | 1.79E-09 |
| DENND4C  | -1.067246291 | 6.876726358 | -7.077439434 | 1.82E-09 |
| VOPP1    | 1.436502262  | 9.004261699 | 7.069354264  | 1.88E-09 |
| HJURP    | 1.406186561  | 6.584383817 | 7.046279086  | 2.06E-09 |
| ORC6     | 1.497752366  | 8.075470368 | 7.041944368  | 2.09E-09 |
| TIPIN    | 1.189270466  | 6.124127669 | 7.022197614  | 2.26E-09 |
| ARL6IP5  | -1.093688794 | 9.791216014 | -7.019445627 | 2.29E-09 |
| HMMR     | 1.512215269  | 6.820746097 | 7.018514717  | 2.29E-09 |
| STK39    | -1.345899383 | 8.6631767   | -7.014854705 | 2.33E-09 |
| ECHDC2   | -1.426116252 | 8.851115021 | -7.01434054  | 2.33E-09 |
| HOXD11   | 1.467349296  | 5.270022905 | 7.011740811  | 2.36E-09 |
| NETO2    | 1.615062528  | 7.512736969 | 7.006801955  | 2.40E-09 |
| GIPC2    | -1.223515504 | 4.632984047 | -7.004178986 | 2.43E-09 |
| FYCO1    | -1.427637734 | 7.399086349 | -6.990668148 | 2.56E-09 |
| MARCKSL1 | 1.983540817  | 8.428222852 | 6.984037359  | 2.63E-09 |
| VCAN     | 2.313177903  | 7.014512087 | 6.957429356  | 2.92E-09 |
| TMEM132A | 1.087859682  | 7.425798287 | 6.950024839  | 3.00E-09 |
| TMEM57   | -1.034196036 | 7.1958499   | -6.937349187 | 3.16E-09 |
| CAMK2N1  | -1.831368861 | 8.123066248 | -6.937043956 | 3.16E-09 |
| CYP4B1   | -3.108761642 | 6.632522447 | -6.925023008 | 3.31E-09 |
| GGH      | 1.535944987  | 8.521015673 | 6.91930052   | 3.39E-09 |
| RAP1A    | -1.063053831 | 10.13572404 | -6.88482719  | 3.88E-09 |
| DDX39A   | 1.051066014  | 8.797001855 | 6.8757744    | 4.02E-09 |
| SERPINH1 | 1.643999339  | 8.164218186 | 6.866057209  | 4.18E-09 |
| MAL      | -4.259272524 | 10.0601721  | -6.848783831 | 4.47E-09 |
| EPHX2    | -1.432581847 | 6.489365966 | -6.846712307 | 4.51E-09 |
| CCNG2    | -1.796554267 | 7.946129799 | -6.841618485 | 4.60E-09 |
| SLC25A32 | 1.086680073  | 8.284025877 | 6.826285512  | 4.88E-09 |
| FNDC4    | -1.071432533 | 7.249163406 | -6.818075015 | 5.04E-09 |
| DHRS1    | -1.690165088 | 8.876733938 | -6.811769716 | 5.17E-09 |
| DUSP1    | -1.244223259 | 8.646419455 | -6.808156231 | 5.24E-09 |
| MELK     | 1.560613041  | 8.008960678 | 6.804580395  | 5.32E-09 |
| DYNLT3   | -1.326776907 | 10.45175431 | -6.789551414 | 5.64E-09 |
| RPP25    | 1.118106441  | 7.054209895 | 6.787752858  | 5.68E-09 |
| SHCBP1   | 1.477515839  | 6.219281478 | 6.785468349  | 5.73E-09 |
| NUP62CL  | 1.051654111  | 4.493696915 | 6.769339375  | 6.10E-09 |
| SIX1     | 1.116091996  | 5.156419974 | 6.76882066   | 6.12E-09 |
| HOMER3   | 1.061629136  | 6.041256814 | 6.759971844  | 6.33E-09 |

|            |              |             |              |          |
|------------|--------------|-------------|--------------|----------|
| PUS7       | 1.188553698  | 8.375475152 | 6.753520801  | 6.49E-09 |
| MAFF       | -1.135769848 | 8.708322579 | -6.739915325 | 6.85E-09 |
| ALDH2      | -1.00610881  | 9.62760264  | -6.734157568 | 7.01E-09 |
| SLC16A1    | 1.201503042  | 6.474564896 | 6.726514224  | 7.22E-09 |
| HLF        | -1.914607956 | 6.619852905 | -6.722407713 | 7.34E-09 |
| LRP12      | 1.295719177  | 4.696020895 | 6.715787136  | 7.53E-09 |
| GMDS       | -1.442927956 | 7.033975951 | -6.715156253 | 7.55E-09 |
| DDAH1      | -1.549108799 | 8.84264133  | -6.711419503 | 7.66E-09 |
| BORA       | 1.208892762  | 6.589906826 | 6.682890102  | 8.56E-09 |
| EPS8L1     | -1.708197823 | 7.442757012 | -6.67442779  | 8.85E-09 |
| ACADM      | -1.096311212 | 8.829513286 | -6.668315156 | 9.07E-09 |
| LRRC8D     | 1.016742884  | 8.303565495 | 6.659153532  | 9.40E-09 |
| NELL2      | 1.936810082  | 7.127199406 | 6.641776907  | 1.01E-08 |
| POSTN      | 2.121777643  | 6.795588431 | 6.639625934  | 1.01E-08 |
| EPCAM      | 2.35762699   | 9.427710184 | 6.597588973  | 1.20E-08 |
| MRPS17     | 1.083487331  | 8.286632128 | 6.579712666  | 1.28E-08 |
| LMNB2      | 1.099589133  | 7.580063889 | 6.577585252  | 1.29E-08 |
| AKR1B1     | 1.265144091  | 8.819990816 | 6.573892648  | 1.31E-08 |
| MMP13      | 2.369110229  | 4.983430045 | 6.567058506  | 1.35E-08 |
| LPCAT1     | 1.490876217  | 7.19315445  | 6.565106281  | 1.36E-08 |
| ASPM       | 1.858555815  | 7.447521753 | 6.557332115  | 1.40E-08 |
| PFN2       | 1.716179483  | 9.863243473 | 6.519976297  | 1.62E-08 |
| SOX12      | 1.005844496  | 5.321969952 | 6.515688318  | 1.65E-08 |
| ECM1       | -2.678704773 | 10.05000491 | -6.500794023 | 1.75E-08 |
| UBE2S      | 1.312039953  | 8.76249792  | 6.48974512   | 1.82E-08 |
| CH25H      | -2.141814108 | 7.076605352 | -6.488497323 | 1.83E-08 |
| SLC39A4    | 1.014237371  | 8.054813603 | 6.483742083  | 1.87E-08 |
| POLE2      | 1.34502784   | 6.603874342 | 6.475964493  | 1.92E-08 |
| RFC3       | 1.035954759  | 5.763774358 | 6.475919714  | 1.92E-08 |
| ADH1B      | -2.453041127 | 5.68279517  | -6.469017087 | 1.98E-08 |
| OIP5       | 1.497812871  | 5.899690887 | 6.455633931  | 2.08E-08 |
| ASCC2      | -1.055701067 | 7.732088857 | -6.427350758 | 2.32E-08 |
| GULP1      | -1.017379726 | 6.565007124 | -6.425325007 | 2.34E-08 |
| CWH43      | -2.482389049 | 6.027968431 | -6.423266692 | 2.36E-08 |
| RANBP9     | -1.457872302 | 7.948557272 | -6.419594458 | 2.40E-08 |
| MINPP1     | 1.119203576  | 6.090160258 | 6.419038304  | 2.40E-08 |
| NAGK       | -1.065509547 | 9.540799258 | -6.418504353 | 2.41E-08 |
| SCNN1B     | -2.109076334 | 6.815070242 | -6.401219874 | 2.57E-08 |
| ERVMER34-1 | 1.244827375  | 5.013328211 | 6.394842364  | 2.64E-08 |
| PLAGL1     | -1.200458531 | 8.043449973 | -6.389577085 | 2.69E-08 |
| KCNS3      | 1.522618384  | 7.318350448 | 6.387978319  | 2.71E-08 |
| RRAGD      | -1.569773246 | 7.71801777  | -6.376957011 | 2.83E-08 |
| CDH11      | 1.746343873  | 6.524205167 | 6.363448643  | 2.98E-08 |
| EHD3       | -1.68631343  | 7.595078768 | -6.355268791 | 3.08E-08 |
| CCNA2      | 1.255447484  | 6.102411716 | 6.354421594  | 3.09E-08 |
| ITGA6      | 1.461204957  | 8.055560473 | 6.342889133  | 3.23E-08 |
| CPPED1     | -1.128305097 | 5.342588077 | -6.339104103 | 3.28E-08 |
| CHST1      | 1.273792191  | 6.092348363 | 6.332424293  | 3.36E-08 |
| PIM1       | -1.029482137 | 8.30190973  | -6.327732579 | 3.43E-08 |
| CCNB1      | 1.606319688  | 8.085052349 | 6.325302675  | 3.46E-08 |
| CRYAB      | -1.802493396 | 9.558887745 | -6.310812537 | 3.66E-08 |
| RORA       | -1.718678586 | 6.772067576 | -6.306063983 | 3.73E-08 |
| SULF1      | 1.85623994   | 7.313133721 | 6.303337457  | 3.77E-08 |

|          |              |             |              |          |
|----------|--------------|-------------|--------------|----------|
| TP53I3   | -1.689527898 | 8.332435219 | -6.300446768 | 3.81E-08 |
| FST      | 1.656128456  | 6.850757783 | 6.284770081  | 4.05E-08 |
| BLVRB    | -1.066920718 | 9.615295128 | -6.277938709 | 4.16E-08 |
| FLG      | -3.318918192 | 6.201555285 | -6.265032692 | 4.37E-08 |
| VPS37B   | -1.113807614 | 7.897460047 | -6.262963909 | 4.41E-08 |
| BEX4     | -2.182850805 | 7.844355017 | -6.257344437 | 4.50E-08 |
| MXD1     | -1.919636498 | 6.045719668 | -6.257057844 | 4.51E-08 |
| PTN      | -1.518334494 | 7.49804352  | -6.254678484 | 4.55E-08 |
| NFE2L3   | 1.492209556  | 5.599692297 | 6.254487339  | 4.55E-08 |
| P2RY14   | -1.730048355 | 5.845486517 | -6.242643608 | 4.77E-08 |
| XK       | -1.572154353 | 5.762016124 | -6.239548936 | 4.82E-08 |
| C2orf54  | -2.033350697 | 6.332541111 | -6.220919557 | 5.19E-08 |
| RAI14    | 1.465023743  | 7.923295964 | 6.220467218  | 5.19E-08 |
| LEPREL4  | 1.242356657  | 6.424179523 | 6.216267481  | 5.28E-08 |
| DPYD     | -1.598841907 | 7.817300923 | -6.212906467 | 5.35E-08 |
| COL3A1   | 2.109960189  | 10.76570006 | 6.200879548  | 5.60E-08 |
| DFNA5    | 1.388185796  | 7.731729665 | 6.199359835  | 5.64E-08 |
| CBS      | 1.250652618  | 5.098307541 | 6.196385549  | 5.70E-08 |
| LAMC2    | 1.826649074  | 5.882673053 | 6.189772034  | 5.85E-08 |
| FAP      | 1.61721806   | 6.067835605 | 6.187209477  | 5.91E-08 |
| TFAP2B   | -1.36705308  | 4.761040291 | -6.183696923 | 5.99E-08 |
| GEMIN2   | 1.049983711  | 6.145446527 | 6.180180651  | 6.07E-08 |
| MEIS1    | -1.255261868 | 8.335748559 | -6.17110004  | 6.29E-08 |
| MKI67    | 1.078856342  | 6.230212788 | 6.169540677  | 6.33E-08 |
| COL5A2   | 2.118963542  | 8.186121645 | 6.158735177  | 6.60E-08 |
| COL1A2   | 2.396906845  | 10.95578733 | 6.156206196  | 6.66E-08 |
| SLURP1   | -3.476268348 | 8.718251885 | -6.152015615 | 6.77E-08 |
| ZNF365   | -1.701405295 | 6.935039626 | -6.143229809 | 7.01E-08 |
| PSCA     | -2.639879247 | 7.286379123 | -6.142877074 | 7.02E-08 |
| ZFP36    | -1.368728156 | 10.61102456 | -6.142768642 | 7.02E-08 |
| PARP12   | 1.003000453  | 8.165330419 | 6.140650482  | 7.08E-08 |
| ZIC1     | 2.410119215  | 5.308149781 | 6.135981989  | 7.20E-08 |
| ATP1B3   | 1.229453291  | 11.43702103 | 6.131510928  | 7.33E-08 |
| TTC9     | -2.013763409 | 6.661084779 | -6.122468502 | 7.59E-08 |
| GPR126   | -1.515289802 | 6.195566199 | -6.117508199 | 7.74E-08 |
| TGFBI    | 2.029998762  | 9.167479728 | 6.103363778  | 8.17E-08 |
| JAG2     | 1.004834757  | 7.563630335 | 6.100620658  | 8.26E-08 |
| TJP1     | -1.234707819 | 8.354581708 | -6.098555212 | 8.33E-08 |
| IGF2BP2  | 1.703120091  | 8.781146943 | 6.082673154  | 8.85E-08 |
| SERPINE1 | 1.755316754  | 6.934077303 | 6.0816666    | 8.89E-08 |
| FAT1     | 1.104537253  | 9.16839448  | 6.058411383  | 9.72E-08 |
| ANXA9    | -1.842897061 | 5.609394792 | -6.052845091 | 9.93E-08 |
| COL7A1   | 1.287634421  | 7.436208351 | 6.051916735  | 9.97E-08 |
| TMEM97   | 1.090697511  | 7.634116831 | 6.040038488  | 1.04E-07 |
| ITM2A    | -1.760589248 | 7.551787553 | -6.034391479 | 1.07E-07 |
| CDC7     | 1.131160729  | 6.827712706 | 6.033364509  | 1.07E-07 |
| PRSS3    | -2.109720559 | 7.440895375 | -6.007025735 | 1.19E-07 |
| GNE      | -1.111201836 | 6.932360551 | -6.000247222 | 1.22E-07 |
| LAMB3    | 1.937185205  | 8.571078608 | 5.985954167  | 1.29E-07 |
| ACOX2    | -1.080173104 | 5.686766134 | -5.962709468 | 1.41E-07 |
| PPAP2C   | 1.13307142   | 7.115812833 | 5.956357165  | 1.44E-07 |
| BBOX1    | -2.436650973 | 5.585401853 | -5.948272099 | 1.49E-07 |
| ALS2CL   | -1.184881257 | 7.307334495 | -5.942168954 | 1.52E-07 |

|          |              |             |              |          |
|----------|--------------|-------------|--------------|----------|
| MANSC1   | -1.301252713 | 9.006095897 | -5.929406175 | 1.60E-07 |
| EFNA1    | 1.028794205  | 8.518005054 | 5.924429417  | 1.63E-07 |
| ABCC5    | 1.18346226   | 8.764831281 | 5.917913457  | 1.67E-07 |
| PPFIBP2  | -1.180663268 | 7.408984018 | -5.912882707 | 1.70E-07 |
| TMPRSS2  | -1.284629527 | 5.902724929 | -5.905517967 | 1.75E-07 |
| MMP10    | 2.723596663  | 5.415518496 | 5.903320355  | 1.77E-07 |
| NUDT11   | 1.165080211  | 6.575003462 | 5.901201439  | 1.78E-07 |
| MFHAS1   | 1.331933451  | 7.498537919 | 5.886656794  | 1.88E-07 |
| RRM2     | 1.738216808  | 9.161244783 | 5.865355463  | 2.04E-07 |
| P4HA1    | 1.122530667  | 7.686551349 | 5.85170781   | 2.15E-07 |
| LRP8     | 1.242336114  | 6.452753383 | 5.842388171  | 2.23E-07 |
| PRSS2    | -1.325682804 | 6.093087979 | -5.841108594 | 2.24E-07 |
| CLIC3    | -3.425161933 | 8.30032242  | -5.841060373 | 2.24E-07 |
| BLNK     | -2.234559671 | 8.097304262 | -5.827986426 | 2.36E-07 |
| MMP3     | 2.329265139  | 5.239332391 | 5.808757536  | 2.54E-07 |
| PPFIA1   | 1.732272635  | 7.243551699 | 5.804991886  | 2.57E-07 |
| FAM107A  | -1.243736323 | 6.266950286 | -5.781922374 | 2.81E-07 |
| CYP2E1   | -1.397127985 | 5.491956848 | -5.759383099 | 3.06E-07 |
| RNF141   | -1.260816953 | 7.559295993 | -5.750446645 | 3.17E-07 |
| DSG2     | 1.548878677  | 9.268707661 | 5.747603479  | 3.20E-07 |
| CST4     | 1.118695867  | 7.069119226 | 5.732996234  | 3.39E-07 |
| ARPC1B   | 1.267598276  | 9.399256235 | 5.732445205  | 3.39E-07 |
| ARTN     | 1.026512199  | 5.817541471 | 5.725494709  | 3.49E-07 |
| PDZD2    | -1.696401097 | 7.359817568 | -5.718121247 | 3.58E-07 |
| EPS8L2   | -1.517222819 | 8.504431466 | -5.717573137 | 3.59E-07 |
| DEPDC1   | 1.03470924   | 5.199286921 | 5.706588065  | 3.75E-07 |
| OR7E14P  | -1.594578797 | 5.408648261 | -5.704881808 | 3.77E-07 |
| UPK1A    | -2.210858786 | 5.892515127 | -5.691353634 | 3.97E-07 |
| SLC16A6  | -1.698422759 | 6.343197948 | -5.684235306 | 4.08E-07 |
| CEACAM1  | -1.577385166 | 6.543698163 | -5.682047133 | 4.11E-07 |
| TXNRD1   | 1.471616101  | 8.929886818 | 5.673737047  | 4.24E-07 |
| SNX24    | -1.1170652   | 6.849058399 | -5.665630697 | 4.38E-07 |
| INHBA    | 1.297396814  | 5.312730603 | 5.658588205  | 4.50E-07 |
| TGM3     | -3.832234314 | 9.340107805 | -5.658506216 | 4.50E-07 |
| GCLM     | 1.640238425  | 7.663520133 | 5.648142492  | 4.68E-07 |
| ZWINT    | 1.368481313  | 8.490245379 | 5.643191642  | 4.77E-07 |
| CXCL1    | 1.85328565   | 6.765082255 | 5.626089986  | 5.09E-07 |
| ISG15    | 1.971363282  | 8.788131488 | 5.625228253  | 5.10E-07 |
| LAMP3    | 1.822988556  | 7.757428913 | 5.621496995  | 5.18E-07 |
| MOXD1    | -1.103614824 | 7.040060317 | -5.599773187 | 5.62E-07 |
| KLHL7    | 1.183895939  | 5.247254783 | 5.592821625  | 5.77E-07 |
| TM7SF2   | -1.165973915 | 7.007316616 | -5.579272725 | 6.07E-07 |
| GOLM1    | 1.408377586  | 6.63321357  | 5.565273642  | 6.40E-07 |
| HMGA2    | 1.887224938  | 5.460375055 | 5.564908024  | 6.41E-07 |
| FUT6     | -1.511777963 | 6.171366984 | -5.55907773  | 6.56E-07 |
| CFD      | -2.118084767 | 8.608763664 | -5.557420931 | 6.60E-07 |
| CRNN     | -4.334729425 | 9.506117304 | -5.555102613 | 6.66E-07 |
| SLC6A1   | -1.018700361 | 4.416132707 | -5.535292925 | 7.17E-07 |
| SERPINB1 | -2.160123499 | 10.11823751 | -5.535162278 | 7.18E-07 |
| CEACAM7  | -1.598312389 | 5.236806093 | -5.51934539  | 7.62E-07 |
| CRCT1    | -3.857159234 | 8.206883515 | -5.515098212 | 7.74E-07 |
| FMO2     | -2.674284873 | 7.637144964 | -5.514159006 | 7.77E-07 |
| NBEAL2   | -1.014894877 | 7.391033632 | -5.49696666  | 8.29E-07 |



|          |              |             |              |          |
|----------|--------------|-------------|--------------|----------|
| FAM60A   | 1.178714946  | 9.149403267 | 5.48448663   | 8.69E-07 |
| RBPMS    | -1.247614691 | 6.789221182 | -5.484433602 | 8.69E-07 |
| ETHE1    | -1.043853471 | 8.722818257 | -5.476008037 | 8.97E-07 |
| IL36A    | -1.396288164 | 5.834141738 | -5.46918669  | 9.20E-07 |
| PTPLAD1  | 1.126313873  | 6.658483648 | 5.463357944  | 9.41E-07 |
| ADRB2    | -1.117164135 | 6.197870456 | -5.461474519 | 9.47E-07 |
| CNN3     | -1.514995125 | 8.398464822 | -5.459272875 | 9.55E-07 |
| MYO1B    | 1.022382564  | 6.850420017 | 5.444660754  | 1.01E-06 |
| IL13RA1  | -1.164694612 | 7.223973604 | -5.434262628 | 1.05E-06 |
| LMNB1    | 1.211875436  | 7.460129313 | 5.433029895  | 1.05E-06 |
| SLC12A8  | 1.232441587  | 6.189041274 | 5.426414483  | 1.08E-06 |
| NDC1     | 1.007525093  | 5.432608475 | 5.416551967  | 1.12E-06 |
| MAOA     | -1.157324028 | 7.887765553 | -5.407538685 | 1.16E-06 |
| ABAT     | -1.117779677 | 6.140904902 | -5.403788598 | 1.18E-06 |
| GCHFR    | -1.285055738 | 6.940895182 | -5.393832273 | 1.22E-06 |
| CDH3     | 1.953060531  | 8.460940503 | 5.385459614  | 1.26E-06 |
| ABCA8    | -2.471966414 | 6.048605663 | -5.37898847  | 1.29E-06 |
| NUAK1    | 1.347938099  | 7.485184177 | 5.375120512  | 1.31E-06 |
| FUT3     | -1.58540827  | 6.424774916 | -5.368951241 | 1.34E-06 |
| KLK13    | -1.861037569 | 6.720663989 | -5.362345784 | 1.37E-06 |
| SLC6A8   | 1.164911893  | 8.661959638 | 5.344858324  | 1.47E-06 |
| KIAA0101 | 1.198433089  | 8.328489219 | 5.343976221  | 1.47E-06 |
| TIPARP   | -1.021900102 | 9.420060621 | -5.335433541 | 1.52E-06 |
| NMRK1    | -1.115994131 | 8.746779781 | -5.332563599 | 1.54E-06 |
| FJX1     | 1.06369423   | 6.843562701 | 5.327728957  | 1.56E-06 |
| TGFBR3   | -1.65987085  | 7.524036117 | -5.324844947 | 1.58E-06 |
| PRAME    | 1.318076634  | 5.286174496 | 5.321606449  | 1.60E-06 |
| KDELC1   | 1.020068827  | 5.387228711 | 5.309274301  | 1.68E-06 |
| FOS      | -1.916547259 | 9.120589671 | -5.301201915 | 1.73E-06 |
| PPAT     | 1.058892091  | 6.500764304 | 5.29857556   | 1.74E-06 |
| YOD1     | -1.377260056 | 4.41416746  | -5.295793335 | 1.76E-06 |
| CYP2J2   | -1.466179453 | 6.604443669 | -5.293628267 | 1.78E-06 |
| LIMCH1   | -1.399585431 | 6.607329676 | -5.276585577 | 1.89E-06 |
| CXCL8    | 1.868328377  | 6.255563707 | 5.273494921  | 1.92E-06 |
| ANXA3    | -1.696220792 | 8.217049887 | -5.268632589 | 1.95E-06 |
| HOXD10   | 1.144169477  | 4.618552555 | 5.260094029  | 2.01E-06 |
| KIF11    | 1.328604789  | 6.992155241 | 5.238787712  | 2.18E-06 |
| TBL1XR1  | 1.194352507  | 6.542072609 | 5.234393976  | 2.22E-06 |
| TDO2     | 1.373238098  | 5.076280729 | 5.217694346  | 2.36E-06 |
| GALNT6   | 1.298541305  | 6.062377405 | 5.216697531  | 2.37E-06 |
| CYP2C18  | -2.014419843 | 6.785492332 | -5.208836201 | 2.44E-06 |
| SEL1L3   | 1.213377931  | 6.773729926 | 5.202330114  | 2.50E-06 |
| COL6A3   | 1.658104602  | 10.33562993 | 5.168673667  | 2.83E-06 |
| RUNX3    | 1.045712717  | 6.296075947 | 5.164019934  | 2.88E-06 |
| ELOVL4   | -1.455415084 | 6.199222953 | -5.160805092 | 2.91E-06 |
| CES2     | -1.425237003 | 9.169676894 | -5.159760648 | 2.92E-06 |
| IGF2BP3  | 1.584708123  | 6.005815803 | 5.152568193  | 3.00E-06 |
| ALCAM    | 1.337210276  | 8.491170918 | 5.150128881  | 3.03E-06 |
| ANO1     | 2.546960241  | 7.302857586 | 5.147644321  | 3.06E-06 |
| GPNMB    | 1.459214307  | 10.81117457 | 5.146057188  | 3.07E-06 |
| SYNPO2L  | -1.792635933 | 4.321039847 | -5.130408591 | 3.26E-06 |
| MAOB     | -1.679314149 | 7.404996853 | -5.123313175 | 3.34E-06 |
| TNFAIP6  | 1.607139287  | 6.600896179 | 5.119472432  | 3.39E-06 |

|           |              |             |              |          |
|-----------|--------------|-------------|--------------|----------|
| CXCL10    | 1.727803909  | 6.723350043 | 5.105465878  | 3.57E-06 |
| BGN       | 1.194044927  | 6.694907346 | 5.0963648    | 3.69E-06 |
| SULT2B1   | -1.915321133 | 7.657483317 | -5.095091377 | 3.71E-06 |
| SOAT1     | 1.245602294  | 5.238108742 | 5.093070296  | 3.74E-06 |
| C1orf116  | -1.938749938 | 7.716777713 | -5.079264022 | 3.93E-06 |
| TMOD3     | -1.670564255 | 5.961169013 | -5.07479726  | 4.00E-06 |
| PPL       | -2.148804819 | 10.22861441 | -5.065416151 | 4.14E-06 |
| DNASE1L3  | -1.670324393 | 6.627677734 | -5.064436404 | 4.15E-06 |
| ZDHHC13   | -1.268483181 | 8.003373285 | -5.044481724 | 4.47E-06 |
| CD207     | -1.225759129 | 5.519236176 | -5.038805374 | 4.56E-06 |
| PLOD3     | 1.036387741  | 7.732173915 | 5.038506361  | 4.57E-06 |
| SPRY1     | -1.102631704 | 7.612014145 | -5.023507676 | 4.83E-06 |
| MMP9      | 1.623301988  | 6.626378221 | 5.018990677  | 4.91E-06 |
| NCF2      | 1.185743372  | 5.91655356  | 5.00613468   | 5.14E-06 |
| PAK1      | 1.059063584  | 4.90710763  | 5.004948498  | 5.17E-06 |
| EN1       | 1.30149296   | 4.063533105 | 5.003830517  | 5.19E-06 |
| HERC5     | 1.219026974  | 6.374257807 | 4.991316044  | 5.43E-06 |
| TTK       | 1.714306174  | 7.338147103 | 4.991013689  | 5.44E-06 |
| ZNF426    | -1.533013605 | 7.225288079 | -4.985968859 | 5.54E-06 |
| ITGA8     | -1.701576673 | 6.152023576 | -4.980712738 | 5.64E-06 |
| SNX16     | -1.237622152 | 5.920913779 | -4.976251185 | 5.74E-06 |
| EZH2      | 1.370283374  | 7.092897075 | 4.934403898  | 6.68E-06 |
| TGM1      | -2.358576178 | 9.354419241 | -4.932502508 | 6.73E-06 |
| DEPTOR    | -1.426645753 | 6.991021627 | -4.930802501 | 6.77E-06 |
| COL5A1    | 1.51428014   | 7.325007022 | 4.918822117  | 7.07E-06 |
| UCHL1     | 2.239654431  | 7.207359543 | 4.913829698  | 7.20E-06 |
| UPK3B     | -1.466888857 | 6.198876945 | -4.909211961 | 7.33E-06 |
| CYP3A5    | -1.842872939 | 6.577555779 | -4.908372376 | 7.35E-06 |
| FADD      | 1.465426344  | 8.28094624  | 4.90733583   | 7.38E-06 |
| PDE2A     | -1.159050917 | 6.480085149 | -4.898731278 | 7.61E-06 |
| TJP3      | -1.042643275 | 6.219556705 | -4.894826314 | 7.72E-06 |
| SLC39A14  | 1.507533481  | 7.949138939 | 4.892120704  | 7.80E-06 |
| SCEL      | -3.441435803 | 8.377481511 | -4.880478901 | 8.13E-06 |
| MALL      | -2.057866286 | 9.708695437 | -4.86349407  | 8.65E-06 |
| PANX1     | 1.077699406  | 6.284656107 | 4.860673624  | 8.74E-06 |
| IL1RN     | -1.752643921 | 7.348822315 | -4.847721517 | 9.16E-06 |
| KLF2      | -1.20075278  | 8.204251986 | -4.842651221 | 9.33E-06 |
| ODC1      | 1.694190395  | 10.07041865 | 4.821406279  | 1.01E-05 |
| LUM       | 1.566447661  | 10.41513257 | 4.818558651  | 1.02E-05 |
| MUC1      | -1.235041827 | 7.822875526 | -4.792318416 | 1.12E-05 |
| SLC2A1    | 1.294749113  | 7.116169587 | 4.792023556  | 1.12E-05 |
| TCN1      | -1.928930252 | 6.525837239 | -4.784414459 | 1.15E-05 |
| POPDC3    | 1.508764966  | 4.98036158  | 4.781265714  | 1.16E-05 |
| PTTG1     | 1.053131126  | 9.566834063 | 4.777842735  | 1.18E-05 |
| GPR110    | -1.007796278 | 4.946679277 | -4.772796244 | 1.20E-05 |
| VLDLR     | -1.098283826 | 7.476813152 | -4.769651266 | 1.21E-05 |
| ACPP      | -2.232300059 | 7.467262307 | -4.764436113 | 1.24E-05 |
| PTHLH     | 2.194587759  | 6.060038088 | 4.758995052  | 1.26E-05 |
| KLK12     | -2.087031521 | 7.697869423 | -4.743827111 | 1.33E-05 |
| S100P     | -2.371874235 | 8.912175664 | -4.731973904 | 1.39E-05 |
| OLFML2B   | 1.145851381  | 6.619270828 | 4.726360619  | 1.42E-05 |
| TMPRSS11E | -3.069847619 | 8.260938279 | -4.720224071 | 1.45E-05 |
| NOX4      | 1.073240987  | 4.441355684 | 4.717231998  | 1.47E-05 |

|         |              |             |              |          |
|---------|--------------|-------------|--------------|----------|
| CCDC6   | -1.052514445 | 7.623753199 | -4.716134022 | 1.47E-05 |
| PLAUR   | 1.065452618  | 6.815236903 | 4.712947433  | 1.49E-05 |
| EVPL    | -1.678811028 | 8.135978907 | -4.708100136 | 1.51E-05 |
| LAMA3   | 1.283018942  | 7.87119489  | 4.70566131   | 1.53E-05 |
| TMEM100 | -1.609331594 | 4.886646867 | -4.699229311 | 1.56E-05 |
| MLF1    | 1.250998788  | 6.764065113 | 4.699076382  | 1.56E-05 |
| PLAC8   | -2.284478753 | 8.158658739 | -4.631561916 | 1.99E-05 |
| CTSC    | 1.066204713  | 9.198402916 | 4.629279537  | 2.01E-05 |
| NR3C2   | -1.179332823 | 5.114380832 | -4.625546693 | 2.03E-05 |
| SPINK5  | -3.107861524 | 10.17397517 | -4.608242297 | 2.16E-05 |
| LY96    | 1.460771206  | 6.881264798 | 4.604167515  | 2.19E-05 |
| EPHX3   | -2.098806767 | 6.923962458 | -4.60004669  | 2.23E-05 |
| PITX2   | 1.298294823  | 5.265168048 | 4.581780726  | 2.37E-05 |
| MAGEA11 | 1.954496103  | 4.266704956 | 4.574156002  | 2.44E-05 |
| IL18    | -2.229643293 | 7.517104643 | -4.573897343 | 2.44E-05 |
| CRIP1   | -1.223935978 | 9.14996372  | -4.573729959 | 2.44E-05 |
| TPPP3   | -1.375184309 | 7.587609519 | -4.561135068 | 2.55E-05 |
| IGFBP3  | 1.652140773  | 8.320339605 | 4.560675431  | 2.56E-05 |
| ALOX15B | -1.174733536 | 6.56296768  | -4.550068965 | 2.66E-05 |
| FABP6   | 1.131413706  | 6.022196208 | 4.546873969  | 2.69E-05 |
| ELOVL6  | -1.275449586 | 7.010586021 | -4.544752724 | 2.71E-05 |
| TMEM158 | 1.330817635  | 7.233378752 | 4.541791286  | 2.73E-05 |
| CLCA4   | -3.535008301 | 8.785177769 | -4.539629835 | 2.76E-05 |
| BAMBI   | 1.465336694  | 5.968711581 | 4.523815844  | 2.91E-05 |
| THY1    | 1.062841355  | 7.606407826 | 4.506669145  | 3.09E-05 |
| HOPX    | -2.012868073 | 10.68565111 | -4.491387283 | 3.27E-05 |
| PRSS3P2 | -1.093240166 | 7.127472354 | -4.468439027 | 3.54E-05 |
| IFI44   | 1.067782416  | 6.150986151 | 4.462724041  | 3.61E-05 |
| MICB    | 1.031057376  | 5.830488802 | 4.453389738  | 3.73E-05 |
| PER3    | -1.017015217 | 6.74002553  | -4.451710411 | 3.75E-05 |
| CCNA1   | 1.617924536  | 4.950398943 | 4.442557919  | 3.88E-05 |
| RBP1    | 1.414786409  | 8.478814116 | 4.437350217  | 3.95E-05 |
| PTH2R   | 1.462620185  | 4.294608902 | 4.434410424  | 3.99E-05 |
| ACKR1   | -1.669497413 | 6.875837897 | -4.433656922 | 4.00E-05 |
| HSPA2   | -1.075628705 | 9.053855456 | -4.420096583 | 4.19E-05 |
| CDA     | -1.778123465 | 7.056100225 | -4.410575327 | 4.33E-05 |
| ACKR3   | 1.494352652  | 8.715287683 | 4.400931493  | 4.48E-05 |
| GREM2   | -1.066997182 | 4.60321965  | -4.398829586 | 4.51E-05 |
| PTK6    | -1.964197941 | 8.308245601 | -4.389524264 | 4.66E-05 |
| DENND2D | -1.018757312 | 7.747063044 | -4.382217873 | 4.78E-05 |
| SMAGP   | -1.338990876 | 8.363127389 | -4.376763232 | 4.87E-05 |
| SIM2    | -1.119421136 | 6.05297613  | -4.374478837 | 4.91E-05 |
| MMD     | 1.124081745  | 7.592914449 | 4.371038451  | 4.97E-05 |
| BSPRY   | -1.198927357 | 6.95550078  | -4.361578701 | 5.14E-05 |
| POF1B   | -1.198529914 | 6.274042962 | -4.361147059 | 5.15E-05 |
| PLP1    | -1.633243144 | 5.222213787 | -4.357346929 | 5.21E-05 |
| ADORA2B | 1.261490247  | 7.028126159 | 4.353938905  | 5.28E-05 |
| RBM47   | -1.223727957 | 9.112490031 | -4.351526532 | 5.32E-05 |
| KLK11   | -1.815424935 | 9.141318518 | -4.349785449 | 5.35E-05 |
| RERGL   | -1.247813925 | 4.277205566 | -4.348265796 | 5.38E-05 |
| CEMIP   | 1.070225257  | 5.747422496 | 4.343763188  | 5.47E-05 |
| PMEPA1  | 1.420467509  | 6.340868815 | 4.339775376  | 5.54E-05 |
| CXCL12  | -1.454326397 | 6.790920945 | -4.329526269 | 5.74E-05 |

|          |              |             |              |             |
|----------|--------------|-------------|--------------|-------------|
| COL4A1   | 1.424241876  | 8.2136361   | 4.324497828  | 5.84E-05    |
| PAX9     | -1.164496697 | 6.775778196 | -4.312813025 | 6.08E-05    |
| CCDC69   | -1.638500823 | 6.913993764 | -4.298611128 | 6.39E-05    |
| IL33     | -1.607026767 | 5.518700452 | -4.294526139 | 6.48E-05    |
| CEACAM5  | -1.244034813 | 7.51577011  | -4.272889656 | 6.98E-05    |
| GATM     | -1.050126462 | 7.743137696 | -4.27115022  | 7.02E-05    |
| ERO1L    | -1.640739081 | 7.834167407 | -4.267622958 | 7.11E-05    |
| ZBTB16   | -1.418067739 | 4.986703892 | -4.264007772 | 7.20E-05    |
| NTS      | 3.254739389  | 7.046335208 | 4.263235601  | 7.21E-05    |
| ALOX12   | -2.046435989 | 7.380923088 | -4.261893106 | 7.25E-05    |
| SLC27A6  | -1.167438344 | 4.734351607 | -4.259837717 | 7.30E-05    |
| DSG1     | -2.152441404 | 6.429670427 | -4.242382244 | 7.75E-05    |
| GYPC     | -1.030555245 | 7.560338932 | -4.213425214 | 8.56E-05    |
| TWIST1   | 1.047223408  | 6.341716032 | 4.208135957  | 8.71E-05    |
| SELENBP1 | -1.170495429 | 6.606893333 | -4.180554369 | 9.57E-05    |
| GPM6B    | -1.17687746  | 6.737258844 | -4.169208668 | 9.95E-05    |
| C7       | -2.09881265  | 6.210808786 | -4.161210324 | 0.000102225 |
| SLPI     | -1.696687891 | 10.99322861 | -4.156346149 | 0.000103927 |
| PKP3     | -1.151851048 | 7.863028782 | -4.140046372 | 0.000109834 |
| DHCR7    | 1.108555928  | 7.57581754  | 4.136161328  | 0.000111289 |
| PROS1    | -1.107670632 | 7.830761831 | -4.130644862 | 0.000113387 |
| LAMB1    | 1.00699378   | 7.755303381 | 4.127501918  | 0.0001146   |
| MYOC     | -1.423990889 | 6.389274046 | -4.112746522 | 0.000120462 |
| COCH     | 1.127765248  | 5.066429877 | 4.105233154  | 0.000123557 |
| DHRS9    | -1.338831879 | 7.517183991 | -4.102902938 | 0.000124532 |
| SPRR2C   | -2.250084443 | 7.382373771 | -4.097571332 | 0.000126792 |
| ATP1A2   | -1.469343614 | 5.34813372  | -4.096858302 | 0.000127097 |
| PGBD5    | 1.185304932  | 5.887174684 | 4.081205352  | 0.000133979 |
| MAGEA6   | 2.630360521  | 5.927162436 | 4.076401224  | 0.000136163 |
| WFDC1    | -1.231369956 | 7.109572397 | -4.0574372   | 0.000145121 |
| CHST2    | 1.022282729  | 7.010731043 | 4.035850864  | 0.000156012 |
| KRT4     | -2.002507921 | 8.482290658 | -4.025801223 | 0.000161347 |
| PPP1R1A  | -1.092573821 | 4.991570261 | -4.005387127 | 0.000172731 |
| GIMAP6   | -1.062665676 | 6.132670405 | -4.005221342 | 0.000172826 |
| GLTP     | -1.282625129 | 9.239966779 | -3.989851985 | 0.000181909 |
| PRSS23   | 1.155872431  | 7.676964454 | 3.977919017  | 0.000189276 |
| SPARC    | 1.353060847  | 9.779613823 | 3.975014216  | 0.000191112 |
| KRT24    | -2.13365177  | 6.388854638 | -3.967679226 | 0.000195826 |
| FXYD1    | -1.341744912 | 6.144942228 | -3.963521524 | 0.000198547 |
| CTSK     | 1.264417285  | 8.075236641 | 3.963486547  | 0.00019857  |
| SFRP4    | 1.600813313  | 5.907119874 | 3.956752669  | 0.000203056 |
| LY6G6C   | -1.024166039 | 7.773495761 | -3.903718811 | 0.000241955 |
| SPAG1    | -1.030100386 | 6.66535198  | -3.901850184 | 0.000243449 |
| ITIH5    | -1.272457271 | 5.725253764 | -3.882295859 | 0.00025962  |
| SCN9A    | 1.006865162  | 4.180246277 | 3.865623562  | 0.000274219 |
| CLDN1    | 1.206026658  | 6.436575215 | 3.861033982  | 0.000278374 |
| MMP7     | 1.158277657  | 6.699357801 | 3.859828098  | 0.000279476 |
| TMEM45A  | 1.2722226    | 8.383700254 | 3.858753034  | 0.000280462 |
| RSAD2    | 1.086501952  | 5.433447977 | 3.853559015  | 0.000285272 |
| SERPINB2 | -2.483366067 | 8.567758091 | -3.833094824 | 0.000305004 |
| RGS5     | -1.15745082  | 8.469398545 | -3.824116048 | 0.000314069 |
| CYP24A1  | 1.032404957  | 4.799602351 | 3.823705981  | 0.000314489 |
| FHL1     | -1.369191576 | 6.890861684 | -3.822929755 | 0.000315286 |

|           |              |             |              |             |
|-----------|--------------|-------------|--------------|-------------|
| ADAMDEC1  | 1.273484717  | 5.464867993 | 3.814420408  | 0.000324148 |
| PLBD1     | -1.023417681 | 9.234629024 | -3.799472218 | 0.000340298 |
| ZNF185    | -1.84741002  | 9.321269922 | -3.780042169 | 0.000362445 |
| SLC7A11   | 1.447724707  | 5.827471922 | 3.766667687  | 0.000378486 |
| AIM1      | -1.438117831 | 9.558128938 | -3.766355473 | 0.000378868 |
| BASP1     | 1.038963983  | 9.220795458 | 3.755667884  | 0.000392186 |
| IVL       | -1.717791712 | 8.833750121 | -3.750264442 | 0.000399088 |
| MMP2      | 1.420819052  | 8.851450097 | 3.748537667  | 0.000401319 |
| ZWILCH    | 1.132263549  | 6.387325405 | 3.747257632  | 0.00040298  |
| PDZRN3    | -1.242249076 | 7.81046893  | -3.742647249 | 0.000409017 |
| CRABP2    | -1.749481389 | 9.861307453 | -3.7408427   | 0.000411403 |
| ENO2      | 1.145153156  | 6.100812754 | 3.740574666  | 0.000411759 |
| KHDC1L    | 1.153122373  | 4.438997783 | 3.740340346  | 0.00041207  |
| SLCO1B3   | 1.398956422  | 4.768919178 | 3.737614834  | 0.000415705 |
| SEPP1     | -1.098256529 | 10.65157379 | -3.733493814 | 0.00042126  |
| GCNT3     | -1.068704449 | 6.00003579  | -3.729019189 | 0.000427373 |
| EYA2      | -1.163424937 | 6.642810064 | -3.72398165  | 0.000434355 |
| KRT8      | 1.13021151   | 8.762467269 | 3.708749098  | 0.000456139 |
| PRSS21    | 1.089633523  | 5.513825515 | 3.706364706  | 0.000459642 |
| SAMD9     | -1.318180493 | 7.69579519  | -3.705760987 | 0.000460534 |
| FOSB      | -1.510883586 | 7.77567357  | -3.671912838 | 0.00051322  |
| HBB       | -1.576920574 | 8.122785537 | -3.646601146 | 0.000556332 |
| ENAH      | 1.181756675  | 8.4413312   | 3.630783934  | 0.000585005 |
| CTTN      | 1.028333576  | 7.954384196 | 3.618641462  | 0.000607968 |
| COX7A1    | -1.49578902  | 7.530549478 | -3.601042785 | 0.00064278  |
| GABRP     | -1.948538074 | 6.234039637 | -3.595171759 | 0.00065481  |
| SERPINB13 | -1.383334046 | 6.335424826 | -3.592297669 | 0.000660777 |
| RAB11FIP1 | -1.365794252 | 8.893797121 | -3.582795684 | 0.000680876 |
| PID1      | -1.177039201 | 5.456729126 | -3.562366576 | 0.000726079 |
| TSPAN8    | -1.239237836 | 4.65613534  | -3.555566226 | 0.000741749 |
| SPOCK1    | 1.122045394  | 6.714862236 | 3.553288066  | 0.000747071 |
| CXCL6     | 1.189228409  | 4.274094042 | 3.545020623  | 0.000766689 |
| AQP3      | -1.460419424 | 9.524240867 | -3.538473898 | 0.00078257  |
| EXPH5     | -1.076768654 | 6.567679189 | -3.534258121 | 0.000792962 |
| NID2      | 1.196106934  | 6.453910886 | 3.531721894  | 0.000799277 |
| IFI6      | 1.419663753  | 8.635600864 | 3.528445144  | 0.000807507 |
| CXCL11    | 1.076672906  | 4.179671679 | 3.523819054  | 0.000819263 |
| TMPRSS11D | -1.76050237  | 8.185798216 | -3.509665572 | 0.000856249 |
| RCAN2     | -1.623062256 | 6.934787228 | -3.509491884 | 0.000856713 |
| PXDN      | 1.329656667  | 7.331187266 | 3.508747143  | 0.000858703 |
| HELLS     | 1.007585433  | 6.472604434 | 3.48684183   | 0.000919255 |
| HPSE      | -1.349425046 | 7.085069086 | -3.478299953 | 0.000943948 |
| CALB1     | 1.850914307  | 4.709161186 | 3.462500127  | 0.000991291 |
| ANXA1     | -1.000909951 | 12.79840499 | -3.447175475 | 0.001039357 |
| ASPN      | 1.427223569  | 7.736474538 | 3.441446822  | 0.001057886 |
| CD24      | -1.458211048 | 10.8043091  | -3.440674442 | 0.001060408 |
| RNASE4    | -1.225884955 | 6.14754727  | -3.422215253 | 0.001122407 |
| PITX1     | -1.524607412 | 8.679760732 | -3.421173044 | 0.001126008 |
| VCAM1     | 1.081750869  | 7.306630994 | 3.417268321  | 0.001139596 |
| CASQ2     | -1.335291963 | 6.645665184 | -3.415785042 | 0.001144799 |
| VAV3      | -1.427682081 | 7.733291878 | -3.415495167 | 0.001145818 |
| DPT       | -1.326960232 | 5.841355401 | -3.397651338 | 0.001210249 |
| CEACAM6   | -2.067073326 | 9.528303564 | -3.396487034 | 0.00121457  |

|          |              |             |              |             |
|----------|--------------|-------------|--------------|-------------|
| IFI44L   | 1.348009376  | 6.458436329 | 3.394783182  | 0.00122092  |
| MLLT11   | 1.071647555  | 7.947486765 | 3.385041391  | 0.001257833 |
| AQP1     | -1.173841604 | 7.425721823 | -3.3720916   | 0.001308539 |
| C3orf14  | -1.100971441 | 7.263327961 | -3.365374245 | 0.001335597 |
| TIMP1    | 1.132352029  | 9.821106701 | 3.361198059  | 0.001352684 |
| DUOX1    | -1.140922905 | 7.150966183 | -3.342574417 | 0.001431434 |
| OGN      | -1.345855187 | 4.574174776 | -3.326641837 | 0.001502223 |
| MT1M     | -1.529292703 | 5.699970733 | -3.324082111 | 0.001513899 |
| COL4A2   | 1.161535749  | 8.435127804 | 3.32252123   | 0.001521062 |
| PCP4     | -1.664512503 | 7.158908649 | -3.315328923 | 0.001554479 |
| MPZL2    | -1.327493549 | 7.711391618 | -3.313022389 | 0.001565342 |
| CHRD1    | -1.752435313 | 6.999070165 | -3.300451194 | 0.001625817 |
| CDH19    | -1.354332868 | 4.976022482 | -3.280066609 | 0.001728585 |
| IL36RN   | -1.122158205 | 6.372678944 | -3.27916294  | 0.00173328  |
| EHF      | -1.857474206 | 6.577911828 | -3.26998637  | 0.001781638 |
| RHCG     | -2.279873901 | 10.43062812 | -3.259821126 | 0.001836689 |
| MAGEA12  | 1.212600908  | 4.737532409 | 3.257853209  | 0.00184753  |
| CCL20    | 1.405976308  | 6.609593005 | 3.239045382  | 0.001954223 |
| AMIGO2   | 1.046681393  | 7.675064184 | 3.235202904  | 0.001976722 |
| EGFL6    | 1.039877169  | 8.086389837 | 3.166092697  | 0.002425398 |
| ZNF91    | -1.247371289 | 8.251702397 | -3.151595303 | 0.002530919 |
| LCN2     | -1.672346759 | 9.4777671   | -3.106780262 | 0.00288496  |
| NACC2    | -1.000828104 | 7.327718182 | -3.099039642 | 0.002950619 |
| MAGEA1   | 1.066371302  | 5.084196296 | 3.095439196  | 0.002981633 |
| AOC3     | -1.337243668 | 7.520836513 | -3.087310213 | 0.003052781 |
| CST6     | -1.312094977 | 7.417402884 | -3.074571219 | 0.003167476 |
| AKR1C1   | 1.297879593  | 10.06479694 | 3.049082772  | 0.003409143 |
| KRT13    | -2.310328876 | 11.48046041 | -3.017071371 | 0.003737036 |
| LMOD1    | -1.13968492  | 6.443549208 | -2.926676892 | 0.004828322 |
| LGALS1   | 1.193082986  | 10.80002107 | 2.909370948  | 0.005068368 |
| PLN      | -1.521493978 | 5.791038956 | -2.90821703  | 0.00508476  |
| AZGP1    | -1.045676445 | 4.212655313 | -2.904552621 | 0.005137143 |
| MYH11    | -1.367957224 | 8.554116678 | -2.8903634   | 0.005344728 |
| TMEM35   | -1.082066856 | 5.544201184 | -2.868320925 | 0.005682652 |
| CXCL9    | 1.059880811  | 6.403919966 | 2.855961214  | 0.00588067  |
| S100B    | -1.003659156 | 4.826488471 | -2.839339076 | 0.006157036 |
| GPX2     | 1.154008156  | 9.769684474 | 2.830073566  | 0.006316243 |
| SPRR3    | -1.944323217 | 11.97742024 | -2.787733417 | 0.007093226 |
| CNN1     | -1.468896124 | 8.214522712 | -2.77173001  | 0.00740914  |
| PDZK1IP1 | -1.371587949 | 8.034430296 | -2.71639849  | 0.008603694 |
| FERMT1   | 1.003092564  | 8.684388797 | 2.63962465   | 0.010554236 |
| S100A12  | -1.457778002 | 7.622004171 | -2.552499677 | 0.013250299 |
| KRT14    | 1.590629347  | 11.61719857 | 2.524760578  | 0.014231471 |
| NMU      | -1.217787729 | 8.825563812 | -2.515985465 | 0.014555271 |
| SRPX     | -1.031508502 | 7.167159415 | -2.511589744 | 0.014719962 |
| KLK7     | -1.101581182 | 7.549946311 | -2.469257865 | 0.016394253 |
| PRKAR2B  | -1.159340431 | 6.721293198 | -2.469075777 | 0.016401812 |
| HSPB7    | -1.020374898 | 5.971994226 | -2.45705085  | 0.016907942 |
| ACTG2    | -1.382766162 | 9.689750285 | -2.447723794 | 0.017310147 |
| APOD     | -1.033500284 | 7.023699603 | -2.431455119 | 0.018032318 |
| BCHE     | -1.207619776 | 6.555984638 | -2.418858381 | 0.018609948 |

| adj.P.Val | B           |
|-----------|-------------|
| 1.52E-16  | 36.42393634 |
| 1.02E-13  | 29.47445612 |
| 2.48E-13  | 28.22389616 |
| 6.62E-13  | 26.82839987 |
| 6.62E-13  | 26.7742775  |
| 8.63E-13  | 26.33967189 |
| 2.24E-12  | 25.26198377 |
| 2.43E-12  | 25.05232484 |
| 3.44E-12  | 24.60172505 |
| 3.65E-12  | 24.44210979 |
| 4.24E-12  | 24.14798099 |
| 4.24E-12  | 24.11922338 |
| 4.80E-12  | 23.87569937 |
| 4.80E-12  | 23.84769589 |
| 5.23E-12  | 23.6968321  |
| 6.70E-12  | 23.34978933 |
| 6.70E-12  | 23.33374628 |
| 9.58E-12  | 22.91612259 |
| 1.02E-11  | 22.72156411 |
| 1.14E-11  | 22.52981359 |
| 1.14E-11  | 22.52081263 |
| 1.21E-11  | 22.42540753 |
| 1.90E-11  | 21.90457369 |
| 1.92E-11  | 21.85806514 |
| 2.25E-11  | 21.63146696 |
| 2.35E-11  | 21.55743638 |
| 2.36E-11  | 21.52109711 |
| 2.40E-11  | 21.47327854 |
| 2.47E-11  | 21.41725833 |
| 2.63E-11  | 21.31062956 |
| 2.63E-11  | 21.29775247 |
| 2.96E-11  | 21.13100055 |
| 2.96E-11  | 21.1146707  |
| 2.96E-11  | 21.10323257 |
| 3.83E-11  | 20.80180474 |
| 4.24E-11  | 20.64757139 |
| 4.24E-11  | 20.63834155 |
| 4.24E-11  | 20.63058096 |
| 5.10E-11  | 20.42374298 |
| 5.10E-11  | 20.40626564 |
| 5.44E-11  | 20.31475188 |
| 5.44E-11  | 20.30181397 |
| 5.62E-11  | 20.24965598 |
| 5.69E-11  | 20.21717421 |
| 5.70E-11  | 20.19496427 |
| 6.94E-11  | 19.9617871  |
| 6.94E-11  | 19.92591321 |
| 6.94E-11  | 19.91093543 |
| 8.28E-11  | 19.70426016 |

|          |             |
|----------|-------------|
| 8.28E-11 | 19.69518546 |
| 9.01E-11 | 19.58711969 |
| 9.29E-11 | 19.54132445 |
| 1.02E-10 | 19.40958027 |
| 1.24E-10 | 19.19753779 |
| 1.26E-10 | 19.15474002 |
| 1.26E-10 | 19.15162992 |
| 1.30E-10 | 19.1090571  |
| 1.34E-10 | 19.05949635 |
| 1.37E-10 | 19.02442822 |
| 1.46E-10 | 18.93910087 |
| 1.55E-10 | 18.86520661 |
| 1.57E-10 | 18.83513021 |
| 1.63E-10 | 18.78607155 |
| 1.64E-10 | 18.76605684 |
| 1.66E-10 | 18.74378811 |
| 1.73E-10 | 18.69169271 |
| 1.82E-10 | 18.63148391 |
| 1.84E-10 | 18.60615743 |
| 1.99E-10 | 18.51856754 |
| 2.02E-10 | 18.48927227 |
| 2.10E-10 | 18.44206057 |
| 2.51E-10 | 18.25560453 |
| 2.51E-10 | 18.24216576 |
| 2.60E-10 | 18.18589642 |
| 2.67E-10 | 18.13648747 |
| 2.76E-10 | 18.09552413 |
| 2.96E-10 | 17.99369057 |
| 3.22E-10 | 17.90121812 |
| 3.36E-10 | 17.84881634 |
| 4.18E-10 | 17.62501258 |
| 4.67E-10 | 17.50610804 |
| 4.73E-10 | 17.48461165 |
| 4.80E-10 | 17.46010927 |
| 5.25E-10 | 17.3414415  |
| 5.25E-10 | 17.3147467  |
| 5.46E-10 | 17.25658554 |
| 5.64E-10 | 17.21626534 |
| 5.71E-10 | 17.19503909 |
| 5.71E-10 | 17.18579797 |
| 6.01E-10 | 17.12649089 |
| 6.31E-10 | 17.07120016 |
| 6.34E-10 | 17.05479505 |
| 6.34E-10 | 17.04836624 |
| 6.39E-10 | 17.03183809 |
| 6.82E-10 | 16.96065823 |
| 6.90E-10 | 16.94032643 |
| 6.93E-10 | 16.92794959 |
| 8.20E-10 | 16.7460634  |
| 8.20E-10 | 16.73636404 |
| 8.20E-10 | 16.73118652 |
| 9.89E-10 | 16.52499483 |
| 9.89E-10 | 16.52375671 |



|          |             |
|----------|-------------|
| 1.02E-09 | 16.47748962 |
| 1.02E-09 | 16.47359603 |
| 1.03E-09 | 16.46099622 |
| 1.16E-09 | 16.32468818 |
| 1.16E-09 | 16.32179299 |
| 1.24E-09 | 16.22943669 |
| 1.29E-09 | 16.1846267  |
| 1.33E-09 | 16.14321864 |
| 1.40E-09 | 16.0854322  |
| 1.42E-09 | 16.06414902 |
| 1.43E-09 | 16.05346832 |
| 1.55E-09 | 15.94822433 |
| 1.59E-09 | 15.90865476 |
| 1.69E-09 | 15.84343847 |
| 1.74E-09 | 15.80046594 |
| 1.74E-09 | 15.79134475 |
| 1.78E-09 | 15.76582469 |
| 1.78E-09 | 15.75644511 |
| 2.25E-09 | 15.49499169 |
| 2.25E-09 | 15.49047953 |
| 2.41E-09 | 15.41070134 |
| 2.48E-09 | 15.37613151 |
| 2.78E-09 | 15.26033407 |
| 3.08E-09 | 15.14759005 |
| 3.11E-09 | 15.13258278 |
| 3.11E-09 | 15.12058802 |
| 3.16E-09 | 15.09981714 |
| 3.22E-09 | 15.07557964 |
| 3.27E-09 | 15.05267593 |
| 3.53E-09 | 14.95623912 |
| 3.89E-09 | 14.85378366 |
| 3.89E-09 | 14.84295169 |
| 3.89E-09 | 14.83740848 |
| 3.89E-09 | 14.83325056 |
| 3.98E-09 | 14.79980659 |
| 4.12E-09 | 14.75655895 |
| 4.53E-09 | 14.64711834 |
| 4.65E-09 | 14.61118083 |
| 4.65E-09 | 14.60684992 |
| 4.79E-09 | 14.57122292 |
| 4.87E-09 | 14.55004877 |
| 5.11E-09 | 14.48325217 |
| 5.54E-09 | 14.3991763  |
| 5.82E-09 | 14.32691897 |
| 5.94E-09 | 14.29723103 |
| 6.24E-09 | 14.24485547 |
| 6.39E-09 | 14.21696298 |
| 6.88E-09 | 14.13001234 |
| 7.21E-09 | 14.06939833 |
| 7.81E-09 | 13.98240065 |
| 8.54E-09 | 13.87771462 |
| 8.57E-09 | 13.86436121 |
| 8.58E-09 | 13.85906856 |

|          |             |
|----------|-------------|
| 9.32E-09 | 13.75631968 |
| 9.45E-09 | 13.73031534 |
| 9.47E-09 | 13.72333631 |
| 9.53E-09 | 13.71277443 |
| 9.74E-09 | 13.68371469 |
| 9.88E-09 | 13.6656155  |
| 9.96E-09 | 13.65004394 |
| 9.98E-09 | 13.64326081 |
| 1.01E-08 | 13.6269118  |
| 1.01E-08 | 13.62190611 |
| 1.07E-08 | 13.54219323 |
| 1.07E-08 | 13.53813187 |
| 1.08E-08 | 13.52463358 |
| 1.11E-08 | 13.49512281 |
| 1.13E-08 | 13.4718077  |
| 1.15E-08 | 13.450352   |
| 1.16E-08 | 13.43848504 |
| 1.16E-08 | 13.43529397 |
| 1.19E-08 | 13.38849482 |
| 1.19E-08 | 13.38820947 |
| 1.19E-08 | 13.38759645 |
| 1.20E-08 | 13.37949354 |
| 1.28E-08 | 13.30330591 |
| 1.30E-08 | 13.28364417 |
| 1.31E-08 | 13.27105597 |
| 1.35E-08 | 13.22939522 |
| 1.39E-08 | 13.18208206 |
| 1.56E-08 | 13.06697899 |
| 1.68E-08 | 12.97947982 |
| 1.75E-08 | 12.92480307 |
| 1.80E-08 | 12.89243702 |
| 1.84E-08 | 12.86852755 |
| 2.07E-08 | 12.74302874 |
| 2.09E-08 | 12.72774528 |
| 2.10E-08 | 12.72233647 |
| 2.10E-08 | 12.72028864 |
| 2.21E-08 | 12.66128964 |
| 2.24E-08 | 12.64152036 |
| 2.37E-08 | 12.58040072 |
| 2.50E-08 | 12.51961791 |
| 2.62E-08 | 12.46698752 |
| 2.62E-08 | 12.46673737 |
| 2.73E-08 | 12.42052693 |
| 2.74E-08 | 12.41134603 |
| 2.75E-08 | 12.40553796 |
| 2.81E-08 | 12.3709545  |
| 2.82E-08 | 12.36293189 |
| 2.89E-08 | 12.32543718 |
| 3.16E-08 | 12.20984092 |
| 3.16E-08 | 12.20938831 |
| 3.28E-08 | 12.16684947 |
| 3.43E-08 | 12.11841291 |
| 3.44E-08 | 12.11009926 |

|          |             |
|----------|-------------|
| 3.44E-08 | 12.10659074 |
| 3.50E-08 | 12.0767824  |
| 3.51E-08 | 12.07107355 |
| 3.60E-08 | 12.03922651 |
| 3.75E-08 | 11.98952367 |
| 4.05E-08 | 11.90238216 |
| 4.30E-08 | 11.83205327 |
| 4.38E-08 | 11.80768689 |
| 4.38E-08 | 11.80419287 |
| 4.41E-08 | 11.78815916 |
| 4.85E-08 | 11.67486503 |
| 5.02E-08 | 11.637511   |
| 5.26E-08 | 11.58534216 |
| 5.50E-08 | 11.54027946 |
| 5.97E-08 | 11.44357357 |
| 5.97E-08 | 11.44010175 |
| 6.06E-08 | 11.42219162 |
| 6.19E-08 | 11.39116434 |
| 6.73E-08 | 11.3026263  |
| 6.79E-08 | 11.28599666 |
| 7.25E-08 | 11.21025051 |
| 7.27E-08 | 11.19969554 |
| 7.27E-08 | 11.19612521 |
| 7.35E-08 | 11.18208826 |
| 7.35E-08 | 11.18011637 |
| 7.39E-08 | 11.17014626 |
| 7.52E-08 | 11.15120627 |
| 7.58E-08 | 11.14114791 |
| 7.97E-08 | 11.08934247 |
| 8.16E-08 | 11.06392067 |
| 8.90E-08 | 10.96192899 |
| 9.10E-08 | 10.93355265 |
| 9.46E-08 | 10.88498204 |
| 9.46E-08 | 10.88381256 |
| 9.87E-08 | 10.83775834 |
| 1.01E-07 | 10.81583716 |
| 1.13E-07 | 10.68381663 |
| 1.17E-07 | 10.64915841 |
| 1.20E-07 | 10.61196167 |
| 1.27E-07 | 10.54585368 |
| 1.28E-07 | 10.53792679 |
| 1.29E-07 | 10.51843585 |
| 1.37E-07 | 10.45977525 |
| 1.40E-07 | 10.42836951 |
| 1.43E-07 | 10.4042541  |
| 1.45E-07 | 10.39043497 |
| 1.46E-07 | 10.37676063 |
| 1.53E-07 | 10.31929714 |
| 1.54E-07 | 10.31242131 |
| 1.55E-07 | 10.30368798 |
| 1.63E-07 | 10.242039   |
| 1.63E-07 | 10.24005662 |
| 1.68E-07 | 10.20624179 |

|          |             |
|----------|-------------|
| 1.71E-07 | 10.18159308 |
| 1.78E-07 | 10.1296173  |
| 1.82E-07 | 10.10762527 |
| 1.87E-07 | 10.07843468 |
| 1.89E-07 | 10.06275325 |
| 1.93E-07 | 10.03747392 |
| 1.93E-07 | 10.03506518 |
| 1.95E-07 | 10.02079869 |
| 2.17E-07 | 9.911909841 |
| 2.24E-07 | 9.879623019 |
| 2.28E-07 | 9.856304407 |
| 2.36E-07 | 9.821359729 |
| 2.51E-07 | 9.75509868  |
| 2.53E-07 | 9.746898158 |
| 2.90E-07 | 9.586707279 |
| 3.10E-07 | 9.518629441 |
| 3.11E-07 | 9.510529451 |
| 3.15E-07 | 9.496471006 |
| 3.22E-07 | 9.470455178 |
| 3.23E-07 | 9.46302429  |
| 3.33E-07 | 9.433436187 |
| 3.81E-07 | 9.291335382 |
| 3.86E-07 | 9.275031939 |
| 4.05E-07 | 9.218414931 |
| 4.20E-07 | 9.176428418 |
| 4.22E-07 | 9.171687424 |
| 4.27E-07 | 9.153621269 |
| 4.36E-07 | 9.124077147 |
| 4.36E-07 | 9.123907064 |
| 4.43E-07 | 9.097691423 |
| 4.61E-07 | 9.046876205 |
| 5.09E-07 | 8.93954363  |
| 5.12E-07 | 8.931859088 |
| 5.15E-07 | 8.924051435 |
| 5.20E-07 | 8.910122873 |
| 5.20E-07 | 8.908013534 |
| 5.20E-07 | 8.905988433 |
| 5.53E-07 | 8.840449659 |
| 5.65E-07 | 8.816275308 |
| 5.76E-07 | 8.796320097 |
| 5.78E-07 | 8.7902614   |
| 6.00E-07 | 8.748502217 |
| 6.31E-07 | 8.697337097 |
| 6.47E-07 | 8.666364014 |
| 6.48E-07 | 8.663156502 |
| 6.73E-07 | 8.619502007 |
| 6.81E-07 | 8.605177451 |
| 6.95E-07 | 8.579901337 |
| 7.07E-07 | 8.562151015 |
| 7.12E-07 | 8.552958834 |
| 7.49E-07 | 8.498157101 |
| 7.61E-07 | 8.480203162 |
| 7.66E-07 | 8.469895512 |

|          |             |
|----------|-------------|
| 7.72E-07 | 8.458968163 |
| 8.14E-07 | 8.399723864 |
| 8.32E-07 | 8.37391601  |
| 8.68E-07 | 8.325173859 |
| 8.73E-07 | 8.317362495 |
| 8.91E-07 | 8.296146886 |
| 8.91E-07 | 8.295064991 |
| 8.95E-07 | 8.286083216 |
| 8.95E-07 | 8.285361701 |
| 9.30E-07 | 8.240663427 |
| 9.38E-07 | 8.228986883 |
| 1.00E-06 | 8.158720535 |
| 1.00E-06 | 8.157014927 |
| 1.01E-06 | 8.141180399 |
| 1.02E-06 | 8.128509721 |
| 1.06E-06 | 8.083180864 |
| 1.07E-06 | 8.077454416 |
| 1.07E-06 | 8.066247809 |
| 1.10E-06 | 8.041333159 |
| 1.11E-06 | 8.031680887 |
| 1.12E-06 | 8.018451642 |
| 1.13E-06 | 8.005209951 |
| 1.17E-06 | 7.971021146 |
| 1.17E-06 | 7.965151151 |
| 1.21E-06 | 7.924483964 |
| 1.22E-06 | 7.914968153 |
| 1.24E-06 | 7.899202051 |
| 1.27E-06 | 7.866154874 |
| 1.27E-06 | 7.864828298 |
| 1.27E-06 | 7.864420506 |
| 1.28E-06 | 7.856454835 |
| 1.30E-06 | 7.838900318 |
| 1.32E-06 | 7.822090875 |
| 1.36E-06 | 7.788102968 |
| 1.38E-06 | 7.769463217 |
| 1.44E-06 | 7.716329649 |
| 1.45E-06 | 7.706028235 |
| 1.46E-06 | 7.698272405 |
| 1.53E-06 | 7.638654119 |
| 1.53E-06 | 7.634876869 |
| 1.65E-06 | 7.547647193 |
| 1.68E-06 | 7.526779407 |
| 1.68E-06 | 7.523299466 |
| 1.75E-06 | 7.478784664 |
| 1.79E-06 | 7.457629042 |
| 1.79E-06 | 7.453782151 |
| 1.96E-06 | 7.355172785 |
| 2.00E-06 | 7.32981118  |
| 2.09E-06 | 7.276356393 |
| 2.26E-06 | 7.189488465 |
| 2.31E-06 | 7.165763449 |
| 2.36E-06 | 7.135575713 |
| 2.41E-06 | 7.112794652 |

|          |             |
|----------|-------------|
| 2.52E-06 | 7.065173968 |
| 2.56E-06 | 7.046611481 |
| 2.62E-06 | 7.022313889 |
| 2.66E-06 | 7.00355912  |
| 2.71E-06 | 6.97611039  |
| 2.73E-06 | 6.967921453 |
| 2.74E-06 | 6.960026492 |
| 2.89E-06 | 6.905853333 |
| 3.11E-06 | 6.826575805 |
| 3.24E-06 | 6.775822102 |
| 3.34E-06 | 6.741181371 |
| 3.35E-06 | 6.736426365 |
| 3.35E-06 | 6.736247176 |
| 3.48E-06 | 6.687679171 |
| 3.69E-06 | 6.616298765 |
| 3.72E-06 | 6.602327506 |
| 4.00E-06 | 6.516788629 |
| 4.28E-06 | 6.43330539  |
| 4.41E-06 | 6.400230489 |
| 4.45E-06 | 6.389710569 |
| 4.66E-06 | 6.335685537 |
| 4.66E-06 | 6.333648301 |
| 4.76E-06 | 6.307956023 |
| 4.88E-06 | 6.280709853 |
| 4.89E-06 | 6.27868489  |
| 5.07E-06 | 6.238112735 |
| 5.09E-06 | 6.231812849 |
| 5.33E-06 | 6.181882819 |
| 5.47E-06 | 6.155624005 |
| 5.51E-06 | 6.147553951 |
| 5.67E-06 | 6.116914255 |
| 5.81E-06 | 6.087038266 |
| 5.93E-06 | 6.061093226 |
| 5.93E-06 | 6.060791228 |
| 6.13E-06 | 6.022627865 |
| 6.23E-06 | 6.004404118 |
| 6.59E-06 | 5.94149041  |
| 6.60E-06 | 5.938321759 |
| 6.68E-06 | 5.924603343 |
| 7.18E-06 | 5.844787318 |
| 7.33E-06 | 5.819266066 |
| 7.67E-06 | 5.769551687 |
| 8.02E-06 | 5.718224182 |
| 8.02E-06 | 5.716884176 |
| 8.17E-06 | 5.695519582 |
| 8.21E-06 | 5.689449649 |
| 8.28E-06 | 5.680957081 |
| 8.85E-06 | 5.608434209 |
| 8.85E-06 | 5.607956184 |
| 9.30E-06 | 5.550109472 |
| 9.43E-06 | 5.534585252 |
| 9.45E-06 | 5.531152786 |
| 1.00E-05 | 5.468353676 |

|          |             |
|----------|-------------|
| 1.04E-05 | 5.422806599 |
| 1.04E-05 | 5.422613138 |
| 1.07E-05 | 5.391882113 |
| 1.09E-05 | 5.367013403 |
| 1.11E-05 | 5.345771389 |
| 1.12E-05 | 5.338909092 |
| 1.13E-05 | 5.33088833  |
| 1.18E-05 | 5.277681974 |
| 1.22E-05 | 5.239848278 |
| 1.22E-05 | 5.235364543 |
| 1.25E-05 | 5.211308496 |
| 1.29E-05 | 5.175462815 |
| 1.33E-05 | 5.142722671 |
| 1.35E-05 | 5.129106092 |
| 1.39E-05 | 5.092969994 |
| 1.43E-05 | 5.062599101 |
| 1.46E-05 | 5.039136657 |
| 1.48E-05 | 5.025117154 |
| 1.51E-05 | 5.002763572 |
| 1.54E-05 | 4.978839219 |
| 1.63E-05 | 4.915549939 |
| 1.64E-05 | 4.91235938  |
| 1.68E-05 | 4.881469996 |
| 1.69E-05 | 4.871096437 |
| 1.72E-05 | 4.853625741 |
| 1.73E-05 | 4.843206567 |
| 1.75E-05 | 4.831509053 |
| 1.82E-05 | 4.786987861 |
| 1.87E-05 | 4.75786474  |
| 1.89E-05 | 4.748392877 |
| 1.90E-05 | 4.73836068  |
| 1.92E-05 | 4.73055512  |
| 2.02E-05 | 4.669151852 |
| 2.04E-05 | 4.658024031 |
| 2.07E-05 | 4.640522052 |
| 2.13E-05 | 4.609801446 |
| 2.26E-05 | 4.533222313 |
| 2.30E-05 | 4.517444326 |
| 2.42E-05 | 4.457519618 |
| 2.43E-05 | 4.45394487  |
| 2.49E-05 | 4.425761594 |
| 2.54E-05 | 4.402448745 |
| 2.83E-05 | 4.28202208  |
| 2.87E-05 | 4.265393413 |
| 2.91E-05 | 4.253909457 |
| 2.91E-05 | 4.250179105 |
| 2.98E-05 | 4.224498132 |
| 3.00E-05 | 4.215791524 |
| 3.03E-05 | 4.206925016 |
| 3.04E-05 | 4.201261949 |
| 3.20E-05 | 4.145461442 |
| 3.27E-05 | 4.120181569 |
| 3.30E-05 | 4.106503164 |

|             |             |
|-------------|-------------|
| 3.44E-05    | 4.056653596 |
| 3.53E-05    | 4.024290863 |
| 3.55E-05    | 4.019764447 |
| 3.57E-05    | 4.01258136  |
| 3.73E-05    | 3.963542277 |
| 3.77E-05    | 3.94768768  |
| 3.89E-05    | 3.914407534 |
| 3.90E-05    | 3.910933203 |
| 4.18E-05    | 3.840228347 |
| 4.25E-05    | 3.820135618 |
| 4.25E-05    | 3.819077443 |
| 4.46E-05    | 3.766030651 |
| 4.51E-05    | 3.750067435 |
| 4.72E-05    | 3.704665397 |
| 4.73E-05    | 3.700478651 |
| 4.75E-05    | 3.696532989 |
| 4.94E-05    | 3.652390226 |
| 4.94E-05    | 3.651324269 |
| 5.02E-05    | 3.633542516 |
| 5.11E-05    | 3.615023765 |
| 5.18E-05    | 3.599310719 |
| 5.91E-05    | 3.452210398 |
| 5.94E-05    | 3.44553884  |
| 5.96E-05    | 3.439574796 |
| 6.19E-05    | 3.397568853 |
| 6.29E-05    | 3.380076856 |
| 6.38E-05    | 3.36390424  |
| 6.39E-05    | 3.360964458 |
| 6.41E-05    | 3.357335317 |
| 6.60E-05    | 3.327221554 |
| 6.67E-05    | 3.313562483 |
| 6.72E-05    | 3.304101285 |
| 6.97E-05    | 3.26341646  |
| 7.35E-05    | 3.204132928 |
| 7.41E-05    | 3.194297005 |
| 7.72E-05    | 3.149159597 |
| 7.85E-05    | 3.131503934 |
| 8.40E-05    | 3.057611854 |
| 8.48E-05    | 3.047718185 |
| 9.19E-05    | 2.956670096 |
| 9.19E-05    | 2.955648231 |
| 9.42E-05    | 2.929287647 |
| 9.50E-05    | 2.918384675 |
| 9.60E-05    | 2.906535708 |
| 9.75E-05    | 2.889073626 |
| 9.84E-05    | 2.878195359 |
| 0.000100062 | 2.860163482 |
| 0.000101842 | 2.841359825 |
| 0.000106719 | 2.788991666 |
| 0.000110654 | 2.748119769 |
| 0.000112644 | 2.728780191 |
| 0.000114544 | 2.707649606 |
| 0.000115633 | 2.697351189 |



|             |             |
|-------------|-------------|
| 0.000115928 | 2.693572801 |
| 0.000116833 | 2.682609269 |
| 0.000118657 | 2.665938453 |
| 0.000119399 | 2.657553784 |
| 0.000121564 | 2.635450048 |
| 0.000121564 | 2.634924671 |
| 0.000149594 | 2.403749727 |
| 0.000150614 | 2.395961716 |
| 0.000152312 | 2.383228236 |
| 0.000160291 | 2.324262219 |
| 0.000161766 | 2.310392173 |
| 0.000163956 | 2.296371276 |
| 0.000173194 | 2.234293621 |
| 0.000176905 | 2.208415292 |
| 0.000176965 | 2.207537762 |
| 0.000176967 | 2.206969904 |
| 0.000183757 | 2.164269646 |
| 0.00018395  | 2.16271241  |
| 0.000189887 | 2.126798849 |
| 0.000191714 | 2.115988427 |
| 0.000192826 | 2.108813106 |
| 0.000194309 | 2.098798441 |
| 0.000195456 | 2.091491066 |
| 0.000205157 | 2.0380786   |
| 0.000216346 | 1.980266901 |
| 0.000226269 | 1.928832833 |
| 0.000242433 | 1.851757009 |
| 0.000246396 | 1.83259247  |
| 0.000253344 | 1.801317073 |
| 0.000254562 | 1.795693787 |
| 0.000261886 | 1.765064867 |
| 0.000266234 | 1.747651244 |
| 0.00026855  | 1.737825599 |
| 0.000269114 | 1.735307702 |
| 0.000280207 | 1.690031119 |
| 0.000288745 | 1.658282213 |
| 0.000297192 | 1.626159718 |
| 0.000298744 | 1.61916322  |
| 0.000306797 | 1.588209439 |
| 0.000314198 | 1.563928318 |
| 0.000319209 | 1.54581447  |
| 0.000321416 | 1.538231832 |
| 0.000324772 | 1.526815896 |
| 0.000334047 | 1.495450074 |
| 0.000334374 | 1.494019701 |
| 0.000337761 | 1.481429983 |
| 0.00034072  | 1.470144087 |
| 0.000343228 | 1.462158093 |
| 0.00034495  | 1.456395769 |
| 0.000346296 | 1.451367264 |
| 0.00035132  | 1.436473517 |
| 0.00035475  | 1.423289252 |
| 0.000365048 | 1.389432932 |

|             |              |
|-------------|--------------|
| 0.000369849 | 1.372837401  |
| 0.000382956 | 1.334312299  |
| 0.000400576 | 1.28756133   |
| 0.00040585  | 1.274128941  |
| 0.000432262 | 1.203094906  |
| 0.000433963 | 1.197392416  |
| 0.000438211 | 1.185832556  |
| 0.000442382 | 1.173989776  |
| 0.00044334  | 1.171460953  |
| 0.000444518 | 1.167064922  |
| 0.000447228 | 1.160335923  |
| 0.000471369 | 1.103259013  |
| 0.000512861 | 1.008849409  |
| 0.000520362 | 0.991642105  |
| 0.000564144 | 0.902101216  |
| 0.000583601 | 0.865361202  |
| 0.000597167 | 0.839493388  |
| 0.000606266 | 0.823775195  |
| 0.000635407 | 0.771177191  |
| 0.000643232 | 0.758657229  |
| 0.000654455 | 0.740890956  |
| 0.000659936 | 0.730774668  |
| 0.000688008 | 0.683337919  |
| 0.000701852 | 0.659219549  |
| 0.000706434 | 0.651744389  |
| 0.000717955 | 0.63464987   |
| 0.000719359 | 0.63236465   |
| 0.00075379  | 0.582253717  |
| 0.000765145 | 0.566895428  |
| 0.000808608 | 0.506368639  |
| 0.000859743 | 0.437666157  |
| 0.000884777 | 0.40575222   |
| 0.00093504  | 0.34106426   |
| 0.000935154 | 0.34053969   |
| 0.0009763   | 0.291962859  |
| 0.001011082 | 0.254321267  |
| 0.001019589 | 0.245168144  |
| 0.001039434 | 0.222072556  |
| 0.001052221 | 0.208992215  |
| 0.001052221 | 0.208882208  |
| 0.001071916 | 0.187714065  |
| 0.001246839 | 0.021735782  |
| 0.001254021 | 0.015911591  |
| 0.001324275 | -0.044936976 |
| 0.001380779 | -0.096674022 |
| 0.001399456 | -0.110893012 |
| 0.001404432 | -0.114627293 |
| 0.001408821 | -0.117955871 |
| 0.001426379 | -0.134029635 |
| 0.00151692  | -0.197233221 |
| 0.001556453 | -0.224900284 |
| 0.00155792  | -0.226162923 |
| 0.001561108 | -0.228552785 |

|             |              |
|-------------|--------------|
| 0.001598825 | -0.254732321 |
| 0.001668074 | -0.300635858 |
| 0.001758686 | -0.360138704 |
| 0.001821027 | -0.40098868  |
| 0.001822169 | -0.401941226 |
| 0.001880454 | -0.434519127 |
| 0.00190472  | -0.45096825  |
| 0.001912828 | -0.456221816 |
| 0.001918473 | -0.460115251 |
| 0.001943333 | -0.474131697 |
| 0.001952717 | -0.479614972 |
| 0.001953403 | -0.480429279 |
| 0.001953878 | -0.481141127 |
| 0.001966178 | -0.48941905  |
| 0.001987956 | -0.501928329 |
| 0.002014399 | -0.515501309 |
| 0.002042837 | -0.530769731 |
| 0.002130122 | -0.576860581 |
| 0.002145376 | -0.584064676 |
| 0.002147445 | -0.585888265 |
| 0.002363262 | -0.6878327   |
| 0.002530213 | -0.763682516 |
| 0.002645278 | -0.810912362 |
| 0.002732371 | -0.847081008 |
| 0.002859128 | -0.899364786 |
| 0.002906457 | -0.9167707   |
| 0.00293087  | -0.925284919 |
| 0.003010442 | -0.953402523 |
| 0.003183381 | -1.013692438 |
| 0.003243021 | -1.033712066 |
| 0.003262876 | -1.040413227 |
| 0.003335787 | -1.064708354 |
| 0.003396451 | -1.083920818 |
| 0.003431066 | -1.096280497 |
| 0.003454816 | -1.103711503 |
| 0.003484387 | -1.113307055 |
| 0.003526625 | -1.126844093 |
| 0.003663216 | -1.168188446 |
| 0.00366395  | -1.168695137 |
| 0.003669961 | -1.170867546 |
| 0.003898211 | -1.234629868 |
| 0.003990788 | -1.259422433 |
| 0.004160728 | -1.305175058 |
| 0.004332841 | -1.349419702 |
| 0.004395519 | -1.365925694 |
| 0.004404502 | -1.368149758 |
| 0.004610134 | -1.421203695 |
| 0.004621898 | -1.42419344  |
| 0.004671564 | -1.435389339 |
| 0.004688296 | -1.439640057 |
| 0.004690939 | -1.440470626 |
| 0.004901937 | -1.491506648 |
| 0.00491468  | -1.494830482 |

|             |              |
|-------------|--------------|
| 0.004935599 | -1.499693225 |
| 0.005059333 | -1.527464408 |
| 0.005235824 | -1.564297208 |
| 0.005325411 | -1.583365561 |
| 0.005390119 | -1.59520737  |
| 0.005669707 | -1.647893946 |
| 0.00591091  | -1.692808871 |
| 0.005949392 | -1.700011205 |
| 0.005975667 | -1.70440121  |
| 0.006095502 | -1.724611435 |
| 0.006130434 | -1.731086378 |
| 0.006321894 | -1.766321977 |
| 0.006645309 | -1.823261163 |
| 0.006657238 | -1.82577969  |
| 0.006817931 | -1.851327548 |
| 0.006990227 | -1.879569884 |
| 0.007020839 | -1.88503033  |
| 0.007368266 | -1.937101103 |
| 0.007435224 | -1.947713375 |
| 0.008760477 | -2.13706913  |
| 0.009078895 | -2.176423123 |
| 0.010157262 | -2.29725916  |
| 0.010350676 | -2.318004514 |
| 0.010450708 | -2.327641231 |
| 0.010634234 | -2.349368991 |
| 0.010940128 | -2.383335624 |
| 0.01165611  | -2.450990718 |
| 0.012619034 | -2.535377684 |
| 0.015740656 | -2.770119181 |
| 0.016409889 | -2.814453624 |
| 0.016444935 | -2.81740273  |
| 0.016558149 | -2.826762161 |
| 0.017095501 | -2.862919834 |
| 0.018011092 | -2.918824848 |
| 0.018540365 | -2.950030457 |
| 0.019275133 | -2.99183659  |
| 0.019690986 | -3.015059615 |
| 0.021661183 | -3.120442348 |
| 0.022480516 | -3.1599566   |
| 0.025498145 | -3.295220231 |
| 0.030064596 | -3.479370074 |
| 0.03611827  | -3.683278752 |
| 0.038207204 | -3.747049877 |
| 0.038934032 | -3.767106675 |
| 0.039315898 | -3.777132552 |
| 0.042982677 | -3.872957065 |
| 0.04299351  | -3.873366391 |
| 0.044053333 | -3.900343539 |
| 0.044905463 | -3.92119424  |
| 0.046461915 | -3.957407887 |
| 0.047666386 | -3.985312053 |
