# Supplementary material for: Weighted Gene Correlation Network Analysis Identifies Specific Functional Modules and Genes in Esophageal Cancer
Source: Hindawi journal article supplement (doi:10.1155/2021/8223263), 2021-12-27
Supplement: f1 [file 8223263.f1.zip]

Supplementary table 1. The detailed information of DEGs between ESCA tumors and normal tissues in TCGA cohort.

| ID       | logFC        | AveExpr      | t            | P.Value  |
|----------|--------------|--------------|--------------|----------|
| TPX2     | 3.100966191  | 6.713060899  | 12.33809323  | 1.78E-25 |
| NEK2     | 3.082716264  | 4.197880299  | 11.41772488  | 7.56E-23 |
| KIF18B   | 2.989041773  | 5.126892699  | 11.39434082  | 8.81E-23 |
| UBE2C    | 3.055240616  | 5.55299974   | 11.1745889   | 3.71E-22 |
| BIRC5    | 3.041871898  | 5.063380147  | 11.00005687  | 1.16E-21 |
| BUB1     | 2.786567419  | 5.205940831  | 10.83029452  | 3.50E-21 |
| KIF4A    | 2.796139841  | 4.801704968  | 10.7192843   | 7.19E-21 |
| PGA4     | -7.195333751 | -3.889373426 | -10.71871028 | 7.22E-21 |
| NCAPH    | 2.767874699  | 4.362417898  | 10.67645615  | 9.50E-21 |
| KIFC1    | 2.625496735  | 4.611675883  | 10.63737468  | 1.22E-20 |
| EXO1     | 2.877478964  | 3.820513429  | 10.62093259  | 1.36E-20 |
| KIF23    | 2.470268676  | 5.116677858  | 10.59512     | 1.61E-20 |
| KIF2C    | 2.58650047   | 5.057273651  | 10.59189731  | 1.64E-20 |
| TROAP    | 2.713930634  | 4.579350385  | 10.56591814  | 1.94E-20 |
| NUF2     | 2.887325504  | 3.940917499  | 10.54694176  | 2.20E-20 |
| DLGAP5   | 2.80601708   | 4.69724106   | 10.4862287   | 3.25E-20 |
| CDC45    | 2.983537502  | 3.796527196  | 10.48245585  | 3.33E-20 |
| CCKAR    | -5.679725654 | -3.457995171 | -10.4432435  | 4.29E-20 |
| BUB1B    | 2.720591514  | 4.888372615  | 10.43378625  | 4.56E-20 |
| MELK     | 2.671251042  | 4.709907962  | 10.38138808  | 6.40E-20 |
| CENPA    | 2.977149613  | 3.207867968  | 10.26039278  | 1.39E-19 |
| AURKB    | 2.955991145  | 4.313623259  | 10.23440784  | 1.65E-19 |
| CDCA5    | 2.798166631  | 4.568058689  | 10.22286248  | 1.78E-19 |
| UBE2T    | 2.517558374  | 4.16936144   | 10.1602787   | 2.65E-19 |
| GTSE1    | 2.458733036  | 4.266268807  | 10.14491434  | 2.93E-19 |
| KIF18A   | 2.663734251  | 3.819925566  | 10.13947772  | 3.03E-19 |
| NUSAP1   | 2.541902422  | 5.668934261  | 10.1308345   | 3.20E-19 |
| KIF14    | 2.817827292  | 4.342246435  | 10.12996984  | 3.22E-19 |
| CENPF    | 2.737382993  | 6.822704727  | 10.11844204  | 3.47E-19 |
| CDC20    | 2.832993998  | 5.578501183  | 10.11364144  | 3.58E-19 |
| CEP55    | 2.837587342  | 5.350958494  | 10.08810968  | 4.21E-19 |
| CKAP2L   | 2.703709594  | 4.242547318  | 10.08232081  | 4.37E-19 |
| CDK1     | 2.442452664  | 5.623284555  | 10.07247745  | 4.66E-19 |
| ASPM     | 2.775845999  | 5.695755779  | 10.07112357  | 4.70E-19 |
| MCM10    | 2.925621016  | 3.689437272  | 10.06824389  | 4.79E-19 |
| CLSPN    | 2.283316026  | 4.323212334  | 10.0427611   | 5.63E-19 |
| PDILT    | -5.442997467 | -3.717823109 | -10.03334822 | 5.98E-19 |
| DEPDC1   | 2.7309022    | 4.466400028  | 9.978967499  | 8.47E-19 |
| MYBL2    | 3.015927006  | 6.427914251  | 9.908669504  | 1.33E-18 |
| CHIA     | -7.241670634 | -3.56948624  | -9.829448543 | 2.20E-18 |
| KIF11    | 2.260867933  | 5.799372842  | 9.796076427  | 2.72E-18 |
| SKA3     | 2.681463742  | 3.950515909  | 9.773846079  | 3.13E-18 |
| ASF1B    | 2.50922918   | 4.762263773  | 9.760875923  | 3.40E-18 |
| HJURP    | 2.752706679  | 4.235234008  | 9.600912854  | 9.36E-18 |
| C16orf89 | -5.855774903 | -1.095843728 | -9.600860509 | 9.37E-18 |
| CDCA2    | 2.609980886  | 3.815820825  | 9.594714525  | 9.74E-18 |
| PGA5     | -9.099492378 | -2.781306811 | -9.589609189 | 1.01E-17 |
| RRM2     | 2.736106853  | 6.342134255  | 9.589208058  | 1.01E-17 |
| MAD2L1   | 2.281962926  | 4.939386194  | 9.581729662  | 1.06E-17 |
| NCAPG    | 2.456828831  | 4.669301644  | 9.579530786  | 1.07E-17 |

|           |              |              |              |          |
|-----------|--------------|--------------|--------------|----------|
| CKMT2     | -3.632011249 | -0.07711993  | -9.576718356 | 1.09E-17 |
| ECT2      | 2.382943374  | 6.715365583  | 9.534938686  | 1.42E-17 |
| CKS2      | 2.365566153  | 5.095823731  | 9.481275562  | 1.99E-17 |
| KIF20A    | 2.778835254  | 4.897263622  | 9.464293718  | 2.22E-17 |
| TMED6     | -3.367721167 | -0.321791065 | -9.462411235 | 2.24E-17 |
| HROB      | 2.442321474  | 3.162984042  | 9.454505971  | 2.36E-17 |
| HOXC9     | 3.805074702  | 1.234093332  | 9.454383468  | 2.36E-17 |
| ANLN      | 2.826659933  | 6.484597865  | 9.451286192  | 2.41E-17 |
| RAD54L    | 2.306193771  | 3.244724027  | 9.405214357  | 3.22E-17 |
| ATP4B     | -8.11483615  | -2.818128331 | -9.402227425 | 3.28E-17 |
| CDKN3     | 2.441015417  | 3.710543154  | 9.385776411  | 3.63E-17 |
| GPB1      | -3.912265954 | 1.418990651  | -9.380312787 | 3.76E-17 |
| WDR62     | 2.30697301   | 4.512801319  | 9.373729608  | 3.92E-17 |
| POLQ      | 2.537448746  | 4.390923343  | 9.36841379   | 4.05E-17 |
| MKI67     | 2.568080952  | 7.741270397  | 9.367200201  | 4.08E-17 |
| ORC1      | 2.567219656  | 3.508126281  | 9.298264975  | 6.29E-17 |
| IQGAP3    | 2.482318686  | 5.931304293  | 9.292182692  | 6.53E-17 |
| STIL      | 2.242000136  | 4.841547396  | 9.258640586  | 8.06E-17 |
| SLC1A2    | -4.46343357  | -0.093975723 | -9.252886853 | 8.36E-17 |
| PTTG1     | 2.677352773  | 4.81978777   | 9.218124897  | 1.04E-16 |
| PLK1      | 2.350398904  | 5.812448695  | 9.21274798   | 1.07E-16 |
| PBK       | 2.587637345  | 4.190930224  | 9.163255315  | 1.46E-16 |
| RAD51AP1  | 2.380828858  | 3.936624943  | 9.160981654  | 1.48E-16 |
| TK1       | 2.574953664  | 6.127411451  | 9.153661028  | 1.55E-16 |
| GHRL      | -4.898859141 | -0.43374209  | -9.145465349 | 1.63E-16 |
| CDCA8     | 2.149457196  | 4.813443438  | 9.143642392  | 1.65E-16 |
| NDC80     | 2.496770556  | 4.01021961   | 9.136549368  | 1.73E-16 |
| PKMYT1    | 2.842566401  | 4.73892496   | 9.133196739  | 1.76E-16 |
| STX12     | -1.57616473  | 5.63078495   | -9.122751985 | 1.88E-16 |
| SGO1      | 2.169207309  | 3.182877925  | 9.113344784  | 2.00E-16 |
| TRIM50    | -5.33156867  | -2.81254641  | -9.110514447 | 2.03E-16 |
| HOXB7     | 3.280761639  | 3.457717547  | 9.077042898  | 2.50E-16 |
| GIN5      | 2.328527704  | 4.370119019  | 9.068660903  | 2.63E-16 |
| FANCA     | 1.984893302  | 4.760635243  | 9.064601247  | 2.70E-16 |
| DTL       | 2.460936898  | 4.722006647  | 9.063398939  | 2.72E-16 |
| BLM       | 2.113162382  | 3.857808237  | 9.061593011  | 2.75E-16 |
| SIK2      | -1.837702917 | 5.93426096   | -9.06145912  | 2.76E-16 |
| PRC1      | 2.100530602  | 5.849676133  | 9.056049728  | 2.85E-16 |
| CCKBR     | -5.959890253 | -2.781483528 | -9.034622345 | 3.25E-16 |
| PGA3      | -8.946028267 | -2.856215777 | -9.032809882 | 3.29E-16 |
| E2F7      | 2.949259155  | 3.955277161  | 8.991259245  | 4.26E-16 |
| SHCBP1    | 2.252062743  | 3.87250988   | 8.986689893  | 4.38E-16 |
| CDC6      | 2.858713855  | 4.863646557  | 8.948645878  | 5.54E-16 |
| KNL1      | 2.272249779  | 4.998701551  | 8.943179938  | 5.73E-16 |
| TOP2A     | 2.979956513  | 7.755674745  | 8.9415318    | 5.79E-16 |
| MTFR2     | 2.418028761  | 2.520011996  | 8.935073686  | 6.03E-16 |
| CDCA3     | 2.267852732  | 4.167098318  | 8.933982015  | 6.07E-16 |
| CDC25C    | 2.327682323  | 2.530312769  | 8.926859812  | 6.34E-16 |
| PRR11     | 2.47499162   | 5.078465624  | 8.916241042  | 6.77E-16 |
| SKA1      | 2.512085588  | 3.163681726  | 8.907497142  | 7.15E-16 |
| AURKA     | 2.174876408  | 4.912395405  | 8.902282445  | 7.38E-16 |
| ARHGAP11A | 2.059473004  | 5.372917058  | 8.878653715  | 8.54E-16 |
| CENPI     | 2.2025043    | 2.995866283  | 8.844557626  | 1.05E-15 |

|          |              |              |              |          |
|----------|--------------|--------------|--------------|----------|
| CCNA2    | 2.22333008   | 5.271714268  | 8.827997718  | 1.17E-15 |
| CCNB1    | 2.323627606  | 5.516448822  | 8.826930209  | 1.17E-15 |
| SGO2     | 1.90491368   | 3.91829909   | 8.826144631  | 1.18E-15 |
| HOXC8    | 3.818778294  | 1.172284254  | 8.820211422  | 1.22E-15 |
| PCLAF    | 2.382663868  | 4.861039623  | 8.809702259  | 1.31E-15 |
| FOXM1    | 2.551306736  | 6.317266702  | 8.806685315  | 1.33E-15 |
| EME1     | 2.197461103  | 2.265832958  | 8.763774085  | 1.73E-15 |
| PLK4     | 2.012514261  | 4.087511058  | 8.757898754  | 1.80E-15 |
| CCNB2    | 2.470166247  | 5.112073006  | 8.7406317    | 2.00E-15 |
| KIF15    | 2.148537958  | 3.847940488  | 8.732042235  | 2.10E-15 |
| ATP4A    | -8.004379658 | -2.12296728  | -8.724148649 | 2.21E-15 |
| SIGLEC11 | -4.353850863 | -1.791915029 | -8.718633639 | 2.28E-15 |
| KCNE2    | -6.096532428 | -1.676967793 | -8.717063806 | 2.31E-15 |
| RECQL4   | 2.165227446  | 5.113831396  | 8.709577344  | 2.42E-15 |
| ORC6     | 2.110018015  | 3.37132536   | 8.685590725  | 2.80E-15 |
| CENPE    | 2.182428306  | 4.973000468  | 8.675192278  | 2.98E-15 |
| UHRF1    | 2.258275016  | 4.774298982  | 8.619223754  | 4.20E-15 |
| CKAP2    | 2.064596217  | 5.649320117  | 8.604742814  | 4.58E-15 |
| RAD51    | 2.214096121  | 3.423199687  | 8.586546572  | 5.12E-15 |
| ESRRB    | -3.988457942 | -1.621386138 | -8.575577842 | 5.48E-15 |
| TICRR    | 2.484719787  | 4.539905177  | 8.564550152  | 5.86E-15 |
| CENPK    | 2.038136364  | 3.265550868  | 8.556267028  | 6.16E-15 |
| CENPM    | 2.173487311  | 3.009647041  | 8.514060884  | 7.96E-15 |
| GRIA4    | -4.290141779 | -2.187425452 | -8.47771233  | 9.93E-15 |
| UBE2S    | 2.091238126  | 5.425226833  | 8.46773845   | 1.05E-14 |
| KPNA2    | 1.891923171  | 7.205667632  | 8.422828142  | 1.38E-14 |
| MTURN    | -2.281980603 | 4.415801303  | -8.405184686 | 1.54E-14 |
| DDIAS    | 2.453465457  | 3.625584679  | 8.333350969  | 2.38E-14 |
| CDT1     | 2.375997074  | 4.883970646  | 8.33221523   | 2.39E-14 |
| LMNB1    | 1.921036257  | 5.537414486  | 8.32091166   | 2.56E-14 |
| TRIP13   | 2.649312761  | 4.727521222  | 8.316751559  | 2.63E-14 |
| HOXC6    | 3.359431665  | 2.05142462   | 8.304803183  | 2.82E-14 |
| ALAD     | -1.526292209 | 5.406079879  | -8.298923054 | 2.92E-14 |
| AQP4     | -5.599154113 | -2.686513421 | -8.29515117  | 2.99E-14 |
| MLYCD    | -1.352114139 | 3.421236471  | -8.293120803 | 3.03E-14 |
| C1orf112 | 1.412218654  | 3.451899034  | 8.269897953  | 3.48E-14 |
| TBC1D31  | 1.522638208  | 3.724705568  | 8.258398682  | 3.73E-14 |
| HMMR     | 2.36705541   | 4.508344578  | 8.242948937  | 4.09E-14 |
| CIP2A    | 2.096560769  | 3.917223647  | 8.232375043  | 4.36E-14 |
| ETNPPL   | -5.07554088  | -3.024222137 | -8.228011345 | 4.47E-14 |
| TIMELESS | 1.672019099  | 5.616116851  | 8.195219088  | 5.44E-14 |
| CKS1B    | 1.764791836  | 4.843729451  | 8.176404622  | 6.09E-14 |
| LIPF     | -11.14392476 | -0.838610797 | -8.153569703 | 6.98E-14 |
| PARBPB   | 1.940974084  | 3.535895046  | 8.146601431  | 7.28E-14 |
| SIDT2    | -1.679703468 | 5.671471921  | -8.129767716 | 8.05E-14 |
| RGMB     | -1.985575364 | 3.912412862  | -8.123374388 | 8.36E-14 |
| WDHD1    | 1.951986244  | 4.408991109  | 8.119172093  | 8.57E-14 |
| CKM      | -4.420330373 | -1.772276598 | -8.049744994 | 1.30E-13 |
| FANCI    | 1.781008744  | 5.830012768  | 8.040003058  | 1.37E-13 |
| SPC24    | 1.981000709  | 2.984522917  | 8.018770689  | 1.56E-13 |
| TEDC2    | 2.301104229  | 2.378826107  | 7.939125385  | 2.49E-13 |
| CCNF     | 1.812600366  | 4.879605632  | 7.930976184  | 2.62E-13 |
| CDC25B   | 2.192633123  | 6.808791499  | 7.924601622  | 2.72E-13 |

|          |              |              |              |          |
|----------|--------------|--------------|--------------|----------|
| MTBP     | 1.693996561  | 3.317895486  | 7.922468063  | 2.75E-13 |
| DEPDC1B  | 2.255973102  | 3.738169949  | 7.914234864  | 2.89E-13 |
| CRY2     | -1.444927616 | 4.764918418  | -7.894540865 | 3.24E-13 |
| MCM4     | 1.895707988  | 6.965796538  | 7.891825039  | 3.30E-13 |
| FANCB    | 1.868784443  | 1.425132966  | 7.884437993  | 3.44E-13 |
| SH3GL2   | -4.764170756 | -2.460630013 | -7.869407438 | 3.76E-13 |
| KNTC1    | 1.588410494  | 5.759626895  | 7.863779681  | 3.89E-13 |
| KIF22    | 1.378906689  | 5.604830135  | 7.85944707   | 3.99E-13 |
| HASPIN   | 1.879253194  | 2.914300347  | 7.854408546  | 4.11E-13 |
| ERCC6L   | 2.076980826  | 3.010253551  | 7.834590123  | 4.61E-13 |
| BRIP1    | 1.860729602  | 3.866553213  | 7.789726844  | 6.00E-13 |
| PIMREG   | 2.432635805  | 2.898448625  | 7.773139902  | 6.61E-13 |
| NBPF12   | -1.933938723 | 3.543546941  | -7.772520246 | 6.64E-13 |
| CHEK1    | 1.769399715  | 4.375322245  | 7.771896869  | 6.66E-13 |
| CBLIF    | -7.737890459 | -1.965951322 | -7.770819228 | 6.70E-13 |
| HOXC11   | 4.069845657  | 1.425393875  | 7.762469675  | 7.04E-13 |
| FAM72B   | 2.403116586  | 0.950167877  | 7.737665125  | 8.14E-13 |
| XRCC2    | 2.230417708  | 3.288311989  | 7.732298893  | 8.40E-13 |
| EZH2     | 1.588930314  | 4.666539644  | 7.726789961  | 8.67E-13 |
| FAM72A   | 2.109197221  | 0.573978315  | 7.721901908  | 8.92E-13 |
| GPR155   | -3.157082185 | 4.089255766  | -7.705915828 | 9.79E-13 |
| NEIL3    | 2.512497074  | 2.05872128   | 7.661993897  | 1.26E-12 |
| MCM2     | 2.230943077  | 6.214150174  | 7.640306905  | 1.43E-12 |
| FAM72D   | 2.208434076  | 0.263597975  | 7.624723197  | 1.57E-12 |
| CENPW    | 2.235445526  | 3.454807231  | 7.613529218  | 1.67E-12 |
| CPA2     | -5.885737965 | -2.358591952 | -7.609294855 | 1.72E-12 |
| TDO2     | 3.190745114  | 1.49467616   | 7.606709857  | 1.74E-12 |
| PLCXD3   | -5.267079593 | -1.613629753 | -7.604351512 | 1.77E-12 |
| ULBP2    | 3.791592148  | 2.308699899  | 7.598748087  | 1.82E-12 |
| CCDC150  | 1.996928822  | 1.725904996  | 7.596990932  | 1.84E-12 |
| PCNA     | 1.627642054  | 6.872202535  | 7.589930018  | 1.92E-12 |
| DUSP19   | -2.143661352 | 2.133223498  | -7.566774485 | 2.19E-12 |
| RNASEH2A | 1.73396975   | 4.339233148  | 7.551011496  | 2.40E-12 |
| LAMP3    | 3.151628148  | 4.591098186  | 7.531975024  | 2.68E-12 |
| TYMS     | 1.862048861  | 4.951026458  | 7.524046912  | 2.81E-12 |
| BRCA1    | 1.7712884    | 5.1215684    | 7.498481129  | 3.25E-12 |
| RACGAP1  | 1.542260793  | 5.82315398   | 7.495764228  | 3.30E-12 |
| GKN1     | -8.020867939 | -1.986610618 | -7.49204704  | 3.38E-12 |
| ESPL1    | 2.295519295  | 5.34543584   | 7.480466643  | 3.61E-12 |
| OIP5     | 2.020083304  | 2.01074492   | 7.470142838  | 3.83E-12 |
| HDC      | -3.750875736 | -0.363355031 | -7.420059493 | 5.10E-12 |
| MND1     | 2.034946205  | 1.75493364   | 7.411453516  | 5.36E-12 |
| B3GAT1   | -4.306828199 | -0.53918526  | -7.396348501 | 5.84E-12 |
| CDCA7    | 2.44779405   | 5.320144571  | 7.394641057  | 5.90E-12 |
| IBSP     | 3.891937779  | -0.366165737 | 7.388909368  | 6.10E-12 |
| SLC25A4  | -1.976033955 | 4.25814728   | -7.357790338 | 7.28E-12 |
| GIN54    | 2.133371836  | 3.044445053  | 7.352521711  | 7.50E-12 |
| TTK      | 1.799695353  | 4.552329049  | 7.342922703  | 7.92E-12 |
| NUDT1    | 1.816035707  | 3.652530587  | 7.338339603  | 8.13E-12 |
| ACAT1    | -1.565927584 | 4.755207369  | -7.334823351 | 8.30E-12 |
| SPC25    | 1.631128432  | 2.867509305  | 7.331450741  | 8.46E-12 |
| ESM1     | 3.583255288  | 1.923062933  | 7.313764802  | 9.35E-12 |
| DDX39A   | 1.251870403  | 6.152321183  | 7.291312094  | 1.06E-11 |

|           |              |              |              |          |
|-----------|--------------|--------------|--------------|----------|
| MT1M      | -4.171282558 | 0.383778393  | -7.286747199 | 1.09E-11 |
| GIN52     | 2.206557501  | 3.585367042  | 7.283885497  | 1.11E-11 |
| SPAG5     | 2.076020573  | 5.379422088  | 7.280811015  | 1.13E-11 |
| ALDH6A1   | -1.910518147 | 4.736583932  | -7.263592221 | 1.24E-11 |
| NRM       | 1.695910031  | 4.604795123  | 7.239870096  | 1.42E-11 |
| TACC3     | 1.713560346  | 5.840675883  | 7.23904577   | 1.43E-11 |
| TBC1D14   | -1.568408201 | 4.830546356  | -7.223670274 | 1.56E-11 |
| FAM111B   | 2.107854538  | 4.049256497  | 7.221409645  | 1.58E-11 |
| LRP8      | 2.473442535  | 4.753366     | 7.213933164  | 1.65E-11 |
| PIF1      | 1.799406857  | 2.847971788  | 7.206313705  | 1.72E-11 |
| RBL1      | 1.430618912  | 4.673167205  | 7.204985644  | 1.73E-11 |
| TMEM161B  | -1.299891457 | 4.039570747  | -7.204627204 | 1.73E-11 |
| RAB11FIP2 | -1.474743181 | 4.548062752  | -7.201577975 | 1.76E-11 |
| ESRRG     | -4.932711227 | -0.374675456 | -7.184587595 | 1.94E-11 |
| E2F1      | 1.559674712  | 4.381896188  | 7.1832804    | 1.96E-11 |
| MMP12     | 4.243223361  | 4.147512617  | 7.178451468  | 2.01E-11 |
| H2BC9     | 2.625345179  | 0.344659661  | 7.170521402  | 2.10E-11 |
| SNRPG     | 1.167068943  | 5.414102532  | 7.156678423  | 2.27E-11 |
| CYRIB     | 1.264689987  | 6.235857521  | 7.156631992  | 2.27E-11 |
| TRAIP     | 1.551632577  | 2.345799891  | 7.138592225  | 2.52E-11 |
| CHEK2     | 1.411012897  | 3.417849754  | 7.129873781  | 2.64E-11 |
| BRCA2     | 1.786690728  | 4.471895745  | 7.125664629  | 2.70E-11 |
| KLF15     | -4.076631601 | 0.564898367  | -7.125118755 | 2.71E-11 |
| CADM2     | -4.734280598 | -1.675690842 | -7.103408912 | 3.06E-11 |
| F12       | 2.741017673  | 3.119312351  | 7.093586363  | 3.24E-11 |
| RFC3      | 1.614236455  | 4.683583081  | 7.089549005  | 3.31E-11 |
| FEN1      | 1.580425749  | 5.14306008   | 7.088513024  | 3.33E-11 |
| ANGPTL3   | -2.92807123  | -1.135338988 | -7.079041971 | 3.51E-11 |
| RCC2      | 1.355546759  | 7.784349409  | 7.054292387  | 4.03E-11 |
| MTFR1L    | -1.032990845 | 4.703510123  | -7.033639954 | 4.52E-11 |
| PLIN5     | -3.532015106 | -0.196655827 | -7.03050067  | 4.60E-11 |
| MMP11     | 4.316987259  | 5.417845183  | 7.026173295  | 4.72E-11 |
| MYRIP     | -4.204431578 | 0.283886046  | -7.014435258 | 5.03E-11 |
| PBXIP1    | -1.498282855 | 6.122605717  | -6.999763739 | 5.46E-11 |
| SYNJ2BP   | -1.313436866 | 5.476476019  | -6.995518854 | 5.59E-11 |
| PRIM2     | 1.237467948  | 3.982545786  | 6.991764106  | 5.71E-11 |
| SEC14L5   | -2.712778434 | -0.234584264 | -6.986416582 | 5.88E-11 |
| HMGB3     | 1.924366508  | 5.516367861  | 6.985212691  | 5.92E-11 |
| CIRBP     | -1.131160137 | 6.309917099  | -6.981217433 | 6.06E-11 |
| RELT      | 1.652726706  | 3.254179316  | 6.977290856  | 6.19E-11 |
| CXCL8     | 4.096523808  | 5.022109172  | 6.963283969  | 6.69E-11 |
| RCC1      | 1.482361936  | 5.445659091  | 6.946819309  | 7.33E-11 |
| ARHGDIG   | -4.194551804 | -1.755956961 | -6.933464055 | 7.89E-11 |
| FRMD1     | -5.311264852 | -1.594712017 | -6.907390304 | 9.11E-11 |
| CTIF      | -1.671005361 | 4.887666356  | -6.899470508 | 9.52E-11 |
| MRGBP     | 1.20083865   | 4.338474287  | 6.896706423  | 9.66E-11 |
| CDK2      | 1.184543189  | 4.921225703  | 6.884932872  | 1.03E-10 |
| ALYREF    | 1.185073176  | 5.383385968  | 6.873158663  | 1.10E-10 |
| STMN1     | 1.799495598  | 6.90101948   | 6.854544137  | 1.22E-10 |
| CLDN7     | 3.23999702   | 6.104135177  | 6.849071984  | 1.26E-10 |
| CBFB      | 1.139435503  | 5.927494951  | 6.84161683   | 1.31E-10 |
| CDCA4     | 1.840230433  | 4.857163365  | 6.838820331  | 1.33E-10 |
| AUNIP     | 1.773568957  | 1.938114138  | 6.826077511  | 1.43E-10 |

|           |              |              |              |          |
|-----------|--------------|--------------|--------------|----------|
| SNRPB     | 1.247149252  | 7.650147135  | 6.787080089  | 1.76E-10 |
| CKB       | -3.164945314 | 5.422729552  | -6.773844558 | 1.90E-10 |
| RMI2      | 1.944075939  | 3.855987506  | 6.760350826  | 2.04E-10 |
| CNTD1     | -1.925315677 | 0.783283998  | -6.75814643  | 2.07E-10 |
| POLE2     | 1.412716744  | 3.156609699  | 6.757674904  | 2.07E-10 |
| ZWINT     | 1.619627897  | 5.07291958   | 6.752427073  | 2.13E-10 |
| ADAMTS12  | 3.256858523  | 4.021586527  | 6.748817208  | 2.17E-10 |
| CUX2      | -3.990913262 | -1.910953365 | -6.742140495 | 2.25E-10 |
| CAB39L    | -2.148278061 | 3.253896748  | -6.738912707 | 2.29E-10 |
| SMIM14    | -1.493014262 | 5.589083237  | -6.737685071 | 2.31E-10 |
| CTXND1    | -4.099302947 | -1.727799955 | -6.73076087  | 2.40E-10 |
| SECISBP2L | -1.236203477 | 5.518906542  | -6.726667785 | 2.45E-10 |
| GKN2      | -6.195246642 | -2.516298487 | -6.726628326 | 2.45E-10 |
| DGKD      | -2.181342206 | 5.458054277  | -6.723990687 | 2.49E-10 |
| SPDL1     | 1.276381923  | 4.131928711  | 6.713504592  | 2.63E-10 |
| NME1      | 1.487576149  | 5.448029224  | 6.701698569  | 2.81E-10 |
| TRIM59    | 1.623182158  | 3.870558363  | 6.700493289  | 2.83E-10 |
| SLC9A4    | -5.620573161 | 0.02408022   | -6.697850765 | 2.87E-10 |
| SUCLG2    | -1.64917799  | 5.420049375  | -6.695008351 | 2.91E-10 |
| PRKN      | -2.667725283 | 0.402773049  | -6.690167791 | 2.99E-10 |
| DSCC1     | 1.581573574  | 3.428360407  | 6.68447938   | 3.08E-10 |
| MCM7      | 1.700705104  | 7.012622872  | 6.681730212  | 3.13E-10 |
| LMNB2     | 1.490794958  | 7.029903001  | 6.677737831  | 3.20E-10 |
| SNX10     | 2.232272898  | 4.263966056  | 6.676646629  | 3.22E-10 |
| ASPA      | -3.360282908 | -0.788659768 | -6.67540168  | 3.24E-10 |
| CENPU     | 1.767269718  | 4.240957911  | 6.669319076  | 3.35E-10 |
| JPT1      | 1.529376677  | 6.686794883  | 6.668474061  | 3.36E-10 |
| PLAU      | 2.895794011  | 6.297628821  | 6.667020522  | 3.39E-10 |
| PDIA2     | -5.314900269 | -0.314989662 | -6.661584028 | 3.49E-10 |
| MFSD4A    | -4.441512919 | 2.851261611  | -6.658371151 | 3.55E-10 |
| LY6E      | 2.18608746   | 7.882097079  | 6.647028938  | 3.78E-10 |
| PCSK9     | 3.63319293   | 4.095157867  | 6.646427109  | 3.79E-10 |
| PDCD4     | -1.638627582 | 5.978547518  | -6.641768737 | 3.89E-10 |
| UBL3      | -1.744895186 | 5.839306974  | -6.631001772 | 4.12E-10 |
| ERFE      | 2.532551244  | 1.263992427  | 6.628267416  | 4.18E-10 |
| HELLS     | 1.482666948  | 5.288792773  | 6.627923721  | 4.19E-10 |
| ESCO2     | 1.909905827  | 3.728071018  | 6.626758224  | 4.21E-10 |
| RFC4      | 1.670717921  | 4.462562793  | 6.621733204  | 4.33E-10 |
| CDC7      | 1.492318755  | 3.493955562  | 6.620207739  | 4.37E-10 |
| DNMT1     | 1.170058395  | 6.810564766  | 6.618311443  | 4.41E-10 |
| HDGF      | 1.043003532  | 8.516311586  | 6.605502652  | 4.73E-10 |
| KCNJ13    | -2.44929487  | -0.743340512 | -6.598747338 | 4.90E-10 |
| ACACB     | -2.435676799 | 4.178118912  | -6.595150658 | 5.00E-10 |
| HOXA10    | 3.193291401  | 2.913205716  | 6.591994459  | 5.08E-10 |
| CENPL     | 1.119731809  | 3.551416505  | 6.580547205  | 5.41E-10 |
| FOXS1     | 2.287200372  | 0.380596807  | 6.578658973  | 5.46E-10 |
| TEAD4     | 1.456763263  | 4.443797841  | 6.547557107  | 6.45E-10 |
| HOXC10    | 4.074939868  | 2.882243042  | 6.543945911  | 6.58E-10 |
| ZHX3      | -1.241494184 | 5.210922205  | -6.543332072 | 6.60E-10 |
| JADE1     | -1.82224538  | 4.822075588  | -6.541025984 | 6.68E-10 |
| IGF2BP3   | 4.482387118  | 3.374357016  | 6.537428916  | 6.81E-10 |
| PRR7      | 2.025606941  | 3.640410762  | 6.528016307  | 7.17E-10 |
| POLD1     | 1.258904689  | 5.089004181  | 6.525276523  | 7.27E-10 |

|          |              |              |              |          |
|----------|--------------|--------------|--------------|----------|
| C6       | -4.440720673 | -2.139299073 | -6.519464776 | 7.50E-10 |
| RIMS4    | -4.058260786 | -1.987703717 | -6.514516976 | 7.70E-10 |
| AK3      | -1.130889039 | 6.259728009  | -6.495929893 | 8.51E-10 |
| RUVBL1   | 1.365526756  | 5.47923372   | 6.493117606  | 8.63E-10 |
| TUBB     | 1.193816263  | 9.4431709    | 6.490928656  | 8.74E-10 |
| DNA2     | 1.441677538  | 3.60931035   | 6.45486205   | 1.06E-09 |
| FAM107A  | -3.559363216 | 1.471013594  | -6.443387414 | 1.13E-09 |
| GPRIN1   | 2.155994322  | 4.019315108  | 6.441381079  | 1.14E-09 |
| FBXO5    | 1.181782067  | 3.707944186  | 6.441120092  | 1.14E-09 |
| SCUBE2   | -3.083439649 | 1.425195125  | -6.43309561  | 1.19E-09 |
| DNER     | -4.507338637 | -0.360812145 | -6.432313266 | 1.19E-09 |
| ACO2     | -1.105676359 | 6.56011211   | -6.424958483 | 1.24E-09 |
| CBX3     | 1.117654091  | 7.21649857   | 6.421104733  | 1.27E-09 |
| P2RY14   | -2.826979888 | 0.734351129  | -6.418771308 | 1.28E-09 |
| POC1A    | 1.523197543  | 3.087764867  | 6.414337412  | 1.31E-09 |
| BTD      | -1.516473605 | 3.464171032  | -6.399790962 | 1.42E-09 |
| CENPN    | 1.276024112  | 4.302317822  | 6.397553378  | 1.43E-09 |
| CHAF1A   | 1.188745686  | 4.819647523  | 6.390434178  | 1.49E-09 |
| GABRD    | 2.49952338   | 0.04462      | 6.388190774  | 1.51E-09 |
| MDFI     | 2.4118148    | 4.874015048  | 6.380173647  | 1.57E-09 |
| MT1G     | -4.184912752 | 3.223877515  | -6.37652383  | 1.60E-09 |
| LIG1     | 1.201529872  | 5.13299847   | 6.37007939   | 1.66E-09 |
| ANP32E   | 1.122256011  | 6.13648082   | 6.369041897  | 1.67E-09 |
| SST      | -5.075206998 | -2.766101596 | -6.357389532 | 1.77E-09 |
| ACADSB   | -1.625956457 | 4.406282583  | -6.354193155 | 1.80E-09 |
| FOXN3    | -1.242019588 | 6.445937476  | -6.346836358 | 1.87E-09 |
| MT-ND6   | -1.985939699 | 9.044135934  | -6.344546851 | 1.90E-09 |
| TMEM26   | 2.274441631  | 0.424783223  | 6.338913674  | 1.95E-09 |
| E2F2     | 1.84797326   | 3.876528391  | 6.338459196  | 1.96E-09 |
| ZWILCH   | 1.229817113  | 4.904104535  | 6.337394896  | 1.97E-09 |
| ATOH8    | -2.888408955 | 0.679619363  | -6.327232495 | 2.08E-09 |
| ARHGEF37 | -2.036947894 | 4.342162212  | -6.315530204 | 2.21E-09 |
| DKC1     | 1.050629312  | 6.427367048  | 6.314410091  | 2.22E-09 |
| DBT      | -1.234049515 | 5.060181363  | -6.304637373 | 2.34E-09 |
| MMS22L   | 1.199996275  | 4.610822337  | 6.286475646  | 2.57E-09 |
| ZBTB16   | -4.409311811 | 0.722812742  | -6.276504399 | 2.71E-09 |
| EIF4A3   | 1.026081384  | 6.472207178  | 6.27494049   | 2.73E-09 |
| PNPLA7   | -2.583104969 | 2.377987344  | -6.274920733 | 2.73E-09 |
| TTYH3    | 1.737951164  | 7.764588422  | 6.27295673   | 2.76E-09 |
| CD3EAP   | 1.290804065  | 2.4072264    | 6.272589688  | 2.77E-09 |
| RAB27A   | -1.409679663 | 4.937064273  | -6.270685523 | 2.80E-09 |
| DGLUCY   | -1.240948995 | 4.906281041  | -6.269849811 | 2.81E-09 |
| ETV4     | 2.689975216  | 5.146990548  | 6.265257713  | 2.88E-09 |
| DPT      | -3.663892956 | 1.376356802  | -6.264834217 | 2.88E-09 |
| CTHRC1   | 2.9077801    | 4.542429158  | 6.263617789  | 2.90E-09 |
| BAX      | 1.068950505  | 4.953439092  | 6.260257291  | 2.95E-09 |
| LIFR     | -3.221037619 | 3.905884369  | -6.256632127 | 3.01E-09 |
| FANCD2   | 1.512906485  | 4.437955238  | 6.255011137  | 3.03E-09 |
| C3orf18  | -1.992082353 | 0.90130958   | -6.247025336 | 3.16E-09 |
| KL       | -2.820232242 | 0.293551012  | -6.246603347 | 3.17E-09 |
| LEPR     | -2.540866882 | 3.569982255  | -6.240727463 | 3.27E-09 |
| CLEC5A   | 2.658986897  | 0.979484966  | 6.233700959  | 3.39E-09 |
| PXMP2    | -1.538445579 | 2.958226197  | -6.231851921 | 3.42E-09 |

|          |              |              |              |          |
|----------|--------------|--------------|--------------|----------|
| FAAP24   | 1.335233011  | 2.09450097   | 6.229301273  | 3.47E-09 |
| MYOC     | -5.292150838 | -1.872251307 | -6.217018776 | 3.70E-09 |
| SLC26A7  | -3.717328187 | -1.355668579 | -6.212039447 | 3.80E-09 |
| ACTL6A   | 1.274658286  | 6.111206191  | 6.210490463  | 3.83E-09 |
| FGD6     | 1.549825787  | 5.720885621  | 6.206405832  | 3.91E-09 |
| SAPCD2   | 1.987261946  | 5.307543418  | 6.196048522  | 4.12E-09 |
| GNG7     | -2.696855185 | 1.46140894   | -6.191325453 | 4.23E-09 |
| NCAPG2   | 1.536238109  | 5.175956034  | 6.190398997  | 4.25E-09 |
| ECI2     | -1.522997657 | 4.375473497  | -6.186664514 | 4.33E-09 |
| GRIP2    | -2.919158719 | 0.495786743  | -6.183807034 | 4.40E-09 |
| TCF19    | 1.324511167  | 4.874485329  | 6.182851257  | 4.42E-09 |
| SLC16A13 | 1.618279581  | 2.719612905  | 6.177978109  | 4.53E-09 |
| MICB     | 2.403684998  | 2.884626902  | 6.174713971  | 4.61E-09 |
| C5orf34  | 1.643772437  | 2.011820479  | 6.153106352  | 5.15E-09 |
| PBLD     | -2.374509675 | 3.032585296  | -6.150737478 | 5.22E-09 |
| CHTF18   | 1.366985421  | 4.366809024  | 6.150672082  | 5.22E-09 |
| GSTM5    | -2.503540634 | 0.02671534   | -6.147210033 | 5.31E-09 |
| CPEB3    | -1.501176237 | 3.225284809  | -6.145864933 | 5.35E-09 |
| CHAF1B   | 1.491416726  | 3.741258977  | 6.14374302   | 5.41E-09 |
| MT-ND5   | -1.786081334 | 11.10755086  | -6.135502535 | 5.64E-09 |
| NICN1    | -1.145908502 | 2.773307233  | -6.134129174 | 5.68E-09 |
| TMC6     | 1.280323287  | 5.865746934  | 6.134066034  | 5.69E-09 |
| PFDN2    | 1.194700933  | 5.018651664  | 6.131953862  | 5.75E-09 |
| FYCO1    | -1.355168414 | 5.813002623  | -6.117666495 | 6.19E-09 |
| LRFN4    | 1.713443565  | 4.935405325  | 6.107441464  | 6.52E-09 |
| CARNS1   | -2.406222582 | 1.019145894  | -6.107325074 | 6.53E-09 |
| KIF20B   | 1.389211313  | 5.16679304   | 6.103529925  | 6.65E-09 |
| MCM6     | 1.213493253  | 5.848002539  | 6.096986307  | 6.88E-09 |
| FGD4     | -2.055034066 | 5.252985043  | -6.095766534 | 6.93E-09 |
| MTHFD1L  | 1.377074717  | 5.048773922  | 6.094137078  | 6.98E-09 |
| SGSM3    | -1.064886017 | 5.65672186   | -6.093129442 | 7.02E-09 |
| DSN1     | 1.128201729  | 4.450057735  | 6.090424798  | 7.12E-09 |
| CBX7     | -1.70906917  | 4.024866063  | -6.09022061  | 7.13E-09 |
| BCL2L12  | 1.241657014  | 3.858950354  | 6.085299866  | 7.31E-09 |
| MMP3     | 4.242257917  | 3.666650734  | 6.068965857  | 7.95E-09 |
| AUH      | -1.035252024 | 3.335083227  | -6.066214217 | 8.06E-09 |
| DBF4     | 1.404369777  | 4.594125005  | 6.061805102  | 8.25E-09 |
| BRIX1    | 1.216996251  | 5.142522604  | 6.048123417  | 8.84E-09 |
| AFF3     | -3.301413084 | 0.844420321  | -6.044907429 | 8.99E-09 |
| E2F3     | 1.042330982  | 4.662415174  | 6.035553203  | 9.43E-09 |
| ETFDH    | -1.392446372 | 4.401532222  | -6.035152605 | 9.45E-09 |
| CHGA     | -5.589452804 | -0.669578367 | -6.032204094 | 9.59E-09 |
| PLIN4    | -3.346277107 | 1.939493844  | -6.027065475 | 9.85E-09 |
| IL11     | 2.771619688  | 1.041833004  | 6.017320204  | 1.04E-08 |
| ADAM12   | 3.244792318  | 3.990845865  | 6.017235248  | 1.04E-08 |
| MT1A     | -3.666898103 | -0.981559291 | -6.008010507 | 1.09E-08 |
| TNFRSF25 | 1.623558596  | 4.037347583  | 6.004746893  | 1.10E-08 |
| FNDC5    | -2.860371823 | -0.103597854 | -6.004331327 | 1.11E-08 |
| OTX1     | 2.153009754  | 3.030258556  | 6.003371152  | 1.11E-08 |
| MINDY1   | -1.641568376 | 4.440588924  | -6.002761851 | 1.11E-08 |
| APOBEC2  | -2.746165573 | -1.007343921 | -5.999664634 | 1.13E-08 |
| ASAH2    | -2.441538871 | 0.336520509  | -5.999598711 | 1.13E-08 |
| RFWD3    | 1.028253283  | 5.968464577  | 5.997996736  | 1.14E-08 |



|          |              |              |              |          |
|----------|--------------|--------------|--------------|----------|
| NDC1     | 1.082129739  | 5.828840077  | 5.976921741  | 1.27E-08 |
| ABCC8    | -3.962122971 | -1.980180419 | -5.976297845 | 1.28E-08 |
| MASTL    | 1.102542901  | 4.47405886   | 5.973454713  | 1.29E-08 |
| ZNF367   | 1.492913169  | 3.980170053  | 5.967892044  | 1.33E-08 |
| BLACAT1  | 3.245336366  | 1.922738824  | 5.966796355  | 1.34E-08 |
| CHAD     | -2.953066192 | -0.019976881 | -5.964024552 | 1.36E-08 |
| PSCA     | -5.781590596 | 3.17740284   | -5.956960353 | 1.41E-08 |
| ASXL3    | -2.961341237 | -1.119927701 | -5.949110607 | 1.46E-08 |
| USP53    | -1.355412918 | 5.665731602  | -5.937718439 | 1.55E-08 |
| GEN1     | 1.064130347  | 4.835886004  | 5.937345448  | 1.55E-08 |
| CENPH    | 1.511467096  | 3.128423413  | 5.935614479  | 1.57E-08 |
| PRX      | -1.411579631 | 1.801291963  | -5.934373498 | 1.58E-08 |
| ISG15    | 2.561917578  | 5.574955745  | 5.927257854  | 1.64E-08 |
| GCNT4    | -2.691521761 | 1.864466443  | -5.924224296 | 1.66E-08 |
| CDH24    | 1.637758997  | 3.923174063  | 5.917898176  | 1.71E-08 |
| CLDN4    | 3.082512865  | 7.437619956  | 5.916191835  | 1.73E-08 |
| ECRG4    | -4.127448379 | -1.318112751 | -5.899509383 | 1.88E-08 |
| NOX4     | 2.400289176  | 1.116980247  | 5.894820053  | 1.93E-08 |
| ALKAL2   | -2.708370306 | -1.142939483 | -5.885059263 | 2.02E-08 |
| PLA2G7   | 2.416346817  | 2.407284507  | 5.880203052  | 2.07E-08 |
| SH3BP1   | 1.923603369  | 6.062604078  | 5.876637524  | 2.11E-08 |
| ATAD2    | 1.29510954   | 6.329341787  | 5.866425269  | 2.22E-08 |
| H2BC8    | 2.565580519  | 0.954125406  | 5.855658773  | 2.35E-08 |
| PRIM1    | 1.284815655  | 3.134007962  | 5.853515818  | 2.37E-08 |
| PACC1    | 1.178937155  | 3.158420235  | 5.846737998  | 2.45E-08 |
| DTYMK    | 1.150772297  | 4.601629131  | 5.841012517  | 2.52E-08 |
| NCAM1    | -3.617667255 | 1.169330991  | -5.838292463 | 2.56E-08 |
| MFAP2    | 2.832122638  | 3.703293766  | 5.838043219  | 2.56E-08 |
| BDH2     | -1.265066608 | 3.372026762  | -5.833647313 | 2.62E-08 |
| CXCL1    | 3.688691563  | 4.88916258   | 5.833562878  | 2.62E-08 |
| CDH3     | 3.276668817  | 6.869137145  | 5.827646957  | 2.70E-08 |
| ARHGEF28 | -1.549075093 | 4.841163116  | -5.826624952 | 2.71E-08 |
| DBF4B    | 1.209696394  | 3.864844406  | 5.824711975  | 2.74E-08 |
| DCLRE1B  | 1.061916014  | 3.618654012  | 5.821380843  | 2.79E-08 |
| ADGRG2   | -2.433812271 | 0.431321517  | -5.816292496 | 2.86E-08 |
| DLX4     | 2.542145871  | 0.871025377  | 5.81615508   | 2.86E-08 |
| GREM2    | -4.126089667 | 0.308757952  | -5.807835077 | 2.98E-08 |
| CMTM4    | -1.786192033 | 5.850400172  | -5.799997968 | 3.10E-08 |
| XYLT2    | -1.349491983 | 5.442651128  | -5.795206829 | 3.17E-08 |
| HRH2     | -2.696838725 | 0.1586014    | -5.784539336 | 3.35E-08 |
| BORA     | 1.232409025  | 3.124618751  | 5.756073497  | 3.86E-08 |
| FZD2     | 2.292512159  | 2.655787952  | 5.752555085  | 3.92E-08 |
| MIS18A   | 1.225443607  | 3.329954801  | 5.751601524  | 3.94E-08 |
| CLEC3B   | -2.650901539 | 0.378859552  | -5.75097611  | 3.96E-08 |
| BCKDHB   | -1.40080085  | 4.027772399  | -5.741996707 | 4.14E-08 |
| MELTF    | 2.506160383  | 5.162158299  | 5.739184803  | 4.19E-08 |
| MCM8     | 1.210127521  | 4.950380268  | 5.73609287   | 4.26E-08 |
| CCT5     | 1.20011177   | 7.721235154  | 5.733580497  | 4.31E-08 |
| LRIG1    | -1.93366285  | 6.030203667  | -5.728697841 | 4.42E-08 |
| SERPINH1 | 1.721911657  | 7.494270186  | 5.724854101  | 4.50E-08 |
| H2AX     | 1.382878557  | 6.155616188  | 5.72281195   | 4.55E-08 |
| OLFML2B  | 2.450792777  | 3.92617289   | 5.717104995  | 4.68E-08 |
| PTGDR2   | -2.329624458 | -0.562812015 | -5.717075642 | 4.68E-08 |

|          |              |              |              |          |
|----------|--------------|--------------|--------------|----------|
| METTL7A  | -2.521660376 | 4.961493177  | -5.708360682 | 4.88E-08 |
| ACADS    | -1.392537111 | 4.135414302  | -5.703664059 | 5.00E-08 |
| TMEM220  | -1.972566713 | 1.868193712  | -5.692769136 | 5.28E-08 |
| PTPN21   | -1.187684241 | 4.604308956  | -5.687304812 | 5.42E-08 |
| ULBP1    | 2.859223229  | 0.560536236  | 5.680573116  | 5.60E-08 |
| TONSL    | 1.360113396  | 5.463436229  | 5.679869272  | 5.62E-08 |
| GLUL     | -1.995544394 | 8.656226248  | -5.669134955 | 5.93E-08 |
| SASS6    | 1.121110409  | 3.601827843  | 5.666381234  | 6.01E-08 |
| ADGRD1   | -3.414829462 | 1.397277887  | -5.663067001 | 6.11E-08 |
| RANBP1   | 1.169733448  | 6.596103549  | 5.662782108  | 6.11E-08 |
| ANGPT2   | 1.721555077  | 3.726354704  | 5.661162037  | 6.16E-08 |
| FAM72C   | 2.037926644  | -0.419953197 | 5.657375832  | 6.28E-08 |
| IGIP     | -1.29105571  | 3.088854312  | -5.656763015 | 6.30E-08 |
| PSRC1    | 1.534303767  | 2.872763437  | 5.650553848  | 6.49E-08 |
| FAM110A  | 1.390419279  | 4.546401319  | 5.649868532  | 6.51E-08 |
| ILDR1    | 2.45859393   | 2.971295137  | 5.649750677  | 6.52E-08 |
| TFRC     | 1.80016033   | 8.173982985  | 5.646037405  | 6.64E-08 |
| GPT2     | -2.006884903 | 5.47547098   | -5.64550661  | 6.66E-08 |
| PRKAB1   | -1.076966841 | 5.323681468  | -5.642133417 | 6.77E-08 |
| NUP107   | 1.12662903   | 5.479307215  | 5.635489323  | 6.99E-08 |
| SALL4    | 3.188724189  | 1.606770172  | 5.635115175  | 7.00E-08 |
| SERPINB5 | 3.79192612   | 7.092987495  | 5.634911305  | 7.01E-08 |
| H2BC11   | 2.400805594  | 1.574858924  | 5.62921644   | 7.21E-08 |
| ALG3     | 1.169603055  | 6.546784417  | 5.625894344  | 7.33E-08 |
| COLGALT1 | 1.078296073  | 6.942275403  | 5.61350957   | 7.78E-08 |
| PLP1     | -3.968872204 | -1.408174058 | -5.610151986 | 7.91E-08 |
| HS6ST3   | -3.784576848 | -1.628146293 | -5.604985505 | 8.12E-08 |
| PPIA     | 1.005961318  | 9.205571723  | 5.604162721  | 8.15E-08 |
| SDS      | 2.586253076  | 2.138023883  | 5.60202289   | 8.23E-08 |
| COL7A1   | 3.204757651  | 6.721219509  | 5.597632678  | 8.41E-08 |
| PCCA     | -1.45644614  | 3.608690623  | -5.594896042 | 8.52E-08 |
| PGC      | -9.356290607 | 2.106732903  | -5.58508958  | 8.94E-08 |
| DNMT3B   | 2.016560525  | 3.368924347  | 5.582532684  | 9.05E-08 |
| MYO18B   | -3.612852128 | -0.960723497 | -5.580685445 | 9.14E-08 |
| INHBA    | 3.068569689  | 5.318750849  | 5.57234811   | 9.51E-08 |
| SORCS1   | -3.475454985 | -1.730863804 | -5.571373642 | 9.56E-08 |
| GPD1L    | -1.62209397  | 4.959861441  | -5.569646787 | 9.64E-08 |
| TUBA1B   | 1.089481973  | 8.057399493  | 5.568824227  | 9.68E-08 |
| MAGI1    | -1.834770197 | 5.336152919  | -5.565817664 | 9.82E-08 |
| SKP2     | 1.427539905  | 5.209293282  | 5.565203612  | 9.85E-08 |
| CFD      | -2.717242016 | 3.478149781  | -5.563220344 | 9.95E-08 |
| ARPC1B   | 1.466926552  | 7.348800832  | 5.553971569  | 1.04E-07 |
| SLC16A7  | -2.918056482 | 3.441696174  | -5.546724136 | 1.08E-07 |
| SINHCAF  | 1.083162276  | 6.298562508  | 5.543029483  | 1.10E-07 |
| FAP      | 2.886492732  | 2.955879514  | 5.536804113  | 1.13E-07 |
| UCN2     | 3.179620241  | 0.310718401  | 5.535672184  | 1.14E-07 |
| MEST     | 1.90427563   | 5.367337814  | 5.53404027   | 1.15E-07 |
| NEXMIF   | -3.667857696 | -1.36267952  | -5.533781122 | 1.15E-07 |
| FIGNL1   | 1.17883335   | 4.430505161  | 5.528005794  | 1.18E-07 |
| MCM5     | 1.349433064  | 6.341520407  | 5.52203197   | 1.21E-07 |
| CENPQ    | 1.165521596  | 2.844203691  | 5.521591871  | 1.22E-07 |
| SESN1    | -1.401526495 | 4.374119072  | -5.518731671 | 1.23E-07 |
| DDX11    | 1.085622239  | 5.191230137  | 5.518424447  | 1.24E-07 |

|          |              |              |              |          |
|----------|--------------|--------------|--------------|----------|
| VSIG2    | -5.134986817 | 2.001291317  | -5.516719006 | 1.25E-07 |
| FOXP3    | 1.997364979  | 2.032745838  | 5.51398053   | 1.26E-07 |
| PMAIP1   | 1.873851427  | 3.921725567  | 5.512825814  | 1.27E-07 |
| IGFALS   | -3.376999937 | -0.68595938  | -5.503480515 | 1.33E-07 |
| PYCARD   | 1.522179574  | 4.737907014  | 5.502315785  | 1.34E-07 |
| PAICS    | 1.11726242   | 7.088577601  | 5.494265304  | 1.39E-07 |
| FAM189A2 | -3.430438683 | 1.151686626  | -5.490025383 | 1.42E-07 |
| ACOT7    | 1.3032254    | 5.638997497  | 5.487053306  | 1.44E-07 |
| SCG3     | -3.488015269 | -2.36961093  | -5.48563828  | 1.45E-07 |
| AAMDC    | -1.088308124 | 2.380948524  | -5.476145134 | 1.52E-07 |
| CGNL1    | -2.82961839  | 3.08789889   | -5.475081855 | 1.52E-07 |
| ARHGAP24 | -1.794457585 | 3.189361521  | -5.474155968 | 1.53E-07 |
| ACER2    | -2.315796369 | 2.449773025  | -5.473412527 | 1.54E-07 |
| RTKN     | 1.065705509  | 5.736246811  | 5.472039273  | 1.55E-07 |
| PLAUR    | 1.829310272  | 5.54780149   | 5.45896946   | 1.65E-07 |
| RPA3     | 1.094657647  | 4.670713733  | 5.453368916  | 1.69E-07 |
| VIP      | -2.895298972 | -2.119071587 | -5.451201249 | 1.71E-07 |
| H2AC8    | 2.266040629  | 0.779184819  | 5.446754003  | 1.74E-07 |
| SULT2A1  | -3.749201869 | -2.983638514 | -5.444903686 | 1.76E-07 |
| HMGA1    | 1.515973063  | 8.720574431  | 5.4403169    | 1.80E-07 |
| BOP1     | 1.301545299  | 6.255347133  | 5.43605556   | 1.84E-07 |
| MSH2     | 1.002882955  | 5.103816092  | 5.434539952  | 1.85E-07 |
| ADH1B    | -4.907548608 | 0.398149118  | -5.430837932 | 1.88E-07 |
| NUP37    | 1.004692589  | 4.298043536  | 5.428554801  | 1.90E-07 |
| TSPYL4   | -1.158551684 | 4.712752959  | -5.423950596 | 1.95E-07 |
| PUS7     | 1.240649602  | 5.011428059  | 5.414612725  | 2.03E-07 |
| SORBS1   | -2.73291864  | 5.278927465  | -5.411941763 | 2.06E-07 |
| SLC18A2  | -1.942321455 | -0.08141639  | -5.411026647 | 2.07E-07 |
| TCOF1    | 1.013653016  | 6.534113728  | 5.403660818  | 2.14E-07 |
| CFAP46   | -3.526842381 | -0.706275832 | -5.395423788 | 2.23E-07 |
| SCARA5   | -4.112880196 | 0.405810697  | -5.395083733 | 2.23E-07 |
| PTCHD1   | -2.909944169 | -0.555155254 | -5.393108154 | 2.25E-07 |
| CENPJ    | 1.186275368  | 3.873227231  | 5.38736262   | 2.32E-07 |
| FBXL13   | -2.053913108 | 0.30448359   | -5.386073033 | 2.33E-07 |
| PKNOX2   | -2.313027847 | -0.183935185 | -5.385214651 | 2.34E-07 |
| CLN8     | -1.058442202 | 4.10468839   | -5.374581212 | 2.46E-07 |
| RGN      | -3.106312991 | -0.187555557 | -5.373453677 | 2.48E-07 |
| ATAD5    | 1.113015661  | 4.249724815  | 5.371811244  | 2.50E-07 |
| RHEBL1   | 1.397320561  | 0.04015524   | 5.370428277  | 2.51E-07 |
| CCNE1    | 1.955234038  | 3.412527108  | 5.363556086  | 2.59E-07 |
| HOXA1    | 2.031011156  | 2.036327062  | 5.358329895  | 2.66E-07 |
| PINK1    | -1.122891933 | 4.384672248  | -5.357436882 | 2.67E-07 |
| PDK4     | -3.804873459 | 4.065155835  | -5.356603342 | 2.68E-07 |
| FXYD4    | -3.471731027 | -2.13595274  | -5.354467485 | 2.71E-07 |
| BGN      | 2.326293904  | 8.10804405   | 5.354155987  | 2.71E-07 |
| ZNF778   | -1.019169355 | 3.487246505  | -5.348359168 | 2.79E-07 |
| PSMB3    | 1.054519138  | 6.84456649   | 5.346836032  | 2.81E-07 |
| ZNF57    | -1.144641854 | 2.85779213   | -5.337862092 | 2.93E-07 |
| MPC1     | -1.321198982 | 4.504432436  | -5.337755236 | 2.93E-07 |
| RELL2    | 1.627893231  | 1.382060883  | 5.334759999  | 2.97E-07 |
| TYMP     | 2.206058353  | 6.899627215  | 5.334710203  | 2.97E-07 |
| CLDN1    | 2.831055858  | 7.025023562  | 5.318274268  | 3.21E-07 |
| CENPO    | 1.047336527  | 4.038011174  | 5.317869502  | 3.22E-07 |

|          |              |              |              |          |
|----------|--------------|--------------|--------------|----------|
| PDE1C    | -2.246879833 | 1.031165994  | -5.316306247 | 3.24E-07 |
| ROR1     | -2.592529088 | 2.71725726   | -5.314494743 | 3.27E-07 |
| GPR146   | -1.416157274 | 0.141998294  | -5.313103722 | 3.29E-07 |
| WNT2     | 2.889018335  | 1.140446684  | 5.310914869  | 3.33E-07 |
| C10orf55 | 2.43216931   | 0.16767762   | 5.310426194  | 3.34E-07 |
| KIAA1958 | -1.511394314 | 4.078584208  | -5.310407418 | 3.34E-07 |
| SNRPD1   | 1.030893017  | 5.911582601  | 5.309621174  | 3.35E-07 |
| SLC2A4   | -2.797955376 | 1.097166175  | -5.30084259  | 3.49E-07 |
| GTF2IRD2 | -1.349827735 | 1.130130821  | -5.288611159 | 3.70E-07 |
| FUT9     | -5.291932439 | -1.122431857 | -5.284175995 | 3.77E-07 |
| PTGER3   | -3.162524266 | 1.635549807  | -5.282461521 | 3.81E-07 |
| PI16     | -4.183247293 | -0.811148882 | -5.281766323 | 3.82E-07 |
| NEUROD1  | -3.206160313 | -3.26102481  | -5.28137096  | 3.83E-07 |
| GATA5    | -3.903978865 | -2.050670831 | -5.275237871 | 3.94E-07 |
| PFDN4    | 1.012753483  | 4.056006383  | 5.274671436  | 3.95E-07 |
| H1-4     | 1.817650669  | 0.566105792  | 5.274096541  | 3.96E-07 |
| TAF4A2   | -1.688143996 | -0.334692124 | -5.271606973 | 4.00E-07 |
| WNT3     | 1.971988633  | 1.53441789   | 5.270622046  | 4.02E-07 |
| SMC4     | 1.13445251   | 6.795435165  | 5.267868449  | 4.08E-07 |
| S100A3   | 2.23337819   | 1.120628591  | 5.266838272  | 4.10E-07 |
| CBX2     | 2.620360313  | 3.766946568  | 5.265037752  | 4.13E-07 |
| LOXL2    | 1.936657482  | 5.654254499  | 5.259201686  | 4.24E-07 |
| MMP1     | 3.416743961  | 6.061346649  | 5.253935262  | 4.35E-07 |
| ESPN     | 2.367911257  | 4.659716045  | 5.252407674  | 4.38E-07 |
| DLEU7    | 1.488339556  | -0.05021254  | 5.245634775  | 4.52E-07 |
| C1QTNF6  | 1.935105909  | 4.090622582  | 5.243881483  | 4.56E-07 |
| CDC25A   | 1.41667153   | 3.21256842   | 5.243527109  | 4.57E-07 |
| TNXB     | -3.377118814 | 3.751051611  | -5.239052756 | 4.66E-07 |
| CALCOCO1 | -1.02084409  | 5.612603153  | -5.23868658  | 4.67E-07 |
| HMGB2    | 1.227039087  | 6.303016284  | 5.235459608  | 4.74E-07 |
| FAXDC2   | -1.728291064 | 3.17471285   | -5.231459257 | 4.83E-07 |
| KCNK2    | -3.552926875 | -1.608322795 | -5.231080865 | 4.84E-07 |
| FAM110D  | -1.915182236 | -0.018916064 | -5.227824907 | 4.91E-07 |
| FERMT1   | 1.777229652  | 6.515619526  | 5.223050514  | 5.03E-07 |
| ABCA8    | -3.508863814 | 1.164046561  | -5.206154496 | 5.44E-07 |
| ME3      | -2.240439794 | 2.194332532  | -5.201804529 | 5.55E-07 |
| NFIC     | -1.218038214 | 7.925236702  | -5.200790017 | 5.57E-07 |
| SCTR     | -2.958872238 | -1.414652423 | -5.200780667 | 5.57E-07 |
| GDF7     | -2.43760064  | -0.003150017 | -5.189850276 | 5.87E-07 |
| CEP72    | 1.309301725  | 3.306836445  | 5.18352236   | 6.04E-07 |
| ZNF385B  | -3.352447477 | -0.664521705 | -5.180032653 | 6.14E-07 |
| TREM1    | 2.849684792  | 1.088710829  | 5.175735298  | 6.26E-07 |
| HOXD9    | 2.171538529  | 1.52150811   | 5.174188262  | 6.31E-07 |
| VIPR2    | -2.692831317 | -1.655699372 | -5.17287761  | 6.35E-07 |
| UPRT     | -1.189519849 | 2.842706469  | -5.171709967 | 6.38E-07 |
| MCM3     | 1.077546258  | 6.918301532  | 5.168912192  | 6.46E-07 |
| GGCT     | 1.060800146  | 5.158547947  | 5.165596466  | 6.56E-07 |
| CKLF     | 1.294121573  | 2.563399134  | 5.155651984  | 6.87E-07 |
| DNAJC28  | -1.36291436  | -0.164358033 | -5.147839407 | 7.12E-07 |
| ITGA2    | 1.58827521   | 6.786078095  | 5.144732224  | 7.23E-07 |
| CYFIP2   | -2.239728632 | 4.027976078  | -5.141511156 | 7.34E-07 |
| FAM13A   | -1.426819568 | 4.198918576  | -5.139414268 | 7.41E-07 |
| ERO1B    | -2.049010879 | 3.684841848  | -5.131397868 | 7.69E-07 |

|          |              |              |              |          |
|----------|--------------|--------------|--------------|----------|
| TFAP2A   | 2.779326815  | 5.341094341  | 5.130477541  | 7.72E-07 |
| MYZAP    | -2.769369447 | 0.656508791  | -5.130302697 | 7.73E-07 |
| MITF     | -1.846344632 | 3.10284928   | -5.129116519 | 7.77E-07 |
| CMSS1    | 1.145632022  | 3.991635239  | 5.129113651  | 7.77E-07 |
| DLG2     | -2.276132199 | 0.390412249  | -5.127848736 | 7.81E-07 |
| OAS3     | 1.503072562  | 7.553306365  | 5.120595741  | 8.08E-07 |
| MMP14    | 1.466516716  | 8.014102648  | 5.112959595  | 8.37E-07 |
| KLHDC1   | -1.536252855 | 1.144322696  | -5.107184262 | 8.59E-07 |
| THY1     | 1.910463686  | 5.684209038  | 5.103118849  | 8.75E-07 |
| TXNIP    | -1.98312687  | 8.165599802  | -5.102239663 | 8.79E-07 |
| FCGR3A   | 2.564242292  | 3.874811456  | 5.097463765  | 8.98E-07 |
| GBGT1    | -2.015495238 | 1.656365952  | -5.095811765 | 9.05E-07 |
| COL1A1   | 2.61161065   | 11.0357415   | 5.092645379  | 9.18E-07 |
| BID      | 1.055258194  | 4.911407175  | 5.090740171  | 9.27E-07 |
| RHBDF2   | 1.196988967  | 6.065136727  | 5.090252766  | 9.29E-07 |
| COL10A1  | 4.186447821  | 2.982248478  | 5.088438432  | 9.36E-07 |
| C20orf27 | 1.081623811  | 4.804417534  | 5.085560222  | 9.49E-07 |
| SLC5A12  | 3.228423497  | 0.958195761  | 5.084707722  | 9.53E-07 |
| NPM3     | 1.281877013  | 3.004401966  | 5.084053965  | 9.55E-07 |
| SORBS2   | -2.784199481 | 3.797980595  | -5.083224671 | 9.59E-07 |
| YDJC     | 1.082133186  | 4.847228225  | 5.078795749  | 9.79E-07 |
| PDGFD    | -2.196676443 | 2.483770905  | -5.07857898  | 9.80E-07 |
| KRT80    | 3.047009774  | 5.238435424  | 5.077194033  | 9.86E-07 |
| KIT      | -2.531376385 | 2.68555282   | -5.063454999 | 1.05E-06 |
| PSAPL1   | -4.155676722 | -0.831007364 | -5.062202013 | 1.06E-06 |
| GFRA1    | -3.386343643 | 1.572231334  | -5.059831041 | 1.07E-06 |
| TAP2     | 1.161699906  | 5.468619979  | 5.057613792  | 1.08E-06 |
| PAFAH1B3 | 1.230429745  | 4.327713516  | 5.053062979  | 1.10E-06 |
| KAT2B    | -1.55112626  | 4.44270189   | -5.051141608 | 1.11E-06 |
| GNB1L    | 1.132417136  | 2.690971696  | 5.045407105  | 1.14E-06 |
| KLF9     | -1.812053199 | 5.420344506  | -5.043134165 | 1.15E-06 |
| SLC4A11  | 2.235178154  | 4.390299207  | 5.041002539  | 1.16E-06 |
| CST1     | 3.922135005  | 3.314855425  | 5.029909089  | 1.22E-06 |
| IKBIP    | 1.270152764  | 3.701670116  | 5.01406944   | 1.31E-06 |
| PFKP     | 1.14400432   | 7.007248002  | 5.011632145  | 1.33E-06 |
| MZT1     | 1.014161344  | 4.721066191  | 5.009103171  | 1.34E-06 |
| COBLL1   | -1.43317818  | 6.144516865  | -5.008073062 | 1.35E-06 |
| ITIH5    | -2.293611251 | 3.698783361  | -5.006731888 | 1.36E-06 |
| STRIP2   | 2.06277606   | 2.846864187  | 5.004996173  | 1.37E-06 |
| RBPM2    | -2.543655664 | 2.007710518  | -5.002960948 | 1.38E-06 |
| BCL11B   | 2.064167737  | 4.502479247  | 4.999913906  | 1.40E-06 |
| STRA6    | 3.12129597   | 2.818498744  | 4.999391057  | 1.40E-06 |
| SLC5A5   | -4.048131565 | -0.409663354 | -4.989594909 | 1.47E-06 |
| XPR1     | 1.182357614  | 6.390744533  | 4.98775298   | 1.48E-06 |
| BICD1    | 1.110790185  | 4.270978807  | 4.984416484  | 1.50E-06 |
| MMP10    | 3.609638256  | 2.256079505  | 4.9832035    | 1.51E-06 |
| FMOD     | -2.218512445 | 5.268493919  | -4.980654306 | 1.53E-06 |
| SPINDOC  | 1.12660923   | 4.088300827  | 4.97416989   | 1.57E-06 |
| XKR4     | -2.990668388 | -1.676408745 | -4.973683244 | 1.58E-06 |
| RAI2     | -2.153568142 | 2.643418982  | -4.97277832  | 1.58E-06 |
| CCDC149  | -1.471763328 | 3.258556994  | -4.969563247 | 1.61E-06 |
| CACNA2D2 | -2.238705451 | 0.968375973  | -4.967414654 | 1.62E-06 |
| PRKACB   | -1.61433883  | 4.982549009  | -4.958134966 | 1.69E-06 |

|          |              |              |              |          |
|----------|--------------|--------------|--------------|----------|
| LDHA     | 1.263665909  | 9.694494211  | 4.956496757  | 1.70E-06 |
| NWD1     | -2.903376686 | 0.356851677  | -4.956453493 | 1.71E-06 |
| TUBA1C   | 1.216826577  | 7.797058698  | 4.955131337  | 1.72E-06 |
| PAFAH2   | -1.160324828 | 4.335718079  | -4.95368869  | 1.73E-06 |
| FBP2     | -2.919332037 | -1.090734305 | -4.951291185 | 1.75E-06 |
| RGS11    | -2.464938329 | 0.596559191  | -4.951040963 | 1.75E-06 |
| LIMK1    | 1.102007714  | 6.008737654  | 4.948306341  | 1.77E-06 |
| PRRX2    | 2.226361202  | 2.734075101  | 4.946324851  | 1.78E-06 |
| CDHR3    | -2.024665519 | 1.508993127  | -4.941291807 | 1.83E-06 |
| RTN4R    | 1.539981138  | 3.127237342  | 4.939123029  | 1.84E-06 |
| ADORA2B  | 2.298944309  | 3.086267775  | 4.939063968  | 1.84E-06 |
| CEP85L   | -1.436203958 | 2.51311624   | -4.935327591 | 1.88E-06 |
| SLC16A3  | 1.353955812  | 5.989396884  | 4.934459076  | 1.88E-06 |
| PMM1     | -1.145917393 | 3.908323981  | -4.921447521 | 2.00E-06 |
| TNFSF9   | 2.634583043  | 1.911214102  | 4.921165614  | 2.00E-06 |
| CTPS1    | 1.112188183  | 5.269109275  | 4.920983731  | 2.00E-06 |
| EPM2A    | -1.194010087 | 2.071890083  | -4.920880136 | 2.00E-06 |
| PCSK2    | -3.210288668 | -2.01638526  | -4.917179118 | 2.03E-06 |
| ZNF471   | -2.368816817 | 0.444185672  | -4.915182984 | 2.05E-06 |
| ASAP3    | -1.531746465 | 4.182089792  | -4.912137766 | 2.08E-06 |
| CARD14   | 1.977006817  | 3.397874003  | 4.910343303  | 2.10E-06 |
| SH2D2A   | 1.460672283  | 2.702010327  | 4.907528894  | 2.12E-06 |
| API51    | 1.062505099  | 4.918122565  | 4.905576495  | 2.14E-06 |
| AR       | -2.257255772 | 0.762229118  | -4.901614676 | 2.18E-06 |
| TMEM8B   | -1.46379023  | 3.472307036  | -4.8967183   | 2.23E-06 |
| NEURL3   | 2.654070083  | 0.422919542  | 4.893257584  | 2.26E-06 |
| PSME2    | 1.008243066  | 6.490023122  | 4.892505717  | 2.27E-06 |
| EPB41L4A | -1.995818213 | 2.798900998  | -4.891369847 | 2.28E-06 |
| SPP1     | 3.770315242  | 5.761544869  | 4.888692988  | 2.31E-06 |
| IQANK1   | 1.920584449  | 5.523595799  | 4.887601649  | 2.32E-06 |
| IL4I1    | 1.866563732  | 2.17139738   | 4.884767491  | 2.35E-06 |
| ETFBKMT  | -1.086313126 | 1.523850077  | -4.878612713 | 2.42E-06 |
| ADGRF4   | 3.423624092  | 2.314117007  | 4.87729672   | 2.43E-06 |
| NMI      | 1.034361488  | 4.98253026   | 4.873672031  | 2.47E-06 |
| OLR1     | 2.860650049  | 1.72606086   | 4.871437385  | 2.49E-06 |
| PHYHD1   | -2.577697229 | 1.575468466  | -4.870157387 | 2.51E-06 |
| TNS4     | 3.69596674   | 7.220297571  | 4.868093586  | 2.53E-06 |
| KCNB1    | -3.429198669 | -0.901918742 | -4.860474254 | 2.62E-06 |
| NTN4     | -1.856692638 | 4.100803425  | -4.858544473 | 2.64E-06 |
| NR2F2    | -1.652613977 | 5.62146542   | -4.850997625 | 2.73E-06 |
| BMP1     | 1.311530399  | 5.880873308  | 4.850160581  | 2.74E-06 |
| RGS19    | 1.146392447  | 3.755534301  | 4.847359062  | 2.78E-06 |
| BHLHA15  | -2.455064461 | -0.54319124  | -4.842318318 | 2.84E-06 |
| NCAPD2   | 1.115337047  | 7.378952008  | 4.839108134  | 2.88E-06 |
| ENO1     | 1.086444596  | 9.792768842  | 4.835606594  | 2.92E-06 |
| ZNF852   | -1.237817347 | 1.135115322  | -4.835132384 | 2.93E-06 |
| MT-CO1   | -1.369411703 | 14.0907485   | -4.835046038 | 2.93E-06 |
| AK9      | -1.360077102 | 2.217649252  | -4.832477393 | 2.97E-06 |
| IFITM3   | 1.393003773  | 8.343619953  | 4.831387617  | 2.98E-06 |
| TACSTD2  | 2.393950244  | 8.044215331  | 4.83049914   | 2.99E-06 |
| ADAMTSL1 | -2.54441233  | 1.68897542   | -4.824350285 | 3.07E-06 |
| MMP9     | 2.788129035  | 4.247312694  | 4.821194033  | 3.12E-06 |
| NEGR1    | -2.433790739 | 1.900716177  | -4.817149186 | 3.17E-06 |

|         |              |              |              |          |
|---------|--------------|--------------|--------------|----------|
| SLC4A2  | -1.134941602 | 6.432131324  | -4.815216381 | 3.20E-06 |
| C7      | -4.365704084 | 1.313914212  | -4.813093554 | 3.23E-06 |
| PRR5L   | 1.919723569  | 3.136231631  | 4.811318794  | 3.26E-06 |
| TRIB3   | 1.860960546  | 4.628061667  | 4.80941444   | 3.28E-06 |
| HOXC13  | 3.533204527  | 1.207496823  | 4.805545995  | 3.34E-06 |
| TSC22D3 | -1.69698664  | 5.950511016  | -4.803183548 | 3.37E-06 |
| ITPR1   | -1.571706586 | 4.270296062  | -4.801532688 | 3.40E-06 |
| TAP1    | 1.423441455  | 7.258966314  | 4.795406209  | 3.49E-06 |
| GRIK3   | -3.178289522 | -1.799455254 | -4.79459479  | 3.50E-06 |
| MAGI3   | -1.121061382 | 4.860560201  | -4.790354785 | 3.57E-06 |
| ECHDC2  | -1.348816803 | 5.062298193  | -4.789761791 | 3.58E-06 |
| MFSD2A  | 1.874019481  | 4.18541551   | 4.789126142  | 3.59E-06 |
| PGF     | 1.971387696  | 3.415805897  | 4.78600459   | 3.64E-06 |
| THRB    | -2.181131263 | 3.610731494  | -4.785275524 | 3.65E-06 |
| CCDC34  | 1.318058501  | 3.654485444  | 4.783876275  | 3.67E-06 |
| COL2A1  | -3.716505507 | -1.028632255 | -4.780255432 | 3.73E-06 |
| EPOP    | 1.605130741  | 3.211595369  | 4.779762942  | 3.74E-06 |
| PLAC9   | -1.833731694 | 1.089944777  | -4.777885702 | 3.77E-06 |
| C4orf46 | 1.026813953  | 3.774885009  | 4.777280475  | 3.78E-06 |
| IER5L   | 1.147044149  | 4.428160435  | 4.765130676  | 3.99E-06 |
| MUCL3   | -6.064147305 | 1.389507995  | -4.759411601 | 4.09E-06 |
| HAPLN3  | 1.498152289  | 3.406693815  | 4.755237861  | 4.17E-06 |
| NATD1   | -1.204113711 | 3.640797705  | -4.746395212 | 4.33E-06 |
| DIXDC1  | -1.448461342 | 3.697350149  | -4.742849058 | 4.40E-06 |
| ZNF626  | -2.382339115 | 0.725838697  | -4.740623541 | 4.44E-06 |
| MDK     | 1.740601444  | 6.823080803  | 4.738893574  | 4.47E-06 |
| CTSV    | 2.209854408  | 4.326784459  | 4.7383434    | 4.48E-06 |
| RCAN2   | -1.992035412 | 3.158036424  | -4.736630849 | 4.52E-06 |
| DENND2B | -1.003672011 | 6.296362703  | -4.730994727 | 4.63E-06 |
| IDH2    | -1.205850173 | 6.91846638   | -4.730936919 | 4.63E-06 |
| KCNJ16  | -4.124291085 | -1.438657262 | -4.730121825 | 4.65E-06 |
| GMPR    | -2.137946853 | 1.574836032  | -4.728727498 | 4.68E-06 |
| PAQR4   | 1.195679805  | 4.546548507  | 4.72716502   | 4.71E-06 |
| FMO5    | -2.971001875 | 2.848784323  | -4.716025662 | 4.94E-06 |
| LAMC2   | 2.369745603  | 8.139228746  | 4.714651301  | 4.97E-06 |
| CCDC110 | -2.174718827 | -0.439726337 | -4.713965008 | 4.99E-06 |
| LDHD    | -2.300982635 | 2.420553876  | -4.7089246   | 5.10E-06 |
| ECE2    | 1.175343973  | 3.656717195  | 4.708882967  | 5.10E-06 |
| MMD     | 1.27274886   | 3.91190777   | 4.701531527  | 5.26E-06 |
| TCEA3   | -1.665486941 | 4.477300018  | -4.700105876 | 5.30E-06 |
| SPTBN4  | -2.208394671 | 0.324428652  | -4.700078364 | 5.30E-06 |
| APOC1   | 2.304696339  | 3.374164772  | 4.696402179  | 5.38E-06 |
| COX6B2  | 2.530370454  | 0.561590363  | 4.694329348  | 5.43E-06 |
| CAPN9   | -3.976941312 | -0.260539752 | -4.688795358 | 5.56E-06 |
| SOX11   | 2.387682811  | -0.225744431 | 4.685804277  | 5.64E-06 |
| HPGD    | -3.136652259 | 3.943975328  | -4.682419025 | 5.72E-06 |
| GAS2L3  | 1.339608788  | 3.646488159  | 4.679386613  | 5.79E-06 |
| ITGA8   | -2.462372219 | 2.77235547   | -4.676234293 | 5.87E-06 |
| APLP1   | -2.743775127 | 1.894391345  | -4.674646991 | 5.91E-06 |
| LYVE1   | -2.317454718 | 1.144564506  | -4.67379397  | 5.94E-06 |
| ABRACL  | 1.047052995  | 4.840032242  | 4.669309059  | 6.05E-06 |
| RHOV    | 3.082554327  | 4.144785916  | 4.668472336  | 6.07E-06 |
| HES4    | 1.648389246  | 3.95869157   | 4.667865682  | 6.09E-06 |

|          |              |              |              |          |
|----------|--------------|--------------|--------------|----------|
| HIF3A    | -3.25694205  | 1.652385461  | -4.661717976 | 6.25E-06 |
| RYSR2    | -2.601468538 | 1.643499598  | -4.66026376  | 6.29E-06 |
| MAMDC2   | -2.954189399 | 1.272996029  | -4.654703516 | 6.45E-06 |
| PPP1R35  | 1.026485579  | 3.957408582  | 4.6543124    | 6.46E-06 |
| LRRC2    | -2.710010135 | -0.824629944 | -4.653713262 | 6.47E-06 |
| ADHFE1   | -2.532141914 | 0.559658388  | -4.651311813 | 6.54E-06 |
| KIAA0513 | -1.509171073 | 4.298735297  | -4.649985019 | 6.58E-06 |
| WDR34    | 1.006010774  | 5.676949892  | 4.643810236  | 6.75E-06 |
| SYNE1    | -1.944913818 | 4.640225605  | -4.643036806 | 6.78E-06 |
| NFIX     | -1.103747963 | 6.986217565  | -4.640433517 | 6.85E-06 |
| CYB5A    | -1.249669946 | 4.935024767  | -4.630471379 | 7.15E-06 |
| ZP3      | 1.63341368   | 2.091416171  | 4.628404336  | 7.22E-06 |
| CCL20    | 3.252825542  | 3.831022803  | 4.626835593  | 7.27E-06 |
| HOMER2   | -2.629122584 | 3.949631488  | -4.626537972 | 7.28E-06 |
| GPRC5C   | -2.272186499 | 5.087155715  | -4.625893224 | 7.30E-06 |
| TNFRSF4  | 1.47527133   | 1.081091437  | 4.624401093  | 7.34E-06 |
| GPT      | -2.273419149 | 1.34623387   | -4.622176465 | 7.41E-06 |
| HSPB7    | -3.048957943 | 1.664752883  | -4.621455854 | 7.44E-06 |
| GC       | -4.139973316 | -2.452374453 | -4.621429895 | 7.44E-06 |
| H2BU1    | 1.967142501  | -0.009769219 | 4.618603096  | 7.53E-06 |
| PRRG3    | -2.228193093 | 0.758743458  | -4.618067234 | 7.54E-06 |
| STAT1    | 1.293341344  | 8.254959457  | 4.618015742  | 7.55E-06 |
| LDB3     | -2.300632599 | 0.59778757   | -4.617962865 | 7.55E-06 |
| TESMIN   | 1.90825234   | 2.71209153   | 4.612985256  | 7.71E-06 |
| FHL1     | -2.337941488 | 4.710072742  | -4.6119053   | 7.75E-06 |
| C22orf23 | -1.927891363 | 0.326395974  | -4.610329918 | 7.80E-06 |
| PDE7B    | -1.662006675 | 1.398875865  | -4.610189457 | 7.80E-06 |
| HIPK2    | -1.19107791  | 7.003866749  | -4.608945831 | 7.85E-06 |
| NUP62CL  | 1.813389515  | 1.619663957  | 4.605589062  | 7.96E-06 |
| S100A11  | 1.38303454   | 9.438824333  | 4.602826663  | 8.05E-06 |
| CDH13    | 1.953266975  | 4.891743481  | 4.600641948  | 8.13E-06 |
| KRT17    | 4.793866732  | 8.679048376  | 4.599627319  | 8.16E-06 |
| PSMB9    | 1.709777325  | 5.300588489  | 4.596339863  | 8.28E-06 |
| MARVELD3 | 1.396267075  | 4.108740721  | 4.595451007  | 8.31E-06 |
| ARHGAP39 | 1.113809616  | 4.324452129  | 4.595343853  | 8.31E-06 |
| DUSP10   | 1.408898572  | 3.584949314  | 4.592595414  | 8.41E-06 |
| IFI27L2  | 1.357377749  | 3.885298593  | 4.592084122  | 8.43E-06 |
| FOXP1    | -1.103044027 | 6.170426972  | -4.587353699 | 8.60E-06 |
| MYOCD    | -3.013879682 | 1.346642389  | -4.586149034 | 8.65E-06 |
| CXCL6    | 3.015478301  | 2.296446046  | 4.585090583  | 8.69E-06 |
| SNAI3    | -1.429715432 | -0.025935732 | -4.58428788  | 8.72E-06 |
| GJB3     | 2.417783851  | 5.227546358  | 4.583359073  | 8.75E-06 |
| CELF4    | -2.412258496 | -1.649087366 | -4.582769975 | 8.77E-06 |
| MT-CYB   | -1.168719974 | 12.59319362  | -4.576688029 | 9.00E-06 |
| B3GNT5   | 1.493628551  | 6.290667576  | 4.576119792  | 9.03E-06 |
| SLC2A12  | -2.414581561 | 2.889029272  | -4.571627688 | 9.20E-06 |
| GRIN2D   | 2.729301722  | 4.413424335  | 4.565001982  | 9.46E-06 |
| APOBEC3B | 2.058895584  | 3.050306307  | 4.564707282  | 9.47E-06 |
| C1QTNF7  | -2.336755381 | -0.550765379 | -4.56387353  | 9.51E-06 |
| SEM1     | 1.118858243  | 6.677711335  | 4.56281781   | 9.55E-06 |
| AMT      | -1.354690824 | 2.249727329  | -4.562788332 | 9.55E-06 |
| PCDH9    | -3.264960534 | 0.05870579   | -4.561289667 | 9.61E-06 |
| FAM149A  | -2.326968355 | 1.880544905  | -4.560800498 | 9.63E-06 |



|           |              |              |              |          |
|-----------|--------------|--------------|--------------|----------|
| NEDD4L    | -1.304447571 | 6.34251      | -4.557385721 | 9.77E-06 |
| BMX       | -1.918480124 | -0.561602732 | -4.555022429 | 9.87E-06 |
| ODAM      | -4.009839422 | -0.991451613 | -4.548735079 | 1.01E-05 |
| RAP1GAP2  | -1.45385481  | 5.569782094  | -4.547012863 | 1.02E-05 |
| RIMS3     | -2.105186395 | 2.361135815  | -4.546375476 | 1.02E-05 |
| SYPL2     | -1.94904174  | -0.632317951 | -4.541660669 | 1.04E-05 |
| FAM174B   | -1.794087108 | 3.380288919  | -4.54066694  | 1.05E-05 |
| MRPL14    | 1.009474228  | 5.042539133  | 4.539590615  | 1.05E-05 |
| E2F8      | 1.297847644  | 4.023829168  | 4.537742895  | 1.06E-05 |
| TREM2     | 2.253233266  | 1.82422473   | 4.537145274  | 1.06E-05 |
| HSPB6     | -2.917706283 | 2.591624696  | -4.534956605 | 1.07E-05 |
| CCN4      | 2.257636874  | 2.337740402  | 4.53248805   | 1.09E-05 |
| MROH7     | -1.920600937 | -0.118245512 | -4.529381793 | 1.10E-05 |
| NUCB2     | -1.098281754 | 5.531933096  | -4.527444994 | 1.11E-05 |
| RPRM      | -2.954300391 | -1.242583433 | -4.525371512 | 1.12E-05 |
| ANGPTL1   | -2.714000707 | 0.270719219  | -4.519900764 | 1.15E-05 |
| ZC3H6     | -1.123539122 | 3.994535828  | -4.518150382 | 1.15E-05 |
| PARP12    | 1.028182553  | 5.81643324   | 4.517857933  | 1.16E-05 |
| CRYBG2    | 2.615144361  | 4.933138422  | 4.516052408  | 1.16E-05 |
| PLL       | -1.883732845 | 4.391522709  | -4.515883876 | 1.17E-05 |
| GABARAPL1 | -1.231411087 | 5.227185232  | -4.513322678 | 1.18E-05 |
| STC2      | 2.41248639   | 3.21711796   | 4.5124662    | 1.18E-05 |
| LY6H      | -2.30527804  | -2.251759354 | -4.508970433 | 1.20E-05 |
| COL4A3    | -2.517649314 | 0.256706152  | -4.507747303 | 1.21E-05 |
| LONRF2    | -3.519443208 | 1.37256667   | -4.506279941 | 1.21E-05 |
| TDRD1     | -2.579701793 | -2.135391162 | -4.504360926 | 1.22E-05 |
| COL11A1   | 4.294224944  | 2.472590982  | 4.50421261   | 1.22E-05 |
| SCN7A     | -3.334306342 | 0.039922947  | -4.501953358 | 1.24E-05 |
| PDE2A     | -1.713548948 | 2.39400625   | -4.500301217 | 1.24E-05 |
| CBX1      | 1.127597867  | 5.384288707  | 4.499672568  | 1.25E-05 |
| HOXA11    | 2.839361406  | 0.518619947  | 4.499441688  | 1.25E-05 |
| EFNB1     | 1.492877577  | 6.774065225  | 4.496639722  | 1.26E-05 |
| CCBE1     | -2.425019231 | -0.102497104 | -4.496141814 | 1.27E-05 |
| DEPTOR    | -2.433493691 | 3.438336419  | -4.489340953 | 1.30E-05 |
| CADM3     | -3.185227925 | -0.796152281 | -4.488038204 | 1.31E-05 |
| GPRASP1   | -1.551403401 | 1.583615995  | -4.487482414 | 1.31E-05 |
| MROH8     | -1.189849505 | 0.372971524  | -4.486164045 | 1.32E-05 |
| TBC1D9    | -1.241049272 | 4.927861613  | -4.483535821 | 1.33E-05 |
| CLDN16    | 2.256280337  | -0.137752771 | 4.483031444  | 1.34E-05 |
| CCDC186   | -1.010284679 | 5.654491732  | -4.482780936 | 1.34E-05 |
| TNS2      | -1.32272044  | 5.62543256   | -4.481022932 | 1.35E-05 |
| PIK3C2G   | -3.881050319 | 1.140881892  | -4.478666825 | 1.36E-05 |
| TNFRSF18  | 2.405711963  | 1.96951408   | 4.476764209  | 1.37E-05 |
| ABCA13    | 3.530084391  | 3.231496737  | 4.473363268  | 1.39E-05 |
| RNF180    | -1.95233074  | 0.829992585  | -4.471671786 | 1.40E-05 |
| TMSB10    | 1.110806884  | 9.175601611  | 4.469802177  | 1.41E-05 |
| SLC39A10  | 1.050084868  | 4.958727105  | 4.469655716  | 1.41E-05 |
| ACAN      | 2.320490367  | 2.115551246  | 4.468259856  | 1.42E-05 |
| RAC2      | 1.539954991  | 5.117055934  | 4.466810026  | 1.43E-05 |
| ZNF662    | -2.138032914 | 0.458332921  | -4.464445904 | 1.45E-05 |
| WDR76     | 1.007659967  | 3.622668762  | 4.461406976  | 1.46E-05 |
| FAM83H    | 1.432851084  | 8.2897501    | 4.459941865  | 1.47E-05 |
| CYSTM1    | -2.432308107 | 6.042596453  | -4.456217777 | 1.50E-05 |

|          |              |              |              |          |
|----------|--------------|--------------|--------------|----------|
| SLC2A1   | 2.356846213  | 8.189703509  | 4.454776187  | 1.51E-05 |
| SCGN     | -2.853004082 | -3.104743721 | -4.45380911  | 1.51E-05 |
| CTNND2   | -2.649067906 | -2.075146991 | -4.452279992 | 1.52E-05 |
| YPEL1    | -1.725297405 | 0.165094029  | -4.45012864  | 1.54E-05 |
| CELF3    | -2.692901577 | -2.298146693 | -4.442520647 | 1.58E-05 |
| SQLE     | 1.594498197  | 6.291538355  | 4.441957048  | 1.59E-05 |
| GJB4     | 2.871097039  | 1.811360287  | 4.441504384  | 1.59E-05 |
| KCNAB1   | -1.225681902 | 1.438907805  | -4.441337268 | 1.59E-05 |
| GPR19    | 1.638905602  | 0.354052006  | 4.437610789  | 1.62E-05 |
| RPS6KA5  | -1.135126384 | 4.273426017  | -4.437476933 | 1.62E-05 |
| SERPINA5 | -3.450722409 | 0.035742933  | -4.436673087 | 1.62E-05 |
| FABP3    | -1.736428884 | 1.501369564  | -4.436100527 | 1.63E-05 |
| CHI3L1   | 2.568725471  | 4.423579701  | 4.431336629  | 1.66E-05 |
| WIPF3    | -2.234585229 | 2.314108371  | -4.43130269  | 1.66E-05 |
| TMTC2    | -1.135898847 | 4.32354924   | -4.428560915 | 1.68E-05 |
| MT-ND3   | -1.136048115 | 9.242342245  | -4.427646938 | 1.69E-05 |
| KCNJ11   | -2.452701257 | 0.61655804   | -4.423267969 | 1.72E-05 |
| B4GALNT2 | -3.739351517 | -0.955048146 | -4.412678815 | 1.79E-05 |
| ZC3HAV1L | 1.00750098   | 3.156723376  | 4.408558588  | 1.83E-05 |
| UGT2B15  | -3.945430946 | -1.45766552  | -4.408327412 | 1.83E-05 |
| KIF24    | 1.062240156  | 3.531119522  | 4.406333206  | 1.84E-05 |
| DHFR     | 1.00826138   | 4.167248389  | 4.405153626  | 1.85E-05 |
| ABI3BP   | -2.76268384  | 3.104243777  | -4.403606001 | 1.86E-05 |
| SH3BGR   | -1.391409002 | 0.409630963  | -4.399455813 | 1.90E-05 |
| GGH      | 1.49559221   | 5.071278264  | 4.399025318  | 1.90E-05 |
| STMN2    | -2.546598404 | -2.256624276 | -4.394362316 | 1.94E-05 |
| TOM1L2   | -1.176706851 | 6.43661354   | -4.391919406 | 1.96E-05 |
| C11orf54 | -1.015542796 | 4.243243523  | -4.391570499 | 1.96E-05 |
| F10      | -2.003292122 | 0.453381996  | -4.391546493 | 1.96E-05 |
| SERPINB9 | 1.496630384  | 4.765829598  | 4.391346778  | 1.96E-05 |
| MEX3A    | 1.922684958  | 3.100296581  | 4.38872202   | 1.98E-05 |
| ATP1B3   | 1.418088406  | 7.739882269  | 4.382654769  | 2.03E-05 |
| LAMB2    | -1.176793676 | 7.040651874  | -4.382201837 | 2.04E-05 |
| COQ8A    | -1.372468641 | 5.346892898  | -4.379603227 | 2.06E-05 |
| ATP1A2   | -3.281133177 | 0.158935382  | -4.378509023 | 2.07E-05 |
| ADAMTS8  | -2.531899121 | 0.237465971  | -4.376454014 | 2.08E-05 |
| INPP5J   | -1.654613393 | 2.340168698  | -4.371420334 | 2.13E-05 |
| EIF4EBP3 | -1.160978922 | 0.798812124  | -4.369539909 | 2.14E-05 |
| PPFIBP2  | -1.324116453 | 5.083224125  | -4.369077592 | 2.15E-05 |
| PARP9    | 1.026510407  | 6.60211329   | 4.368447754  | 2.15E-05 |
| ST20     | 1.028216533  | 1.295580148  | 4.368222624  | 2.16E-05 |
| ZNF695   | 2.104480932  | 0.59111312   | 4.365984409  | 2.18E-05 |
| BTBD3    | -1.140924022 | 5.526037503  | -4.363459452 | 2.20E-05 |
| ATP8A1   | -2.502489804 | 3.811211525  | -4.362496607 | 2.21E-05 |
| DHRS7    | -1.022064557 | 5.192133028  | -4.358369022 | 2.25E-05 |
| AGTRAP   | 1.08488492   | 5.189102667  | 4.357807594  | 2.25E-05 |
| OSM      | 2.019487306  | 0.083068805  | 4.354637676  | 2.28E-05 |
| UNC13B   | -1.382443085 | 5.574557989  | -4.353839275 | 2.29E-05 |
| GAB2     | -1.354749452 | 4.359577837  | -4.352749546 | 2.30E-05 |
| STUM     | -3.027347992 | 0.034457001  | -4.352103152 | 2.30E-05 |
| KCNK3    | -2.244686877 | 0.633491197  | -4.348439121 | 2.34E-05 |
| ZC3H12A  | 1.435071108  | 6.164885157  | 4.346910702  | 2.35E-05 |
| IL1A     | 3.553894207  | 2.055479583  | 4.343524822  | 2.39E-05 |

|          |              |              |              |          |
|----------|--------------|--------------|--------------|----------|
| KYNU     | 2.397769641  | 3.700140936  | 4.34154529   | 2.41E-05 |
| PMEPA1   | 1.765552806  | 6.879157884  | 4.340092626  | 2.42E-05 |
| GNGT1    | 3.493693432  | 0.483481886  | 4.339138106  | 2.43E-05 |
| CD80     | 1.667895691  | -0.10343948  | 4.336761759  | 2.45E-05 |
| CHADL    | -1.337130602 | 1.244786336  | -4.335629768 | 2.47E-05 |
| ARRB1    | -1.821366945 | 3.992833631  | -4.335321529 | 2.47E-05 |
| APOE     | 2.180100787  | 5.998861685  | 4.335182626  | 2.47E-05 |
| RELL1    | -1.150960662 | 3.098082231  | -4.331721082 | 2.51E-05 |
| COL5A2   | 1.911264048  | 7.302346761  | 4.331265505  | 2.51E-05 |
| XDH      | 2.476599888  | 3.982908195  | 4.331115869  | 2.51E-05 |
| CTNNA2   | -2.260756972 | -3.097473969 | -4.331065866 | 2.51E-05 |
| MYORG    | -1.634843384 | 5.462892947  | -4.329580541 | 2.53E-05 |
| CLIC6    | -3.238186092 | 3.184242507  | -4.320406264 | 2.62E-05 |
| PTPRN2   | -3.029799022 | 2.889285927  | -4.320237071 | 2.63E-05 |
| TMOD1    | -2.275425662 | 1.274222228  | -4.318981793 | 2.64E-05 |
| FOXDI    | 2.469619778  | 2.175217395  | 4.31783579   | 2.65E-05 |
| WNT7B    | 3.71916095   | 4.189214756  | 4.316249025  | 2.67E-05 |
| SPARC    | 1.642176823  | 8.963851903  | 4.31588266   | 2.67E-05 |
| SERP2    | -1.903563895 | -0.396294878 | -4.315281077 | 2.68E-05 |
| VSIG1    | -4.037746204 | 2.356445664  | -4.31490719  | 2.68E-05 |
| PTK7     | 1.545260261  | 6.714002269  | 4.312796338  | 2.71E-05 |
| ADAMTS14 | 1.666879227  | 3.035597609  | 4.31093029   | 2.73E-05 |
| COL4A1   | 1.441155042  | 8.624400728  | 4.308852221  | 2.75E-05 |
| TM7SF2   | -1.497147682 | 3.700181993  | -4.307810395 | 2.76E-05 |
| NCF2     | 1.724390274  | 3.215251338  | 4.306670482  | 2.78E-05 |
| USP54    | -1.15178878  | 5.795654753  | -4.305911999 | 2.78E-05 |
| NRTN     | -1.495136072 | 1.15273401   | -4.305310283 | 2.79E-05 |
| GARNL3   | -1.056589447 | 2.042068099  | -4.297522497 | 2.88E-05 |
| CHN1     | 1.303698647  | 3.514622673  | 4.29659623   | 2.89E-05 |
| NRXN1    | -2.944473804 | -1.045300955 | -4.296447349 | 2.89E-05 |
| SLC26A9  | -3.553643985 | 2.066912751  | -4.295480494 | 2.90E-05 |
| FXD5     | 1.367277425  | 6.512324233  | 4.291353214  | 2.95E-05 |
| TCP11L2  | -1.213397839 | 3.650812646  | -4.29057539  | 2.96E-05 |
| SBSPON   | -2.074199694 | 2.158562455  | -4.284855319 | 3.03E-05 |
| FKBP5    | -1.765128891 | 6.282184679  | -4.284359375 | 3.04E-05 |
| PGM5     | -2.903967333 | 1.974825183  | -4.282255023 | 3.07E-05 |
| CHRNA5   | 1.300383652  | 1.807544011  | 4.277480713  | 3.13E-05 |
| AKR7A3   | -3.478792148 | 2.654646881  | -4.275669077 | 3.15E-05 |
| GCKR     | -2.732787008 | -0.626750608 | -4.27363539  | 3.17E-05 |
| CSF2     | 2.497709725  | -1.374792938 | 4.27303511   | 3.18E-05 |
| FZD4     | -1.469483455 | 3.983330444  | -4.271312716 | 3.20E-05 |
| WDR54    | 1.160436081  | 3.227510775  | 4.270866137  | 3.21E-05 |
| MADCAM1  | -1.784413465 | -0.74562038  | -4.269006328 | 3.23E-05 |
| MUC6     | -6.012313767 | 2.320068049  | -4.265452707 | 3.28E-05 |
| CD300LF  | 1.630441198  | 0.332501895  | 4.261720931  | 3.33E-05 |
| IL23A    | 1.636148761  | 0.79263269   | 4.260742781  | 3.34E-05 |
| NOTCH3   | 1.725885909  | 8.535565832  | 4.257026644  | 3.40E-05 |
| SYNPO2   | -2.89990706  | 5.033434467  | -4.253791655 | 3.44E-05 |
| PRDM16   | -2.95424621  | 2.25776028   | -4.25365993  | 3.44E-05 |
| FGG      | -3.637162264 | -2.796543443 | -4.250801644 | 3.48E-05 |
| SELENBP1 | -2.671943475 | 4.298976705  | -4.248995359 | 3.51E-05 |
| P3H1     | 1.003067312  | 5.127799301  | 4.248733458  | 3.51E-05 |
| H3C10    | 1.934932781  | 1.876160883  | 4.246980017  | 3.54E-05 |

|           |              |              |              |          |
|-----------|--------------|--------------|--------------|----------|
| KIAA1549L | 2.77796608   | 3.10011052   | 4.246685146  | 3.54E-05 |
| KLHDC8A   | -1.913506316 | 0.394492873  | -4.243459183 | 3.59E-05 |
| OSCAR     | 1.543396081  | 1.182429116  | 4.241290217  | 3.62E-05 |
| SLC28A3   | 2.493269601  | 3.116169829  | 4.235535582  | 3.70E-05 |
| ZNF132    | -1.099807112 | 1.413512919  | -4.233610151 | 3.73E-05 |
| FNDC1     | 2.59403512   | 3.498702703  | 4.233494581  | 3.73E-05 |
| HMGA2     | 2.975302116  | 3.33093041   | 4.229105851  | 3.80E-05 |
| LMF1      | -1.116432399 | 3.311941267  | -4.226482115 | 3.84E-05 |
| FRRS1L    | -2.685592288 | -1.252591634 | -4.224918448 | 3.86E-05 |
| MTRNR2L8  | -1.291167509 | 2.310018452  | -4.22336626  | 3.89E-05 |
| MT1H      | -2.83414565  | 0.023021497  | -4.221159923 | 3.92E-05 |
| KCTD17    | 1.140915522  | 3.335427971  | 4.219846633  | 3.94E-05 |
| CITED2    | -1.188535482 | 5.034290032  | -4.216153988 | 4.00E-05 |
| AGRN      | 1.109589489  | 9.018691573  | 4.214103031  | 4.04E-05 |
| SLC49A3   | -1.474619408 | 1.915543325  | -4.214090095 | 4.04E-05 |
| SULT1B1   | -3.923604614 | 2.427823734  | -4.208173442 | 4.13E-05 |
| LAMB4     | -2.235616228 | -1.344867319 | -4.207558745 | 4.14E-05 |
| ZMAT1     | -2.327755011 | 1.227727331  | -4.206585663 | 4.16E-05 |
| MT-ND1    | -1.062221606 | 11.78915838  | -4.206002859 | 4.17E-05 |
| NXPH4     | 3.190632965  | 2.55984021   | 4.203412266  | 4.21E-05 |
| COL12A1   | 1.730839085  | 7.73600226   | 4.201992214  | 4.24E-05 |
| IFI6      | 2.024672556  | 7.241198144  | 4.200464367  | 4.26E-05 |
| GNAO1     | -2.086880158 | 1.90270427   | -4.200271002 | 4.27E-05 |
| MTRNR2L12 | -1.296472865 | 3.087164385  | -4.197810755 | 4.31E-05 |
| MYO1B     | 1.172209995  | 7.121136911  | 4.197415887  | 4.32E-05 |
| FBXO43    | 1.580889726  | -0.160709185 | 4.195855597  | 4.34E-05 |
| RHOU      | -2.012433665 | 3.943501424  | -4.195395308 | 4.35E-05 |
| ABCA12    | 3.276988103  | 3.590176217  | 4.192806039  | 4.40E-05 |
| B3GNT6    | -3.724617207 | -0.28004756  | -4.192681639 | 4.40E-05 |
| TMEM25    | -1.201066124 | 3.329196381  | -4.188683408 | 4.47E-05 |
| CHST1     | 2.116230706  | 2.571389313  | 4.18512903   | 4.53E-05 |
| ADAM33    | -2.202734035 | 1.285394126  | -4.18381871  | 4.56E-05 |
| UNC80     | -2.346453904 | -2.252499613 | -4.181975741 | 4.59E-05 |
| CLCN2     | 1.069244186  | 3.97640147   | 4.181852423  | 4.59E-05 |
| P2RY6     | 1.700992213  | 2.286142383  | 4.179384501  | 4.64E-05 |
| C11orf80  | 1.05413736   | 4.074914158  | 4.178232987  | 4.66E-05 |
| SYCP3     | -1.857609752 | -0.477975425 | -4.176631688 | 4.69E-05 |
| GNAZ      | -2.013031943 | 1.922081341  | -4.175711472 | 4.71E-05 |
| PITPNC1   | -1.162720814 | 4.424189711  | -4.174961015 | 4.72E-05 |
| IFITM1    | 1.613644741  | 6.103513392  | 4.174359002  | 4.73E-05 |
| PLEKHG5   | 1.186170098  | 5.462161166  | 4.173984392  | 4.74E-05 |
| SLC25A34  | -1.404965113 | 0.588523661  | -4.172238949 | 4.77E-05 |
| CCL3      | 1.883354581  | 0.515596446  | 4.170810211  | 4.80E-05 |
| RPS6KA6   | -2.917182256 | -0.49576646  | -4.170524962 | 4.80E-05 |
| TRIP6     | 1.286018936  | 5.67091019   | 4.169440344  | 4.83E-05 |
| FHIT      | -1.576528737 | 1.558785028  | -4.169414149 | 4.83E-05 |
| LARGE1    | -1.408575983 | 4.266663554  | -4.166472191 | 4.88E-05 |
| FAM83B    | 1.795157136  | 4.960709592  | 4.165153773  | 4.91E-05 |
| PARP14    | 1.011754638  | 7.251912946  | 4.159173755  | 5.03E-05 |
| ANKRD13B  | 1.313619147  | 3.919233987  | 4.1493876    | 5.23E-05 |
| ATP8B1    | -1.327260641 | 6.79254174   | -4.149382421 | 5.23E-05 |
| GAD1      | 2.437820438  | 0.97918755   | 4.143855332  | 5.34E-05 |
| PARD3B    | -1.708051553 | 3.574185583  | -4.142426147 | 5.37E-05 |

|          |              |              |              |          |
|----------|--------------|--------------|--------------|----------|
| RAP1GAP  | -2.019652975 | 4.727834523  | -4.139344824 | 5.44E-05 |
| C21orf58 | 1.09595326   | 2.880527599  | 4.134584315  | 5.54E-05 |
| USP18    | 1.208076796  | 2.669471549  | 4.130962593  | 5.62E-05 |
| GIN3     | 1.028676969  | 3.344490782  | 4.130251261  | 5.64E-05 |
| TNFSF10  | 1.64238982   | 6.465530184  | 4.130249446  | 5.64E-05 |
| FOLR1    | -3.576729808 | -0.527244966 | -4.129111306 | 5.66E-05 |
| EVA1A    | 2.290860356  | 1.103854167  | 4.128251138  | 5.68E-05 |
| HERPUD1  | -1.0201356   | 6.534066355  | -4.127797799 | 5.69E-05 |
| MMP13    | 3.970166607  | 1.447654179  | 4.124239997  | 5.77E-05 |
| ITGB8    | 1.439212403  | 6.511368222  | 4.122831468  | 5.81E-05 |
| CILP2    | 2.222073624  | 0.74889112   | 4.121768387  | 5.83E-05 |
| STX1A    | 1.302058305  | 3.259479534  | 4.121579107  | 5.83E-05 |
| SH2D5    | 2.693080233  | 0.515792273  | 4.120428591  | 5.86E-05 |
| GSN      | -1.199320129 | 8.555470321  | -4.120323101 | 5.86E-05 |
| FAM83A   | 3.997390301  | 4.722813278  | 4.119395307  | 5.89E-05 |
| FJX1     | 1.677738788  | 3.292297289  | 4.119364308  | 5.89E-05 |
| CYP27B1  | 1.431002349  | 1.852213186  | 4.111798532  | 6.06E-05 |
| SCN3A    | -2.105312696 | -0.233280755 | -4.111104279 | 6.08E-05 |
| ANKDD1A  | -1.064787425 | 1.937455579  | -4.110045245 | 6.11E-05 |
| TGFBR3   | -1.892039082 | 4.375810706  | -4.109947002 | 6.11E-05 |
| SULF2    | 1.429228524  | 7.454948788  | 4.107190279  | 6.18E-05 |
| CPNE2    | 1.08781719   | 5.0502024    | 4.103975803  | 6.25E-05 |
| NFIA     | -1.085494496 | 6.229861542  | -4.103099595 | 6.28E-05 |
| MMRN1    | -2.614266961 | 1.374762855  | -4.100260495 | 6.35E-05 |
| TCEAL2   | -2.812299122 | -1.577153476 | -4.09968198  | 6.36E-05 |
| CABP1    | -1.687607434 | -0.498412341 | -4.09945153  | 6.37E-05 |
| DUSP2    | 1.441481689  | 2.74821309   | 4.094367244  | 6.50E-05 |
| DAAM2    | -1.861891114 | 3.453167901  | -4.092969405 | 6.53E-05 |
| GALNT16  | -2.197987174 | 0.005207961  | -4.090492578 | 6.60E-05 |
| PLEK2    | 1.765735874  | 4.643365259  | 4.090181752  | 6.60E-05 |
| CGAS     | 1.544234464  | 4.034380947  | 4.087681659  | 6.67E-05 |
| ZIC5     | 3.174383397  | 0.776037179  | 4.087309322  | 6.68E-05 |
| GRIN2A   | -2.739004353 | -0.248692868 | -4.08641197  | 6.70E-05 |
| PRR19    | 1.284376923  | 0.398378969  | 4.082817498  | 6.80E-05 |
| RAB42    | 1.290270328  | 0.79076688   | 4.082703825  | 6.80E-05 |
| CPED1    | -1.912417189 | 2.68006934   | -4.080202944 | 6.87E-05 |
| RELN     | -2.60881102  | -0.257223006 | -4.079072927 | 6.90E-05 |
| RAB3C    | -2.746569531 | -0.476328223 | -4.077168386 | 6.95E-05 |
| CXCL10   | 2.715565471  | 3.387770476  | 4.074777606  | 7.01E-05 |
| WLS      | -1.009024735 | 5.903576356  | -4.074439439 | 7.02E-05 |
| NTRK3    | -2.600004298 | -1.122617129 | -4.072180577 | 7.09E-05 |
| ZNF429   | -1.862545979 | 1.68984127   | -4.071897529 | 7.09E-05 |
| SCARB1   | 1.183333377  | 5.585390671  | 4.069783999  | 7.15E-05 |
| CHRNA7   | -2.192979588 | -0.279777722 | -4.069731124 | 7.15E-05 |
| FLVCR2   | 1.442918683  | 2.313292236  | 4.067759772  | 7.21E-05 |
| LAMB3    | 1.637320214  | 8.367132176  | 4.065645858  | 7.27E-05 |
| MAOA     | -1.791217738 | 5.870643708  | -4.065458048 | 7.28E-05 |
| GCNT2    | -1.913022636 | 3.277330429  | -4.063221254 | 7.34E-05 |
| CTLA4    | 1.740469151  | 0.996153253  | 4.061556099  | 7.39E-05 |
| CCN5     | -2.807994158 | -0.059791322 | -4.05976229  | 7.44E-05 |
| KANK3    | -1.275603148 | 1.78117094   | -4.058026912 | 7.49E-05 |
| TTR      | -3.331258027 | -2.332545033 | -4.056232664 | 7.54E-05 |
| LIPG     | 2.029645661  | 3.876508791  | 4.055724462  | 7.56E-05 |

|          |              |              |              |             |
|----------|--------------|--------------|--------------|-------------|
| MOCS1    | -1.205424943 | 2.910575235  | -4.054553465 | 7.59E-05    |
| JAM2     | -1.672997709 | 2.503585031  | -4.053840981 | 7.61E-05    |
| ADAMDEC1 | 2.141714652  | 1.60685292   | 4.051228284  | 7.69E-05    |
| SIX1     | 2.321678618  | 1.947311049  | 4.049963445  | 7.73E-05    |
| ARSD     | -1.341786516 | 5.365902184  | -4.049348116 | 7.75E-05    |
| H2BC12   | 1.469974668  | 4.253007924  | 4.047822061  | 7.79E-05    |
| ENPEP    | 1.430468754  | 2.867375987  | 4.04153448   | 7.99E-05    |
| PSMD3    | 1.010919188  | 7.236488719  | 4.040887835  | 8.01E-05    |
| NR3C2    | -2.504321008 | 2.312057535  | -4.040695351 | 8.01E-05    |
| ZNF763   | -1.358789716 | -0.302683181 | -4.039446516 | 8.05E-05    |
| HPN      | -3.623739211 | -0.444499574 | -4.038717794 | 8.08E-05    |
| LIMD2    | 1.267971362  | 3.585908332  | 4.036521105  | 8.14E-05    |
| NPR1     | -1.549738845 | 2.017513891  | -4.035906553 | 8.16E-05    |
| FGA      | -3.845074382 | -2.016564922 | -4.030238031 | 8.35E-05    |
| SLC4A4   | -3.542631286 | 2.099466634  | -4.02756938  | 8.43E-05    |
| RORC     | -3.172678528 | 1.733154615  | -4.026286447 | 8.48E-05    |
| ZNF425   | -1.159671047 | 1.034016264  | -4.021842565 | 8.62E-05    |
| PNPLA1   | -2.163321061 | -0.757735133 | -4.018044629 | 8.75E-05    |
| AHCYL2   | -1.492016888 | 5.480142613  | -4.016140154 | 8.82E-05    |
| TRPM2    | 1.231210973  | 3.287593978  | 4.01592944   | 8.82E-05    |
| HOXB9    | 3.25987323   | 1.806479033  | 4.015295901  | 8.84E-05    |
| PKP3     | 1.475092441  | 7.517304078  | 4.013701527  | 8.90E-05    |
| REPS2    | -2.04900977  | 3.737053714  | -4.013690911 | 8.90E-05    |
| TFF2     | -5.317521375 | 0.613021371  | -4.012666265 | 8.93E-05    |
| RTKN2    | 1.557097714  | 3.300202678  | 4.010700306  | 9.00E-05    |
| HENMT1   | 1.54836643   | 2.919249497  | 4.005523475  | 9.19E-05    |
| PAK3     | -2.588149611 | -0.319286468 | -4.004423548 | 9.22E-05    |
| ITM2A    | -1.747698069 | 2.529520225  | -4.003705704 | 9.25E-05    |
| CDNF     | -1.193973504 | -0.268831222 | -4.001524484 | 9.33E-05    |
| AJUBA    | 1.365033656  | 5.343356996  | 4.001288105  | 9.34E-05    |
| ITGA9    | -1.796726394 | 3.393478433  | -3.995569967 | 9.55E-05    |
| MAPK15   | 1.701154397  | 2.141072771  | 3.994889707  | 9.57E-05    |
| TNFSF11  | 1.885324336  | -0.176700226 | 3.993494176  | 9.62E-05    |
| PPP1R36  | -2.051665531 | -0.041360924 | -3.992225105 | 9.67E-05    |
| C18orf54 | 1.187679288  | 2.703082842  | 3.992081537  | 9.68E-05    |
| REEP1    | -2.06076133  | 1.938741956  | -3.991829368 | 9.68E-05    |
| CD83     | 1.241125354  | 3.056554479  | 3.991314537  | 9.70E-05    |
| FCER1G   | 1.62446112   | 4.503934574  | 3.989535372  | 9.77E-05    |
| CDH2     | -2.657877485 | 0.90792793   | -3.987646385 | 9.84E-05    |
| COL24A1  | 1.946957685  | 0.951618098  | 3.985814247  | 9.91E-05    |
| ZNF493   | -1.801898567 | 2.638830445  | -3.985249069 | 9.93E-05    |
| TWIST1   | 1.976682365  | 1.947860038  | 3.982703683  | 0.000100313 |
| GALNT12  | -1.628616886 | 4.22238443   | -3.980482755 | 0.000101175 |
| RSPO2    | -2.457929964 | -1.620913228 | -3.976573967 | 0.000102708 |
| WNK4     | -2.70412887  | 1.715307397  | -3.97625074  | 0.000102836 |
| ELL2     | -1.362879262 | 6.168439766  | -3.97517403  | 0.000103263 |
| GPR176   | 1.769545401  | 3.093632378  | 3.974181266  | 0.000103658 |
| POGLUT2  | 1.001096476  | 2.335838163  | 3.973041532  | 0.000104114 |
| DMD      | -1.878474204 | 3.719894963  | -3.971041959 | 0.000104917 |
| PDE4D    | -1.120239469 | 4.477987874  | -3.968831219 | 0.000105813 |
| TNFRSF9  | 1.564115277  | 1.507386867  | 3.967627273  | 0.000106303 |
| TMPRSS13 | 2.931128654  | 2.78619816   | 3.96592629   | 0.000107    |
| HPSE     | 1.252784539  | 3.773737287  | 3.965067914  | 0.000107354 |

|          |              |              |              |             |
|----------|--------------|--------------|--------------|-------------|
| NOSTRIN  | -2.094304731 | 2.716785121  | -3.964723433 | 0.000107496 |
| PPM1K    | -1.126730653 | 3.831685167  | -3.963874977 | 0.000107846 |
| THSD4    | -1.7429186   | 4.886802253  | -3.963464684 | 0.000108016 |
| COL5A3   | 1.713056391  | 4.972891946  | 3.96106564   | 0.000109016 |
| SP8      | 2.796782844  | -1.57762564  | 3.955208273  | 0.000111492 |
| METTTL27 | 1.679240238  | 1.36513015   | 3.951125248  | 0.00011325  |
| CAVIN2   | -1.825698111 | 3.281977817  | -3.951082059 | 0.000113269 |
| TUBB3    | 1.780692924  | 0.741845402  | 3.946600093  | 0.00011523  |
| DKK2     | 1.877659121  | 0.332592875  | 3.942555433  | 0.000117026 |
| ACSM3    | -2.537075333 | 1.949269457  | -3.940864292 | 0.000117786 |
| TMEM158  | 1.780539265  | 3.982375351  | 3.940618718  | 0.000117896 |
| CD86     | 1.592404385  | 2.499822122  | 3.937373677  | 0.000119367 |
| MT1X     | -1.752162031 | 4.928907453  | -3.936770233 | 0.000119643 |
| CPXM1    | 1.949771904  | 2.99054989   | 3.93621786   | 0.000119896 |
| LAD1     | 1.378083529  | 8.178793882  | 3.934735521  | 0.000120576 |
| PHLDA2   | 1.511796061  | 5.505074608  | 3.929206419  | 0.000123148 |
| GSTA2    | -2.816473134 | -2.305911398 | -3.928000188 | 0.000123716 |
| DISP1    | -1.237173404 | 2.783825297  | -3.926944955 | 0.000124214 |
| ZNF483   | -1.640841776 | 0.294775974  | -3.926860033 | 0.000124255 |
| PLCE1    | -1.412346771 | 4.300802199  | -3.925089065 | 0.000125096 |
| MOV10L1  | 1.719276014  | -0.75725629  | 3.923830089  | 0.000125698 |
| FRY      | -1.53103324  | 3.920676547  | -3.921138036 | 0.000126994 |
| RAET1L   | 2.929373438  | 1.634305566  | 3.917834451  | 0.000128601 |
| DUSP14   | 1.168232794  | 4.587766271  | 3.917711192  | 0.000128662 |
| DSCAML1  | -2.126910213 | -1.470097086 | -3.916799163 | 0.000129109 |
| ALG1L    | 2.005458779  | 1.606938315  | 3.915854074  | 0.000129574 |
| OAS2     | 1.528961508  | 6.772758206  | 3.914103341  | 0.00013044  |
| MT1F     | -1.690642374 | 2.81505658   | -3.911007061 | 0.000131985 |
| FSCN1    | 2.411174263  | 7.725675684  | 3.910191109  | 0.000132395 |
| CSRNP1   | -1.109474323 | 5.080929151  | -3.908620173 | 0.000133188 |
| NOTCH1   | 1.026934345  | 7.359980323  | 3.906256503  | 0.000134389 |
| KCNQ1    | -2.453138579 | 4.291431532  | -3.896478901 | 0.000139469 |
| PLEKHG4  | 1.430348812  | 4.694695192  | 3.895508154  | 0.000139983 |
| PLP2     | 1.081362434  | 7.736990923  | 3.895477365  | 0.00014     |
| KALRN    | -1.651575932 | 4.438143939  | -3.894354016 | 0.000140597 |
| BCL2A1   | 1.613824157  | 1.433650736  | 3.893848536  | 0.000140867 |
| SAA2     | 2.987543883  | 1.337085677  | 3.893254337  | 0.000141184 |
| KREMEN2  | 2.557189555  | 1.690227374  | 3.890593589  | 0.000142614 |
| LPCAT1   | 1.099316521  | 5.930289978  | 3.889441042  | 0.000143238 |
| SLC2A6   | 1.286295393  | 2.45384536   | 3.889168261  | 0.000143386 |
| XXYLT1   | 1.024663236  | 4.800100867  | 3.88721143   | 0.000144452 |
| TOX      | -1.963321352 | 2.324757182  | -3.886833453 | 0.000144659 |
| IGFBP2   | -2.181175701 | 6.412860731  | -3.886648732 | 0.00014476  |
| CCDC74A  | 1.439653522  | 1.775920239  | 3.885612932  | 0.000145329 |
| PTGES    | 1.875813074  | 3.660302245  | 3.885216412  | 0.000145547 |
| CRYL1    | -1.309592331 | 3.864575546  | -3.883294585 | 0.000146609 |
| PCED1B   | 1.30123249   | 2.617827716  | 3.883014601  | 0.000146764 |
| SMKR1    | 1.750867442  | -0.380940189 | 3.882365431  | 0.000147125 |
| REEP4    | 1.043809838  | 5.544696249  | 3.880501231  | 0.000148165 |
| PON2     | 1.140506913  | 5.834369886  | 3.880271293  | 0.000148294 |
| CNKSR2   | -2.524196223 | -1.291201757 | -3.879819844 | 0.000148547 |
| IL33     | -2.486853778 | 2.718143528  | -3.87951007  | 0.000148721 |
| OGN      | -2.503248346 | 1.61475918   | -3.879505521 | 0.000148724 |

|          |              |              |              |             |
|----------|--------------|--------------|--------------|-------------|
| RGS1     | 1.889149446  | 4.747770686  | 3.878429568  | 0.00014933  |
| GCOM1    | -2.276424858 | -0.140649986 | -3.876772236 | 0.000150267 |
| CCT6B    | -1.151391582 | 0.617523434  | -3.876058624 | 0.000150673 |
| CIB2     | 1.380297855  | 2.385451544  | 3.87166176   | 0.000153195 |
| PIFO     | -2.179509455 | -0.326142292 | -3.870979506 | 0.00015359  |
| MASP2    | -1.303761699 | 0.482528956  | -3.869200966 | 0.000154624 |
| EIF4E3   | -1.105778353 | 4.376044546  | -3.868575817 | 0.000154989 |
| ARRDC4   | -1.558014869 | 4.935429786  | -3.867226757 | 0.000155779 |
| PPP1R12B | -1.578339773 | 6.066773846  | -3.867176718 | 0.000155808 |
| AIFM3    | 1.395816559  | 0.544835989  | 3.864088621  | 0.000157632 |
| ICOS     | 1.702763072  | 0.428666397  | 3.862716578  | 0.000158449 |
| SNTB1    | -1.738742349 | 4.099575569  | -3.862225028 | 0.000158743 |
| CCL4L2   | 1.892042179  | 0.842596266  | 3.859349051  | 0.000160471 |
| GBP1     | 1.541036416  | 5.752201469  | 3.859116099  | 0.000160612 |
| LAMA2    | -1.777241967 | 3.858580825  | -3.858394913 | 0.000161049 |
| LYRM9    | -1.190680914 | 1.165920449  | -3.857273458 | 0.00016173  |
| RDM1     | 1.584330686  | -0.478970898 | 3.856445166  | 0.000162235 |
| ARHGEF9  | -1.198305289 | 3.932960663  | -3.853609099 | 0.000163975 |
| CD276    | 1.055564954  | 6.521307541  | 3.85280284   | 0.000164473 |
| KIAA0895 | -1.170241192 | 3.662143638  | -3.851398019 | 0.000165343 |
| ACO1     | -1.023729589 | 5.535746901  | -3.846253787 | 0.00016857  |
| SAMD13   | -1.908082086 | -0.255525661 | -3.843387087 | 0.000170394 |
| DNAH3    | 1.460321206  | 1.29951005   | 3.842591621  | 0.000170903 |
| MAP6D1   | 1.007155396  | 1.688420437  | 3.842536874  | 0.000170938 |
| EDA      | -1.823546037 | 1.687018381  | -3.841274634 | 0.00017175  |
| PRAME    | 4.035201738  | 1.607546905  | 3.840837144  | 0.000172032 |
| CACNB2   | -1.565871879 | 1.574222998  | -3.840100882 | 0.000172508 |
| GPR17    | -1.829155906 | -0.88159368  | -3.839567025 | 0.000172853 |
| GAS2     | -2.256782366 | -0.578100589 | -3.837704266 | 0.000174065 |
| H3C8     | 2.003031523  | 0.076354376  | 3.835079325  | 0.000175786 |
| WDR72    | 2.757207596  | 4.615635489  | 3.831597551  | 0.000178094 |
| GALNT10  | -1.079511148 | 5.776821942  | -3.830663857 | 0.000178717 |
| TNNT1    | 3.040189152  | 1.22566045   | 3.827003918  | 0.000181182 |
| SPOCD1   | 1.622842348  | 1.58861279   | 3.82619228   | 0.000181733 |
| RFX6     | -2.690030499 | -2.573159932 | -3.822045947 | 0.000184572 |
| BMERB1   | -1.226535178 | 2.802343656  | -3.813777868 | 0.000190361 |
| NFKBIE   | 1.130721966  | 3.992641787  | 3.812821961  | 0.000191041 |
| SEMA5B   | 1.567738142  | 1.093417606  | 3.812016407  | 0.000191616 |
| ACKR1    | -2.855473603 | 1.948642076  | -3.809763936 | 0.000193232 |
| CAPG     | 1.021538518  | 6.375368519  | 3.808156038  | 0.000194394 |
| TDRD9    | -1.898546628 | -1.264808064 | -3.806870588 | 0.000195327 |
| PAIP2B   | -2.105615087 | 2.391189439  | -3.805865885 | 0.00019606  |
| SPRED3   | 1.105893202  | 1.517808637  | 3.804451397  | 0.000197096 |
| SYTL3    | -1.132759975 | 2.177615384  | -3.802012707 | 0.000198894 |
| TRMT9B   | -2.289999408 | 0.771629588  | -3.801713072 | 0.000199116 |
| LTBP4    | -1.098065002 | 7.539496205  | -3.798447793 | 0.000201551 |
| DCLK2    | -1.40422458  | 1.078091084  | -3.797656382 | 0.000202145 |
| SATB1    | -1.138066981 | 4.431997069  | -3.796989639 | 0.000202647 |
| WNK3     | -1.738657551 | 0.028545514  | -3.79582533  | 0.000203526 |
| RBM20    | -2.000639066 | -0.286533978 | -3.79212749  | 0.000206343 |
| RAP2B    | 1.027096625  | 6.033299306  | 3.788970654  | 0.000208777 |
| SNAPC1   | 1.128598312  | 3.274893964  | 3.787227166  | 0.000210133 |
| ITGA10   | -1.205168116 | 0.908590213  | -3.786317815 | 0.000210844 |



|           |              |              |              |             |
|-----------|--------------|--------------|--------------|-------------|
| PTPRN     | -2.545459627 | -1.029186107 | -3.783368802 | 0.000213163 |
| WSCD1     | -1.882851398 | 0.120233769  | -3.782999737 | 0.000213455 |
| C6orf223  | 2.950621851  | 1.348448571  | 3.781949188  | 0.000214289 |
| PKIB      | -2.045559199 | 1.631982866  | -3.780505287 | 0.000215439 |
| NRARP     | 1.248389346  | 5.79314681   | 3.776471309  | 0.000218684 |
| F2R       | 1.287599475  | 5.530741832  | 3.77080558   | 0.00022332  |
| AMACR     | -1.216776126 | 2.123084877  | -3.770741601 | 0.000223373 |
| FCGR2A    | 1.572885675  | 4.403007359  | 3.769494611  | 0.000224406 |
| UPP1      | 1.465895224  | 5.005892071  | 3.763925047  | 0.000229075 |
| ZNF415    | -1.74609887  | 0.427135464  | -3.7587399   | 0.000233504 |
| NMB       | 1.370106672  | 3.065490935  | 3.751416908  | 0.000239898 |
| MECOM     | -1.955898736 | 5.507734582  | -3.750570871 | 0.000240647 |
| RAB9B     | -1.83305614  | -0.01947367  | -3.749194043 | 0.000241872 |
| SAA1      | 2.843288818  | 3.380758777  | 3.747517178  | 0.00024337  |
| COL27A1   | 1.356359021  | 5.697777794  | 3.746932708  | 0.000243895 |
| PRSS1     | -3.316020336 | -1.831827754 | -3.746291153 | 0.000244472 |
| NAT14     | 1.010912869  | 2.438050612  | 3.746070044  | 0.000244671 |
| CACFD1    | -1.071765336 | 4.239659039  | -3.745965283 | 0.000244765 |
| DMC1      | 1.446026734  | 0.038471838  | 3.744957577  | 0.000245675 |
| BEND5     | -1.771163274 | -0.677892672 | -3.742783181 | 0.000247649 |
| TNS1      | -1.681335391 | 7.143392055  | -3.742053376 | 0.000248315 |
| SYTL4     | -1.055779935 | 3.307104612  | -3.741722787 | 0.000248618 |
| IER5      | 1.19352949   | 5.419368747  | 3.741282915  | 0.00024902  |
| TLCD1     | 1.028617717  | 3.295887406  | 3.739705111  | 0.00025047  |
| MTARC2    | -1.430822132 | 2.981430994  | -3.73925136  | 0.000250888 |
| VDR       | 1.116170523  | 5.627411584  | 3.738994359  | 0.000251125 |
| TNFRSF12A | 1.302376498  | 5.471386375  | 3.73714131   | 0.000252842 |
| SFN       | 2.413337014  | 8.420033303  | 3.735600341  | 0.000254278 |
| SOCS2     | -1.318059731 | 3.359264007  | -3.733105092 | 0.00025662  |
| NABP1     | 1.040654326  | 4.739049531  | 3.73284375   | 0.000256866 |
| ALDH3B2   | 3.378371308  | 4.121451996  | 3.731482271  | 0.000258154 |
| PPP1R18   | 1.058215745  | 5.85874293   | 3.729674594  | 0.000259872 |
| RIC3      | -2.378391496 | -0.110337316 | -3.72931446  | 0.000260216 |
| GJA3      | 2.763544831  | 1.364525589  | 3.729210866  | 0.000260315 |
| NKD2      | 1.977107647  | 2.742451076  | 3.720281401  | 0.00026898  |
| SSC4D     | 1.260242051  | 0.434753402  | 3.719394073  | 0.000269855 |
| JUP       | 1.561602827  | 10.72277851  | 3.716784342  | 0.000272447 |
| FNIP2     | -1.032755966 | 5.488387343  | -3.712737335 | 0.000276512 |
| MAOB      | -2.293880449 | 3.141102526  | -3.706762107 | 0.000282618 |
| PTGER2    | -2.189300475 | 1.541916903  | -3.706221273 | 0.000283177 |
| AKAP3     | -1.348127277 | -0.367010341 | -3.702945245 | 0.000286586 |
| ISL1      | -2.825142369 | -1.13144573  | -3.700363195 | 0.000289299 |
| GABRA3    | 3.299120279  | 0.387185165  | 3.700335414  | 0.000289329 |
| RUNX3     | 1.624541463  | 4.514146116  | 3.698913357  | 0.000290834 |
| SPON2     | 1.210180895  | 5.208060198  | 3.695733927  | 0.000294225 |
| CTH       | -1.516985497 | 1.647563912  | -3.695539776 | 0.000294434 |
| TGFBR2    | -1.250226766 | 6.702335229  | -3.693267436 | 0.000296882 |
| H4C9      | 1.384577612  | 3.518525447  | 3.690603491  | 0.000299777 |
| IL24      | 1.825764599  | 1.295436502  | 3.68843758   | 0.000302151 |
| SCUBE1    | -2.240744336 | 1.593362932  | -3.688106031 | 0.000302516 |
| CXCL17    | -3.392042083 | 3.458686207  | -3.687645155 | 0.000303023 |
| CPQ       | -1.289250982 | 3.557217894  | -3.684809611 | 0.000306166 |
| ANXA2     | 1.039235032  | 9.821411109  | 3.683544568  | 0.000307578 |

|          |              |              |              |             |
|----------|--------------|--------------|--------------|-------------|
| COL1A2   | 1.787029298  | 10.07002039  | 3.682196173  | 0.00030909  |
| ADAM28   | -2.239635117 | 3.675019748  | -3.681545026 | 0.000309822 |
| POTEF    | 1.29057026   | 0.458770489  | 3.67346835   | 0.000319046 |
| TENT5C   | -1.999608665 | 3.596123278  | -3.673082677 | 0.000319493 |
| CNTFR    | -2.530793514 | -0.712599486 | -3.672626583 | 0.000320022 |
| KLHDC7A  | -3.108341605 | 0.190165079  | -3.67253236  | 0.000320131 |
| ITGAX    | 1.4887981    | 3.667204337  | 3.670723249  | 0.000322239 |
| ADAM8    | 1.571514451  | 4.43840433   | 3.66911632   | 0.000324123 |
| TRIM29   | 3.174620845  | 7.765111053  | 3.667490723  | 0.000326039 |
| TFR2     | -1.84781283  | 2.171208085  | -3.666220708 | 0.000327543 |
| ANXA10   | -3.899933112 | 1.9951369    | -3.663353937 | 0.000330962 |
| STEAP1   | 1.289483898  | 4.032631076  | 3.658561886  | 0.000336754 |
| NAGS     | 1.336694331  | 1.915882658  | 3.657762179  | 0.000337729 |
| TCF21    | -1.571073679 | 0.988777807  | -3.651864033 | 0.000345009 |
| MAPT     | -1.977402412 | 0.706329298  | -3.649791275 | 0.000347602 |
| SSTR1    | -3.868495483 | 0.65034423   | -3.648473142 | 0.000349261 |
| DUSP9    | 2.849569562  | 0.450536066  | 3.646148278  | 0.000352204 |
| BTG2     | -1.215686464 | 6.537863198  | -3.645632082 | 0.000352861 |
| MICU3    | -1.676637408 | 0.606282538  | -3.645086995 | 0.000353556 |
| HYAL1    | -1.818894274 | 2.983616152  | -3.644026345 | 0.000354911 |
| MAGIX    | -1.384275966 | 1.808298395  | -3.641415672 | 0.000358269 |
| SYBU     | -2.33371185  | 3.044455487  | -3.638674004 | 0.000361827 |
| SHOX2    | 2.187899852  | 0.560093586  | 3.63722801   | 0.000363717 |
| SCNN1G   | -3.034001425 | 0.449798322  | -3.63683747  | 0.000364229 |
| QSOX1    | -1.0142241   | 7.917255979  | -3.635583924 | 0.000365877 |
| CHRM3    | -1.680693773 | 3.812993286  | -3.634834402 | 0.000366866 |
| PODNL1   | 1.662499128  | 2.610363111  | 3.634623284  | 0.000367145 |
| LMOD1    | -2.338481857 | 3.795632965  | -3.634220909 | 0.000367677 |
| RCN3     | 1.373689996  | 4.159639274  | 3.629730737  | 0.000373667 |
| FAM177B  | -1.947074947 | 0.838100796  | -3.627429705 | 0.000376772 |
| TGFB1    | 1.85467886   | 7.345511646  | 3.62708297   | 0.000377242 |
| SCD      | 1.386770823  | 8.103497696  | 3.624386314  | 0.000380916 |
| PPP1R9A  | -3.052493434 | 1.556363259  | -3.623485992 | 0.00038215  |
| RNASE4   | -1.718796142 | 0.444084268  | -3.617315713 | 0.000390709 |
| IFI35    | 1.016059005  | 4.484368035  | 3.617263427  | 0.000390783 |
| CD68     | 1.121786527  | 1.357829709  | 3.616428062  | 0.000391956 |
| CYP4B1   | -2.835746324 | -0.036593919 | -3.615887486 | 0.000392716 |
| ZBED3    | -1.333639304 | 3.982992205  | -3.613322828 | 0.000396345 |
| RAI14    | 1.059497794  | 6.206981477  | 3.611681321  | 0.000398683 |
| MS4A2    | -1.928891981 | -0.146324966 | -3.611152109 | 0.00039944  |
| IL32     | 1.604985295  | 5.636607526  | 3.60842693   | 0.000403359 |
| FAM107B  | -1.583906187 | 5.600004342  | -3.605589392 | 0.000407477 |
| TIMP4    | -1.714608132 | -0.371280143 | -3.60172016  | 0.000413157 |
| SULF1    | 1.799050292  | 6.403651742  | 3.597803684  | 0.000418982 |
| GRAMD1C  | -1.231584181 | 3.012282328  | -3.59639147  | 0.000421102 |
| CASQ2    | -2.565611575 | 0.013210859  | -3.595454629 | 0.000422513 |
| HMGN5    | -1.609224844 | 2.173998006  | -3.593553465 | 0.000425392 |
| CNTD2    | 1.833464875  | -0.312947827 | 3.593009707  | 0.000426218 |
| SH3BGR12 | -2.297634526 | 5.399743289  | -3.592059255 | 0.000427667 |
| IFIT3    | 1.552937106  | 4.94374223   | 3.590511135  | 0.000430036 |
| CDCP1    | 1.011929428  | 7.232379025  | 3.588839863  | 0.000432607 |
| CNR1     | -2.42264727  | -0.58980714  | -3.588590764 | 0.000432992 |
| HOXA13   | 3.124597661  | 1.8765378    | 3.586866577  | 0.000435662 |

|           |              |              |              |             |
|-----------|--------------|--------------|--------------|-------------|
| ETV7      | 1.313439349  | 3.178587783  | 3.584604622  | 0.000439189 |
| RUNX2     | 1.314170065  | 3.745722936  | 3.582233419  | 0.000442915 |
| FAM47E    | -1.839239426 | 0.0247819    | -3.579313231 | 0.000447544 |
| ODF3B     | 1.008465115  | 4.131687484  | 3.574410406  | 0.00045542  |
| RYR3      | -1.363853786 | 1.185959233  | -3.574136788 | 0.000455863 |
| TSPAN12   | -1.846368086 | 2.708720293  | -3.573217673 | 0.000457355 |
| SASH1     | -1.194986536 | 5.311349927  | -3.572913109 | 0.000457851 |
| UBE2L6    | 1.098573203  | 5.94313165   | 3.568644386  | 0.000464848 |
| SOWAHA    | -2.620357599 | 0.982271121  | -3.567041581 | 0.000467502 |
| TMEM238L  | -3.345890766 | 0.01672601   | -3.566945784 | 0.000467661 |
| LBX2      | 1.170399174  | 0.186476373  | 3.56641112   | 0.000468549 |
| ABCA9     | -1.935372987 | 0.607688023  | -3.564154562 | 0.000472317 |
| ZNF677    | -1.580939378 | 0.934313485  | -3.563870201 | 0.000472794 |
| TMEFF2    | -2.025912614 | -2.538724303 | -3.563607652 | 0.000473234 |
| PXDN      | 1.437176576  | 6.29034616   | 3.561633545  | 0.00047656  |
| GSTP1     | 1.156470283  | 9.064054383  | 3.56124481   | 0.000477217 |
| PLK2      | 1.146630298  | 5.244311294  | 3.560418583  | 0.000478618 |
| ABCA2     | -1.24320256  | 5.938587313  | -3.560171954 | 0.000479036 |
| ZSCAN18   | -1.762993758 | 2.268750925  | -3.559575852 | 0.00048005  |
| WDR66     | 2.172886624  | 3.29019231   | 3.559541143  | 0.000480109 |
| CAPN6     | -3.25516053  | 0.907596595  | -3.559494538 | 0.000480188 |
| PLOD3     | 1.102362583  | 6.578324836  | 3.557539747  | 0.000483527 |
| ZIC2      | 2.74268251   | 1.658798081  | 3.557312047  | 0.000483917 |
| COL5A1    | 1.728955144  | 7.81148207   | 3.55695873   | 0.000484523 |
| ANO5      | -2.554715484 | 1.194414286  | -3.554938494 | 0.000488003 |
| SOBP      | -1.533184246 | 2.668894203  | -3.552482253 | 0.000492265 |
| HES2      | 2.899139129  | 3.546842758  | 3.551597495  | 0.000493809 |
| ADCY6     | -1.290163471 | 4.978068432  | -3.550382296 | 0.000495937 |
| SLC9A3    | -2.967364325 | 3.628965085  | -3.548952795 | 0.000498452 |
| MPZ       | -1.428529012 | 0.095664232  | -3.548009021 | 0.000500118 |
| ABLIM1    | -1.243880479 | 7.911407776  | -3.546553303 | 0.000502699 |
| PAQR5     | -1.659410126 | 3.305255799  | -3.545748416 | 0.000504131 |
| KIAA1211L | -1.641495715 | 3.428937767  | -3.545232634 | 0.000505051 |
| MYOM1     | -1.859451046 | 1.644684801  | -3.544835356 | 0.000505761 |
| STS       | -1.374361641 | 4.176645777  | -3.544692396 | 0.000506017 |
| COL3A1    | 1.764455969  | 10.09337634  | 3.544482191  | 0.000506393 |
| LINGO1    | 1.458625104  | 2.014601308  | 3.544379952  | 0.000506576 |
| SLAIN1    | -2.163794268 | 1.384512796  | -3.543001769 | 0.000509048 |
| SPHK1     | 1.600768693  | 4.569503111  | 3.542120921  | 0.000510635 |
| MTRNR2L1  | -1.262074637 | 0.529792462  | -3.541483085 | 0.000511786 |
| ADAMTSL3  | -2.007485994 | 1.335458054  | -3.539321501 | 0.000515707 |
| TIMP1     | 1.257440675  | 7.58656021   | 3.538956859  | 0.000516371 |
| ZNF135    | -1.665930649 | 0.011230335  | -3.537754399 | 0.000518567 |
| LGALS1    | 1.430383592  | 6.644383641  | 3.537141195  | 0.000519691 |
| SEMA3G    | -1.365487941 | 2.314221457  | -3.536502401 | 0.000520863 |
| C2        | 1.54130029   | 3.994410367  | 3.536255562  | 0.000521317 |
| ABCA6     | -1.81705089  | 1.112806605  | -3.535035398 | 0.000523565 |
| APLN      | 1.826217725  | 2.276320527  | 3.532810466  | 0.000527689 |
| NECAB1    | -1.857752738 | 0.381271906  | -3.532724006 | 0.00052785  |
| CA2       | -2.370316998 | 5.314591052  | -3.532219786 | 0.000528789 |
| ZFYVE28   | -1.137105805 | 3.188686882  | -3.530783654 | 0.000531472 |
| WASF3     | -1.848203464 | 2.132822296  | -3.529957505 | 0.000533021 |
| EGFL6     | 1.355208514  | 2.999007477  | 3.529842416  | 0.000533237 |

|          |              |              |              |             |
|----------|--------------|--------------|--------------|-------------|
| GJB2     | 2.618559089  | 6.992906436  | 3.525076274  | 0.000542261 |
| C1QTNF3  | -1.557739682 | 1.626564796  | -3.524609045 | 0.000543154 |
| CPEB2    | -1.016860933 | 4.896263107  | -3.524342231 | 0.000543664 |
| JAG2     | 1.288531308  | 5.524451559  | 3.521717111  | 0.000548708 |
| HMCN2    | -2.028756724 | 2.370083913  | -3.520820219 | 0.000550441 |
| VILL     | -2.197800666 | 3.885849783  | -3.519685043 | 0.000552642 |
| SNED1    | -1.338164039 | 3.75803695   | -3.518269827 | 0.000555398 |
| TNFAIP6  | 1.716170146  | 2.121352066  | 3.511598887  | 0.000568562 |
| THOC3    | 1.002099835  | 3.878759242  | 3.511359773  | 0.00056904  |
| NEXN     | -1.490116935 | 3.610636375  | -3.511148834 | 0.000569461 |
| PTGIS    | -2.763532769 | 2.46110804   | -3.509400706 | 0.000572964 |
| HAVCR2   | 1.418984487  | 2.580445421  | 3.508549741  | 0.000574677 |
| PRRG4    | 1.231677831  | 6.301263923  | 3.507715898  | 0.00057636  |
| CA4      | -2.800772111 | -2.000876064 | -3.506740318 | 0.000578334 |
| CEP19    | 1.328087672  | 1.271861157  | 3.506598616  | 0.000578622 |
| LRP1B    | -2.37506039  | -1.360405053 | -3.50607066  | 0.000579694 |
| SEMA3B   | -1.811224354 | 4.221730965  | -3.503814136 | 0.000584296 |
| LIPM     | -1.6622677   | 0.327257018  | -3.501776735 | 0.00058848  |
| CTSC     | 1.180721742  | 7.426319056  | 3.500749522  | 0.000590601 |
| CD36     | -1.817531196 | 3.119329056  | -3.500212036 | 0.000591713 |
| ALB      | -2.541753795 | -2.090074142 | -3.499783002 | 0.000592602 |
| C5       | -1.410365887 | 2.57955619   | -3.499137766 | 0.000593942 |
| CPLX2    | -2.969420236 | -1.318543493 | -3.497546509 | 0.000597259 |
| NLRC5    | 1.128848746  | 6.270933955  | 3.497317971  | 0.000597737 |
| ZNF85    | -1.570602064 | 0.771731126  | -3.496162735 | 0.000600157 |
| APOBEC3F | 1.033677774  | 2.575937209  | 3.494561918  | 0.000603526 |
| H2AC11   | 1.369219559  | 1.112141471  | 3.491013899  | 0.000611057 |
| NPY1R    | -2.168020287 | -1.486680365 | -3.488174085 | 0.000617148 |
| HOXA9    | 2.1972581    | 1.262962881  | 3.486386022  | 0.000621013 |
| ABHD11   | 1.086139357  | 4.987324036  | 3.486070506  | 0.000621697 |
| TMPRSS4  | 1.722401874  | 6.68992876   | 3.484899342  | 0.000624243 |
| CNN1     | -2.263618132 | 3.96317182   | -3.482939727 | 0.000628525 |
| PLPP3    | -1.026972547 | 5.405509657  | -3.482863995 | 0.000628691 |
| TPO      | -1.92588894  | -0.985765386 | -3.479966889 | 0.000635074 |
| PAEP     | 2.234437901  | -2.184712336 | 3.477119433  | 0.000641406 |
| PFKFB4   | 1.250624205  | 3.232897547  | 3.474514291  | 0.000647252 |
| HOXD8    | 1.30974558   | 1.38527203   | 3.471007421  | 0.0006552   |
| NECTIN1  | 1.690656149  | 7.77524732   | 3.469792171  | 0.000657975 |
| KIF13B   | -1.392888817 | 5.939530405  | -3.46875811  | 0.000660345 |
| CCDC69   | -1.390360223 | 4.109912139  | -3.46810099  | 0.000661856 |
| BAIAP3   | -1.34268011  | 1.564905119  | -3.468012759 | 0.000662059 |
| RDH12    | -2.311478413 | 0.4910513    | -3.467680554 | 0.000662824 |
| RPS6KA2  | -1.047357788 | 4.956154102  | -3.46599163  | 0.000666726 |
| FAM3B    | -3.180276525 | 2.199104375  | -3.465702022 | 0.000667398 |
| TPH1     | -1.984094722 | -0.301111912 | -3.464465685 | 0.000670271 |
| BMPER    | -1.881358504 | -0.436543576 | -3.463247823 | 0.000673112 |
| HAP1     | 2.5032605    | 1.25145859   | 3.463080643  | 0.000673503 |
| ACOX2    | -1.445514803 | 0.926903821  | -3.463021779 | 0.000673641 |
| IFI27    | 1.556951375  | 7.629674883  | 3.460528581  | 0.000679497 |
| VMO1     | 1.382842944  | 0.380990381  | 3.456074467  | 0.000690079 |
| CASP5    | 2.101579371  | -1.015630709 | 3.454098833  | 0.000694822 |
| CXCL11   | 2.322060322  | 1.847588214  | 3.453161292  | 0.000697083 |
| PDZRN4   | -2.31435461  | -1.200328656 | -3.452756479 | 0.000698061 |

|            |              |              |              |             |
|------------|--------------|--------------|--------------|-------------|
| ERVMER34-1 | 2.00802215   | 2.69496237   | 3.452403189  | 0.000698917 |
| ZNF467     | -1.168792966 | 2.565409909  | -3.45060366  | 0.000703287 |
| AASS       | -1.182382232 | 2.565645048  | -3.449895509 | 0.000705014 |
| FLNC       | -2.070119655 | 4.92318785   | -3.449621314 | 0.000705684 |
| ANK2       | -1.951872396 | 2.26841827   | -3.448891513 | 0.000707469 |
| CFAP221    | -2.23423194  | -1.402409392 | -3.44841434  | 0.000708639 |
| TP73       | 2.041786175  | 3.220805853  | 3.448021908  | 0.000709602 |
| ANO2       | -1.125021698 | -0.258927165 | -3.4473112   | 0.00071135  |
| GKAP1      | -1.23211957  | 1.294711966  | -3.44536094  | 0.000716167 |
| C15orf65   | -1.095590421 | -0.08614142  | -3.444482243 | 0.000718347 |
| ADAMTS2    | 1.63763449   | 5.267062159  | 3.442027853  | 0.00072447  |
| FCHO1      | 1.514952301  | 2.835757742  | 3.440919834  | 0.00072725  |
| PLPP2      | 1.085018819  | 5.84608486   | 3.438999504  | 0.000732092 |
| MARCKSL1   | 1.10941495   | 7.147538838  | 3.438979979  | 0.000732141 |
| SARDH      | -1.551920201 | 0.690160191  | -3.43884142  | 0.000732492 |
| FAM151A    | -1.069137744 | -0.147927436 | -3.438282689 | 0.000733907 |
| PDE4C      | -2.185965518 | 1.026256071  | -3.436943104 | 0.00073731  |
| WIF1       | -2.769457969 | -2.02752641  | -3.436933661 | 0.000737334 |
| SPATA6     | -1.211227554 | 2.731836467  | -3.43615164  | 0.000739328 |
| ZDHHC15    | -1.669028837 | -0.845177438 | -3.433399119 | 0.000746386 |
| CHSY3      | 1.247289524  | 1.097686744  | 3.432059206  | 0.000749844 |
| CACNB4     | -1.714421995 | 0.513300867  | -3.431692296 | 0.000750794 |
| DPF1       | 1.663626751  | 1.067061204  | 3.431597611  | 0.000751039 |
| ORM2       | -2.534333471 | -2.342227871 | -3.430885748 | 0.000752885 |
| PDGFRB     | 1.311075147  | 6.714481759  | 3.430811878  | 0.000753077 |
| PLCL1      | -1.334467142 | 1.814612844  | -3.430334328 | 0.000754318 |
| IL13RA2    | 1.956102359  | -0.411904314 | 3.43025621   | 0.000754521 |
| CGB7       | 1.868611173  | -0.821410605 | 3.428797279  | 0.000758326 |
| STX19      | -1.585386907 | 1.031478319  | -3.428207914 | 0.000759868 |
| KLHL3      | -1.193209914 | 2.241115772  | -3.428029265 | 0.000760336 |
| MAP6       | -1.700434364 | 0.633837946  | -3.427883563 | 0.000760718 |
| P4HA3      | 1.25903621   | 1.000228982  | 3.426642819  | 0.000763977 |
| RPL39L     | 1.760904717  | 2.818105507  | 3.425966352  | 0.00076576  |
| MSR1       | 1.601600708  | 3.12932724   | 3.422171024  | 0.000775834 |
| STK32B     | -1.537138856 | 0.648091047  | -3.420217267 | 0.000781068 |
| OAS1       | 1.259661036  | 6.016683992  | 3.414799414  | 0.000795755 |
| CDH19      | -2.769565272 | -0.469696804 | -3.411806093 | 0.000803981 |
| BVES       | -1.823065111 | 2.065167494  | -3.410828294 | 0.000806685 |
| RNASE2     | 1.63630276   | -1.148635545 | 3.410549836  | 0.000807456 |
| FILIP1L    | -1.28034939  | 5.239679973  | -3.410223445 | 0.000808362 |
| MYH11      | -2.72796381  | 7.30629023   | -3.409406707 | 0.000810631 |
| CXCL5      | 2.927969435  | 1.938010247  | 3.4077305    | 0.000815308 |
| FAM229B    | -1.207655984 | 1.210909377  | -3.406065723 | 0.000819978 |
| C20orf204  | 1.418059358  | 0.505654352  | 3.405793907  | 0.000820742 |
| RIMS1      | -2.104945105 | -1.434514886 | -3.403929454 | 0.000826006 |
| IQCN       | -1.541170608 | 1.926791134  | -3.403477555 | 0.000827287 |
| PRICKLE2   | -1.336909784 | 3.417123484  | -3.40116337  | 0.000833874 |
| PLXDC1     | 1.033911325  | 3.787458782  | 3.400439048  | 0.000835946 |
| MME        | 1.749380154  | 2.923849681  | 3.399192038  | 0.000839525 |
| FSIP2      | -1.952346224 | 1.45278424   | -3.398043613 | 0.000842833 |
| HMGCS2     | -4.438397799 | 1.387685233  | -3.392760115 | 0.000858209 |
| ZNF568     | -1.538419856 | 0.956011334  | -3.392063857 | 0.000860255 |
| HACD1      | -1.400937558 | 1.306891761  | -3.390462656 | 0.000864977 |

|            |              |              |              |             |
|------------|--------------|--------------|--------------|-------------|
| PLA2G4E    | 3.29705562   | 1.832774717  | 3.389348353  | 0.000868278 |
| NEB        | 1.674564101  | 3.268937589  | 3.388754859  | 0.00087004  |
| GIMAP5     | -1.382731048 | -0.203089222 | -3.387603398 | 0.00087347  |
| ST6GALNAC1 | -2.774793566 | 3.640352503  | -3.385913023 | 0.000878527 |
| B4GALNT3   | -1.387611651 | 5.993225468  | -3.385780745 | 0.000878924 |
| ACTG2      | -2.256652688 | 5.411895189  | -3.385410891 | 0.000880035 |
| FOXD2      | 1.438778981  | 1.929204208  | 3.384683136  | 0.000882224 |
| SHROOM3    | -1.827809722 | 6.387600532  | -3.383945805 | 0.000884447 |
| CHGB       | -2.500844456 | -0.937569667 | -3.383279775 | 0.00088646  |
| KRT81      | 1.829913265  | -1.103784743 | 3.382689293  | 0.000888248 |
| ZNF470     | -1.590910943 | 0.762607929  | -3.381157283 | 0.000892903 |
| KCNS3      | 1.708569975  | 3.249263665  | 3.376844866  | 0.000906129 |
| ZC4H2      | -1.561762676 | 1.955170592  | -3.374256491 | 0.000914155 |
| ITGB4      | 1.14927033   | 9.478190812  | 3.372941552  | 0.000918257 |
| SSTR2      | -1.306649574 | 0.931488789  | -3.372193704 | 0.000920598 |
| CST2       | 2.011331765  | -0.866121825 | 3.371782066  | 0.000921889 |
| DMBX1      | 2.030948962  | -1.049577434 | 3.370780148  | 0.000925038 |
| IGFBP5     | -1.575570015 | 7.806185441  | -3.370681938 | 0.000925348 |
| IGFBP3     | 1.463409286  | 6.968244275  | 3.3677713    | 0.000934556 |
| CYP4X1     | -2.064860313 | 2.366940743  | -3.367359956 | 0.000935865 |
| PPP1R13L   | 1.186647587  | 6.603058213  | 3.365798276  | 0.000940847 |
| MREG       | 1.084350756  | 4.027284611  | 3.365338139  | 0.00094232  |
| TSHZ2      | -1.304562029 | 4.217024876  | -3.363624974 | 0.000947822 |
| SMIM10L2A  | -1.945746513 | 0.208681352  | -3.363236252 | 0.000949075 |
| SLC9A2     | -2.527741784 | 2.936240106  | -3.362370231 | 0.000951871 |
| ANKRD18B   | 2.858169181  | 0.66100502   | 3.361835944  | 0.0009536   |
| ARMH4      | -1.33219251  | 1.711662989  | -3.360962121 | 0.000956435 |
| PTPRM      | -1.155986469 | 4.619652988  | -3.3595868   | 0.000960911 |
| EFNA3      | 1.554003066  | 3.086635247  | 3.359215368  | 0.000962124 |
| LRMDA      | -1.356545006 | 1.170466634  | -3.358444092 | 0.000964646 |
| TNIP3      | 1.674094954  | 0.307502468  | 3.355548194  | 0.00097417  |
| PNPLA4     | -1.076391907 | 3.332979192  | -3.35508503  | 0.000975702 |
| SLC25A20   | -1.046137224 | 3.094613493  | -3.354911662 | 0.000976276 |
| CXCL12     | -1.564562181 | 3.732707547  | -3.35455178  | 0.000977468 |
| MASP1      | -1.767421574 | 0.293253394  | -3.354228759 | 0.000978539 |
| TTC28      | -1.134635674 | 4.342996051  | -3.353908152 | 0.000979603 |
| ZNF583     | -1.284019432 | 0.076870464  | -3.353331086 | 0.000981522 |
| TTLL7      | -1.646656151 | 2.646050032  | -3.350660422 | 0.000990446 |
| POLR3G     | 1.136245602  | 2.552638231  | 3.34824657   | 0.000998577 |
| GATA4      | -3.601168755 | 2.575726045  | -3.348132921 | 0.000998961 |
| H4C8       | 1.417755829  | 0.803071456  | 3.346853523  | 0.001003298 |
| DES        | -3.42016354  | 4.791692134  | -3.344416736 | 0.001011606 |
| AOX1       | -2.175363778 | 1.004679104  | -3.344295236 | 0.001012022 |
| PAQR8      | -1.908235715 | 4.598630328  | -3.342374922 | 0.001018617 |
| TGFA       | 1.245027308  | 5.338416845  | 3.341698166  | 0.001020951 |
| MNDA       | 1.350187462  | 1.740539891  | 3.338338637  | 0.00103261  |
| IL1RL1     | -1.886408222 | 0.702712549  | -3.338290318 | 0.001032778 |
| TM4SF19    | 2.447707646  | 0.259514732  | 3.338023189  | 0.001033711 |
| SP6        | 1.549339692  | 2.930742806  | 3.336135792  | 0.001040322 |
| ALDH2      | -1.077051341 | 6.620894445  | -3.335407547 | 0.001042883 |
| KANK2      | -1.112741926 | 5.747466547  | -3.335365426 | 0.001043032 |
| PPP1R16B   | -1.369060294 | 2.992223082  | -3.334781608 | 0.00104509  |
| PI3        | 3.272588365  | 6.584268233  | 3.333314315  | 0.001050278 |

|           |              |              |              |             |
|-----------|--------------|--------------|--------------|-------------|
| ACSS1     | -1.236457071 | 5.58308943   | -3.332387629 | 0.001053568 |
| ZNF433    | -1.379348744 | 1.134454057  | -3.328914782 | 0.001065981 |
| BHMT2     | -1.585816205 | -0.058106905 | -3.32883071  | 0.001066284 |
| SLC28A2   | -3.047320408 | -0.57992957  | -3.328147258 | 0.001068743 |
| MAPK12    | 1.339977298  | 2.810317332  | 3.325576464  | 0.001078042 |
| SHE       | -1.187876752 | 1.907733579  | -3.324153041 | 0.001083224 |
| INAVA     | 1.177358059  | 6.322917012  | 3.322604297  | 0.001088888 |
| LEF1      | 1.281943621  | 3.805998828  | 3.322120841  | 0.001090661 |
| LILRB4    | 1.524040218  | 2.465840099  | 3.32055298   | 0.001096432 |
| CHPT1     | -1.160678428 | 4.914907021  | -3.319685871 | 0.001099636 |
| CMTM3     | 1.130836545  | 4.071316485  | 3.319524452  | 0.001100233 |
| COCH      | 2.085272845  | 1.705626947  | 3.318839732  | 0.001102771 |
| SYP       | -1.38231378  | 0.599936562  | -3.318140221 | 0.001105368 |
| BAMBI     | 1.850962291  | 3.243137756  | 3.31797731   | 0.001105974 |
| S100A2    | 3.888583164  | 6.491569715  | 3.317594978  | 0.001107397 |
| ARMCX4    | -1.206817438 | 2.595497165  | -3.316379559 | 0.001111932 |
| HOXD10    | 3.119021394  | 0.982910452  | 3.315240193  | 0.001116199 |
| PDE1A     | -1.352209784 | 1.2459876    | -3.313511918 | 0.001122701 |
| NID2      | 1.41197879   | 4.236509299  | 3.313422776  | 0.001123037 |
| TUBA3C    | -1.861644974 | -3.527271631 | -3.313401713 | 0.001123116 |
| TLR2      | 1.18581214   | 3.905036357  | 3.313307681  | 0.001123471 |
| ALDH1L1   | -2.422345555 | 1.468730633  | -3.313189085 | 0.001123919 |
| ABAT      | -1.275209842 | 3.576447669  | -3.311320745 | 0.001130994 |
| WFDC1     | -1.350611071 | 2.282143327  | -3.310812799 | 0.001132925 |
| LRRC26    | -2.657499136 | -0.202919496 | -3.306932445 | 0.001147776 |
| CDH23     | -1.382044611 | 1.299334646  | -3.305532203 | 0.00115318  |
| STARD8    | -1.043714041 | 2.515093098  | -3.302182377 | 0.001166203 |
| BEX1      | -2.357140535 | -2.447609089 | -3.300316669 | 0.001173516 |
| SEMA7A    | 1.110379445  | 3.079877811  | 3.300147909  | 0.00117418  |
| LYN       | 1.000622817  | 5.83228645   | 3.300145714  | 0.001174188 |
| KLF2      | -1.283000874 | 4.964250221  | -3.299780868 | 0.001175624 |
| SNAI1     | 1.161454476  | 2.15748144   | 3.299645851  | 0.001176156 |
| CD302     | -1.186545393 | 2.60125885   | -3.299419644 | 0.001177047 |
| ASTN2     | -1.542917996 | 1.840273042  | -3.297305375 | 0.001185409 |
| SPATA18   | -1.175364668 | 2.431618071  | -3.296696991 | 0.001187826 |
| PEG3      | -1.506896696 | 0.230581404  | -3.295270938 | 0.001193508 |
| RPH3AL    | -1.490097692 | 2.951420879  | -3.294074115 | 0.001198296 |
| CASP1     | 1.244945045  | 4.519492268  | 3.293687667  | 0.001199846 |
| GPBAR1    | -1.24688795  | -0.080383169 | -3.291229539 | 0.001209749 |
| CYP2C9    | -2.461484607 | 0.027734934  | -3.290055213 | 0.001214506 |
| HRH1      | 1.041520321  | 3.773492955  | 3.289341203  | 0.001217408 |
| SLC2A5    | 1.36748338   | 1.668571635  | 3.289292272  | 0.001217607 |
| XK        | -2.108858175 | 3.130141166  | -3.289225268 | 0.001217879 |
| SRD5A1    | 1.072376463  | 4.98593488   | 3.289132998  | 0.001218255 |
| BMP8A     | 1.242004092  | 1.076038026  | 3.289092133  | 0.001218421 |
| GALNT15   | -1.766672559 | 1.628820168  | -3.288783454 | 0.001219678 |
| AOC3      | -1.603563773 | 3.829448975  | -3.288744461 | 0.001219837 |
| C17orf107 | -1.109758247 | 1.290387289  | -3.288334161 | 0.001221511 |
| MUC5AC    | -4.879346278 | 3.072711956  | -3.283342315 | 0.001242039 |
| GPX3      | -1.690133946 | 5.394491725  | -3.283148291 | 0.001242844 |
| STARD13   | -1.141165771 | 4.06322568   | -3.283100237 | 0.001243043 |
| SHISA6    | -2.261656727 | -0.443513897 | -3.281561716 | 0.001249439 |
| IFIT2     | 1.302847411  | 3.280060772  | 3.280816057  | 0.001252551 |

|          |              |              |              |             |
|----------|--------------|--------------|--------------|-------------|
| S100A10  | 1.060382739  | 8.70957449   | 3.279349056  | 0.001258692 |
| SLC6A14  | 2.716156243  | 3.396834774  | 3.276124587  | 0.001272291 |
| TTC6     | -2.028941965 | 0.224879048  | -3.275827019 | 0.001273553 |
| CREG2    | 2.051228234  | 1.411963499  | 3.274557099  | 0.001278951 |
| ADAMTS13 | -1.018470627 | 1.788844705  | -3.27414112  | 0.001280724 |
| IQGAP2   | -2.014369034 | 4.645906434  | -3.272544595 | 0.001287549 |
| EPHA2    | 1.16362354   | 7.243502124  | 3.270892838  | 0.001294646 |
| HSPB1    | 1.714066891  | 9.643533292  | 3.269217379  | 0.001301882 |
| SUCNR1   | 1.670264317  | 0.589068656  | 3.268641846  | 0.001304376 |
| CALHM6   | 1.535752424  | 1.07226362   | 3.267636023  | 0.001308746 |
| SAMD9    | 1.589402397  | 6.730747422  | 3.266981528  | 0.001311597 |
| SDC1     | 1.427854997  | 8.80252316   | 3.265907751  | 0.001316287 |
| COBL     | -2.220063835 | 4.524013557  | -3.265711362 | 0.001317146 |
| ADCYAP1  | -1.917655501 | -1.29305259  | -3.265668659 | 0.001317333 |
| FAM83D   | 1.014684448  | 5.685956642  | 3.264498004  | 0.001322467 |
| PRUNE2   | -2.344470116 | 3.6030651    | -3.263757824 | 0.001325723 |
| NECTIN4  | 1.682346067  | 5.106203536  | 3.261926246  | 0.001333812 |
| ZNF660   | -1.151646556 | 0.176474474  | -3.260191197 | 0.001341517 |
| NDRG2    | -1.195056245 | 5.115115802  | -3.256507884 | 0.001358012 |
| CYBA     | 1.024045482  | 6.664022197  | 3.254410943  | 0.001367486 |
| CHRD1    | -3.091730585 | 0.825726565  | -3.253625399 | 0.001371051 |
| H2BC5    | 1.237208861  | 3.64609883   | 3.253327638  | 0.001372405 |
| BTC      | -1.516263794 | 1.867667592  | -3.252885574 | 0.001374416 |
| SLC6A16  | -1.299843904 | -0.047120275 | -3.250190902 | 0.00138674  |
| PLAAT5   | -2.281953777 | -0.863296782 | -3.249939155 | 0.001387896 |
| UBE2QL1  | -1.929421912 | 0.001839145  | -3.247913764 | 0.001397233 |
| MT1E     | -1.747614139 | 4.900389271  | -3.246816901 | 0.001402314 |
| ALDOB    | -3.555929405 | 0.490209976  | -3.24636845  | 0.001404397 |
| S100A1   | -1.191080363 | 0.975165639  | -3.244512401 | 0.001413046 |
| ZNF439   | -1.225095011 | 1.202565481  | -3.243873013 | 0.001416036 |
| DOC2A    | 1.75614435   | 0.063093784  | 3.24035793   | 0.001432585 |
| NUDT12   | -1.01894016  | 3.550762046  | -3.238768223 | 0.001440127 |
| ICAM1    | 1.282535801  | 5.497577197  | 3.23855881   | 0.001441124 |
| LUM      | 1.431603823  | 7.668771003  | 3.238534914  | 0.001441237 |
| TCTEX1D2 | 1.179357061  | 1.797299568  | 3.238315732  | 0.001442281 |
| DIRAS1   | -2.136922616 | 0.583378025  | -3.23763059  | 0.001445548 |
| GPC2     | 1.278217979  | -0.104567196 | 3.235612276  | 0.001455211 |
| FOSL1    | 1.623040415  | 5.298692246  | 3.23515108   | 0.001457428 |
| IL2RA    | 1.382584966  | 1.872824651  | 3.233926435  | 0.001463329 |
| WNT5A    | 1.531289884  | 5.706867547  | 3.229439667  | 0.001485139 |
| LTB4R    | 1.718668789  | 4.713354885  | 3.228669961  | 0.00148891  |
| LGI4     | -1.200520338 | 0.777888234  | -3.225053124 | 0.001506753 |
| ADH1C    | -3.508709047 | 1.259206603  | -3.220797959 | 0.001527999 |
| VIT      | -2.402098722 | -0.679852292 | -3.216902491 | 0.001547693 |
| SIGLEC12 | 1.737527287  | 0.092174517  | 3.216849824  | 0.001547961 |
| KRT6B    | 4.37270767   | 6.120432619  | 3.216122997  | 0.001551662 |
| MAPK4    | -2.342323489 | -0.919396551 | -3.215335293 | 0.001555682 |
| PPP1R3C  | -2.112589581 | 2.11775932   | -3.215138139 | 0.00155669  |
| MFAP4    | -1.69641085  | 5.073227823  | -3.214265656 | 0.001561157 |
| PHYHIP   | -1.478407516 | 0.69143788   | -3.211559668 | 0.001575087 |
| ARHGAP6  | -1.513705128 | 1.829178388  | -3.209775612 | 0.001584335 |
| CLEC7A   | 1.5468593    | 2.825215514  | 3.20649195   | 0.001601487 |
| B4GALNT1 | 2.202494625  | 2.380346046  | 3.20582744   | 0.001604979 |



|          |              |              |              |             |
|----------|--------------|--------------|--------------|-------------|
| GNA15    | 1.866859458  | 4.704123537  | 3.205437923  | 0.001607029 |
| ZKSCAN7  | -1.212058865 | 0.001901713  | -3.205194663 | 0.00160831  |
| FOLH1    | 1.502221467  | 1.104685537  | 3.204052808  | 0.001614339 |
| LHX2     | 2.355635369  | -0.621970398 | 3.19957511   | 0.001638182 |
| SNPH     | -1.387581571 | 2.411661837  | -3.199244145 | 0.001639958 |
| SHC2     | -1.220537176 | 2.761566072  | -3.199207325 | 0.001640155 |
| ADCY5    | -1.944966556 | 2.6138675    | -3.19785977  | 0.001647403 |
| ARNTL2   | 1.172841332  | 6.073624192  | 3.197801149  | 0.001647719 |
| ZNF469   | 1.536323552  | 3.659386441  | 3.196573358  | 0.001654349 |
| PYGM     | -1.541556244 | 0.020975063  | -3.194449627 | 0.001665876 |
| HPDL     | 1.563200206  | 2.449980227  | 3.194388407  | 0.00166621  |
| INSM1    | -2.55060113  | -1.546367182 | -3.192744964 | 0.001675183 |
| TFF1     | -4.549003489 | 2.033849986  | -3.192625647 | 0.001675836 |
| MAT1A    | 2.098661931  | -0.894535418 | 3.190950611  | 0.001685031 |
| NRG4     | -1.489414302 | 0.597483478  | -3.190560806 | 0.001687177 |
| SLC38A11 | -2.198201542 | 0.927802503  | -3.187637403 | 0.001703356 |
| PALM3    | -2.387847522 | 0.398447342  | -3.187053751 | 0.001706604 |
| MROH6    | 1.439403773  | 4.955782789  | 3.185861108  | 0.001713257 |
| ZNF737   | -1.706455674 | 0.743973431  | -3.185328158 | 0.001716238 |
| FAM89A   | 1.088586208  | 3.608157587  | 3.18393592   | 0.001724048 |
| PPM1L    | -1.185279745 | 4.67935501   | -3.18362055  | 0.001725822 |
| PRLR     | -2.208193387 | 2.416779174  | -3.180139168 | 0.001745515 |
| CCL26    | 1.734185154  | -1.08156415  | 3.180019987  | 0.001746193 |
| CRAT     | -1.184950742 | 5.465335203  | -3.178859113 | 0.001752808 |
| TGFB1    | 1.213573129  | 6.529685378  | 3.178480226  | 0.001754972 |
| IFIT1    | 1.57396157   | 4.126995853  | 3.175882212  | 0.001769878 |
| SCNN1B   | -2.887129172 | 1.761725615  | -3.174836267 | 0.001775912 |
| EPSTI1   | 1.334334071  | 4.479299953  | 3.174483287  | 0.001777953 |
| NOVA1    | -1.747426952 | 0.525992322  | -3.171664067 | 0.001794329 |
| ZNF570   | -1.294275614 | 1.387155932  | -3.169843309 | 0.00180498  |
| PTX3     | -1.923933697 | -0.369473377 | -3.168763805 | 0.001811323 |
| CLU      | -1.712818683 | 7.171036119  | -3.165107514 | 0.001832959 |
| RASD2    | 1.413388434  | 2.614352399  | 3.164549122  | 0.001836284 |
| CYP1B1   | -1.990957526 | 2.863796446  | -3.163103498 | 0.001844919 |
| GHR      | -1.846655614 | 1.649045069  | -3.157275794 | 0.001880111 |
| HAGHL    | 1.090048506  | 1.887318406  | 3.15601304   | 0.001887818 |
| GADD45B  | -1.114273127 | 4.424763809  | -3.152055828 | 0.00191216  |
| RBM47    | -1.12819468  | 7.195971837  | -3.151514109 | 0.001915514 |
| S1PR5    | 2.494813137  | 1.798604965  | 3.151178266  | 0.001917597 |
| SLCO3A1  | 1.086230899  | 5.434471089  | 3.148397846  | 0.001934919 |
| LYPD8    | 2.46136217   | -1.761844198 | 3.147586875  | 0.001939999 |
| RAPGEF3  | -1.079578378 | 3.434329774  | -3.147087699 | 0.001943132 |
| PLPP4    | 2.144059353  | -0.533813593 | 3.144185178  | 0.001961441 |
| KCNH6    | -1.929757046 | -2.487092778 | -3.142425544 | 0.001972619 |
| LNX1     | -1.070206428 | 3.593047039  | -3.141217381 | 0.001980327 |
| FRMD3    | -1.442649644 | 1.428939783  | -3.140910653 | 0.001982289 |
| DNM1     | 1.280945675  | 4.659308683  | 3.139907946  | 0.001988713 |
| RALGPS1  | -1.244314759 | 4.220515703  | -3.139905973 | 0.001988726 |
| B3GNT4   | 1.11814183   | 0.722467778  | 3.138618178  | 0.001997006 |
| FNDC11   | 1.244062523  | -0.24305307  | 3.138608456  | 0.001997068 |
| SIRPB1   | 1.313000012  | 0.453658457  | 3.138165655  | 0.001999923 |
| SFRP5    | -2.023856157 | -1.703467193 | -3.137031875 | 0.002007248 |
| NAALADL2 | -1.415346359 | 3.029193614  | -3.1354849   | 0.002017284 |

|           |              |              |              |             |
|-----------|--------------|--------------|--------------|-------------|
| EPHX2     | -1.216104465 | 3.796509451  | -3.134758467 | 0.002022013 |
| KBTBD12   | -2.613259026 | -0.072577382 | -3.13454252  | 0.00202342  |
| TNFAIP2   | 1.195229717  | 6.82132084   | 3.134018598  | 0.002026839 |
| RAB31     | 1.198866528  | 6.014428666  | 3.133315998  | 0.002031433 |
| RECK      | -1.142881291 | 2.511534859  | -3.132245947 | 0.002038447 |
| P2RX1     | -1.669447625 | 0.537375806  | -3.131626811 | 0.002042515 |
| NR0B2     | -3.369442297 | -0.475528385 | -3.129404153 | 0.002057183 |
| TRIM36    | -1.573732038 | 1.702508579  | -3.128972991 | 0.00206004  |
| EFCAB6    | -1.204265726 | 0.004999518  | -3.127384888 | 0.002070594 |
| ARL4C     | 1.257522286  | 5.399797923  | 3.127119105  | 0.002072365 |
| ZNF366    | -1.121510321 | 0.7802475    | -3.125339239 | 0.002084262 |
| OVOL1     | 1.476820944  | 4.141961448  | 3.118773227  | 0.002128698 |
| PER1      | -1.127663611 | 6.128494288  | -3.116912566 | 0.002141449 |
| KLHL32    | -1.590815356 | -1.589190029 | -3.115140422 | 0.002153659 |
| FAM20A    | -1.381764146 | 2.508331527  | -3.11205092  | 0.002175099 |
| TYROBP    | 1.295444769  | 4.250151251  | 3.110982361  | 0.00218256  |
| GPR3      | 1.176458454  | 0.955022484  | 3.110650922  | 0.002184879 |
| GAL3ST4   | 1.126490879  | 2.976274714  | 3.110575396  | 0.002185408 |
| PRRX1     | 1.617602312  | 4.274526933  | 3.110339927  | 0.002187058 |
| PRIMA1    | -2.419445942 | 1.599703709  | -3.109749927 | 0.002191195 |
| PRSS22    | 1.62555591   | 4.747885793  | 3.108492527  | 0.002200038 |
| ANXA2R    | 1.003080246  | 0.960437271  | 3.104838941  | 0.002225918 |
| RGL3      | -2.219888669 | 1.245412693  | -3.104551652 | 0.002227965 |
| ZNF665    | -1.384961396 | -0.432787981 | -3.102035795 | 0.002245965 |
| FZD6      | 1.054155227  | 6.366807314  | 3.102033806  | 0.00224598  |
| SLAMF8    | 1.253952671  | 2.77633316   | 3.100957254  | 0.002253723 |
| TDGF1     | -2.336721955 | -1.793724584 | -3.098016575 | 0.002275001 |
| ZNF790    | -1.33307715  | 0.982046021  | -3.097533284 | 0.002278515 |
| FHL5      | -1.380615361 | 0.207561421  | -3.096330814 | 0.002287282 |
| CELF2     | -1.360497419 | 3.944369614  | -3.09529533  | 0.002294856 |
| TSPOAP1   | -1.401657404 | 2.606666229  | -3.094697473 | 0.002299239 |
| CARD9     | 1.102010162  | 1.723981559  | 3.094315258  | 0.002302046 |
| CRISPLD1  | 1.447038525  | 2.579325215  | 3.093335204  | 0.002309256 |
| CACNA1C   | -1.197334789 | 3.427521774  | -3.092666608 | 0.002314187 |
| MAATS1    | -2.152246283 | -0.365762238 | -3.092548283 | 0.002315061 |
| MEX3B     | 1.099307874  | 1.937853194  | 3.090302316  | 0.002331703 |
| PGPEP1    | -1.186566827 | 4.439849813  | -3.090033517 | 0.002333702 |
| VWA5A     | -1.112948934 | 4.159615662  | -3.088855053 | 0.002342485 |
| HEPHL1    | 2.825427829  | 2.098570129  | 3.088656744  | 0.002343966 |
| ARHGAP18  | -1.065399726 | 4.706547076  | -3.088255211 | 0.002346967 |
| MYRF      | -2.630026447 | 5.132441707  | -3.087188224 | 0.00235496  |
| KRT23     | 2.454975186  | 2.740800729  | 3.087015246  | 0.002356258 |
| SLC43A1   | -1.720557727 | 3.33182069   | -3.086947875 | 0.002356764 |
| G6PD      | 1.273945912  | 6.994816572  | 3.086722996  | 0.002358453 |
| CD44      | 1.159817199  | 9.035510001  | 3.085627095  | 0.0023667   |
| S1PR1     | -1.219401862 | 3.769066888  | -3.085559728 | 0.002367207 |
| KCNMB1    | -1.543028715 | 2.370055998  | -3.085091197 | 0.002370742 |
| PPP1R14C  | 2.595558042  | 3.437190875  | 3.084265888  | 0.00237698  |
| DIRAS3    | -1.24857885  | 0.027887526  | -3.083236766 | 0.00238478  |
| HSPA1B    | 1.004937155  | 6.286228926  | 3.080293869  | 0.002407214 |
| C20orf194 | -1.055034996 | 4.500327379  | -3.079178166 | 0.00241577  |
| AK4       | -1.208868242 | 5.395705184  | -3.079032881 | 0.002416886 |
| RGS16     | 1.186452725  | 3.338166272  | 3.076913073  | 0.002433227 |

|          |              |              |              |             |
|----------|--------------|--------------|--------------|-------------|
| KRT86    | 1.170324256  | -0.145454377 | 3.076848754  | 0.002433725 |
| TRNP1    | -1.730258194 | 4.650857502  | -3.076450849 | 0.002436804 |
| CBLC     | 1.177627212  | 5.320436305  | 3.076282934  | 0.002438104 |
| CCL22    | 1.449574446  | 1.975476541  | 3.075800131  | 0.002441847 |
| KCNG3    | 1.875930822  | -0.991114001 | 3.075454837  | 0.002444527 |
| HHIP     | -2.182462684 | 0.645154466  | -3.069681136 | 0.002489746 |
| SLC5A9   | -1.804962584 | -0.554158253 | -3.069219737 | 0.002493393 |
| TMC7     | 1.322872672  | 3.314473372  | 3.068621729  | 0.002498127 |
| CTSE     | -4.793119093 | 3.02680171   | -3.068538228 | 0.002498788 |
| AMIGO2   | 1.429774852  | 3.916673719  | 3.067230077  | 0.002509175 |
| GABRB2   | -2.188120579 | -1.038735048 | -3.06605491  | 0.002518539 |
| KCNS1    | 1.752660315  | -0.77249203  | 3.065739502  | 0.002521058 |
| ZNF844   | -1.546760361 | 2.095183393  | -3.065498312 | 0.002522986 |
| RTL5     | -1.317306961 | 1.37888955   | -3.062107285 | 0.002550234 |
| CD1D     | -1.267424884 | -0.123057571 | -3.060695344 | 0.002561659 |
| PACSIN1  | -1.688031957 | -0.297681967 | -3.060499608 | 0.002563247 |
| FAM171A2 | 1.426890402  | 1.510436733  | 3.059457894  | 0.002571711 |
| KIF3C    | 1.140372058  | 3.84059225   | 3.059043757  | 0.002575083 |
| COL6A5   | -1.635245557 | -0.405546948 | -3.058931278 | 0.002576    |
| KRT15    | 2.898134256  | 5.898494253  | 3.058746988  | 0.002577502 |
| MISP3    | -1.413652382 | 2.773156505  | -3.058088409 | 0.002582878 |
| PERP     | 1.523995061  | 9.5145329    | 3.058021157  | 0.002583428 |
| GJB5     | 2.798964648  | 2.790962535  | 3.055840739  | 0.002601303 |
| C12orf56 | 2.312469539  | 0.771539725  | 3.053379422  | 0.002621618 |
| CLDN18   | -4.183150016 | 3.974194987  | -3.05317623  | 0.002623302 |
| C9orf152 | -3.040402715 | 2.269391517  | -3.053139561 | 0.002623606 |
| NDNF     | -1.775946603 | 0.729200635  | -3.050129496 | 0.002648666 |
| KLK6     | 2.887488435  | 3.995857873  | 3.049426239  | 0.002654553 |
| PRKAR2B  | -1.41291119  | 2.754623222  | -3.046234392 | 0.002681423 |
| SIAE     | -1.070540596 | 4.6320052    | -3.044986245 | 0.002691998 |
| PLCB4    | -1.783237458 | 3.80873433   | -3.041862687 | 0.002718632 |
| PLEKHN1  | 1.414224129  | 3.016250147  | 3.040945176  | 0.002726502 |
| GABRB3   | -2.621494594 | 0.736977716  | -3.04090969  | 0.002726807 |
| GBP5     | 1.82596452   | 3.613024348  | 3.040566495  | 0.002729756 |
| KCNQ4    | -1.361286331 | 1.522922864  | -3.03951654  | 0.002738797 |
| CYP2U1   | -1.066921564 | 2.529610974  | -3.039198738 | 0.002741539 |
| SMAD9    | -1.375229226 | 2.764437454  | -3.03864223  | 0.002746347 |
| GJB7     | 1.970649187  | -0.432085559 | 3.038289433  | 0.002749399 |
| ARSI     | 1.974216789  | 1.997978889  | 3.036957196  | 0.002760951 |
| C9orf24  | -1.410484212 | -0.969811513 | -3.036240194 | 0.002767187 |
| TMEM151A | -2.157243658 | -0.438615356 | -3.034999945 | 0.002778005 |
| H3C4     | 1.255729012  | -0.033730502 | 3.034224152  | 0.002784791 |
| CYP26B1  | 1.536403325  | 2.709884303  | 3.031419071  | 0.002809457 |
| IFI16    | 1.394262927  | 6.858929106  | 3.030549095  | 0.002817147 |
| NECTIN3  | -1.686163473 | 3.312302323  | -3.02924368  | 0.002828724 |
| GSDMC    | 2.859861769  | 1.818224688  | 3.028300164  | 0.002837118 |
| AMY2B    | -1.287843943 | 1.151547945  | -3.028196842 | 0.002838038 |
| SERPINA4 | -3.151441355 | -0.709212323 | -3.027070957 | 0.002848088 |
| GDAP1    | 1.003342062  | 3.300328206  | 3.026273896  | 0.002855223 |
| S100A6   | 1.021229105  | 8.826056521  | 3.026088223  | 0.002856887 |
| TRPV4    | 1.732938736  | 3.093331386  | 3.024816257  | 0.002868312 |
| FER1L6   | -2.681597862 | 1.958327982  | -3.024250995 | 0.002873403 |
| RCOR2    | 1.216849137  | 1.900033735  | 3.01887979   | 0.002922196 |

|          |              |              |              |             |
|----------|--------------|--------------|--------------|-------------|
| SGCA     | -1.827059474 | 0.033054858  | -3.015616725 | 0.002952209 |
| EVPL     | 1.521572889  | 7.295016816  | 3.01519404   | 0.002956117 |
| GULP1    | -1.350569223 | 4.235082411  | -3.015064623 | 0.002957315 |
| MT2A     | -1.411994986 | 6.601871441  | -3.014500173 | 0.002962544 |
| BCAS1    | -2.825527429 | 3.077388769  | -3.014387525 | 0.002963588 |
| LGALS9C  | -1.898083338 | 0.884473923  | -3.01122798  | 0.002993023 |
| SYN2     | -1.851950389 | 0.191146625  | -3.011125778 | 0.00299398  |
| KLK8     | 2.765599179  | 1.816304579  | 3.010922876  | 0.00299588  |
| ANKRD24  | -1.238233559 | 0.183326254  | -3.010530615 | 0.002999556 |
| HCAR2    | 2.348346616  | 1.696429728  | 3.009678859  | 0.003007553 |
| ST18     | -1.70469536  | -1.270651381 | -3.009216561 | 0.003011902 |
| LTB4R2   | 1.313220737  | 2.606224737  | 3.007907566  | 0.003024247 |
| ACTL8    | 3.048530945  | -0.736962111 | 3.006877006  | 0.003033999 |
| GK       | 1.00817549   | 3.761801501  | 3.006741192  | 0.003035286 |
| TBX5     | 1.521905571  | 0.786905489  | 3.006294349  | 0.003039525 |
| ATP8A2   | -1.738299621 | -0.116035357 | -3.005041102 | 0.003051442 |
| CDA      | 1.92427824   | 3.299968569  | 3.00456524   | 0.003055979 |
| FZD8     | -1.272533686 | 3.13999234   | -3.003608597 | 0.003065117 |
| ATP6V0D2 | 1.41616922   | -0.438738654 | 3.002708481  | 0.003073739 |
| CILP     | -2.330276595 | 0.888504652  | -3.001826922 | 0.003082204 |
| QPCT     | 1.47989759   | 2.214681977  | 3.001294845  | 0.003087324 |
| SH3D21   | 1.171369035  | 3.233469915  | 3.000735394  | 0.003092716 |
| PILRA    | 1.077582285  | 1.475046715  | 2.999385845  | 0.003105757 |
| MMEL1    | -1.570521174 | -0.71581532  | -2.998527353 | 0.00311408  |
| ARL11    | 1.298797985  | 0.701635761  | 2.998104076  | 0.003118191 |
| ARL9     | 1.368115874  | -0.245064481 | 2.998058921  | 0.00311863  |
| MUC1     | -1.972332169 | 7.142688037  | -2.99795984  | 0.003119593 |
| IL21R    | 1.300811093  | 0.723682717  | 2.997658136  | 0.003122527 |
| FADD     | 1.100615916  | 4.175971149  | 2.997007169  | 0.003128868 |
| FAIM2    | -1.8192167   | 0.272044066  | -2.996037138 | 0.003138337 |
| GRIK5    | -1.391171855 | 0.427519515  | -2.995139479 | 0.003147124 |
| FAM183A  | 1.612937074  | -0.68758559  | 2.992021024  | 0.003177825 |
| KAZALD1  | -1.251597363 | 2.203424083  | -2.99159728  | 0.003182018 |
| RIPPLY3  | 1.947379415  | -0.140236125 | 2.991250255  | 0.003185455 |
| SOX30    | 1.577702867  | -0.176591993 | 2.9903098    | 0.003194788 |
| HBB      | -1.873185435 | 2.437901389  | -2.988153396 | 0.003216284 |
| DNAJC6   | -1.518788006 | 1.444742185  | -2.988118714 | 0.00321663  |
| LRRTM1   | -1.766589694 | -3.006799996 | -2.988045452 | 0.003217363 |
| CCL3L1   | 1.454518425  | -0.432276851 | 2.985897456  | 0.003238913 |
| AZGP1    | -2.998830016 | 2.035980379  | -2.985543036 | 0.003242482 |
| ZNF717   | -1.395670966 | 1.760188678  | -2.985395268 | 0.003243971 |
| ZFP3     | -1.46059358  | 2.603644988  | -2.98528904  | 0.003245041 |
| SLC41A2  | -1.656152506 | 3.714408682  | -2.984918166 | 0.003248782 |
| CD70     | 1.596570752  | -0.097273344 | 2.983588448  | 0.003262227 |
| STXBP6   | -1.914331837 | 2.034098331  | -2.982713498 | 0.003271101 |
| ZFP28    | -1.407079714 | 0.67653748   | -2.98100436  | 0.0032885   |
| CD14     | 1.089851743  | 4.862452443  | 2.98042044   | 0.003294464 |
| TAL1     | -1.119528491 | 0.521626649  | -2.979822915 | 0.003300577 |
| CDKN1C   | -1.175349447 | 3.808363417  | -2.977259666 | 0.003326919 |
| SYTL2    | -1.614108373 | 4.465929075  | -2.976971437 | 0.003329894 |
| UNC5A    | -1.763056575 | -0.43814077  | -2.975721567 | 0.003342819 |
| RGS7BP   | -1.753825284 | -1.084458147 | -2.975204251 | 0.003348182 |
| MRVII    | -1.317206954 | 4.473143904  | -2.975138036 | 0.003348869 |

|          |              |              |              |             |
|----------|--------------|--------------|--------------|-------------|
| FAM222A  | -1.092651075 | 3.039108724  | -2.973797125 | 0.00336281  |
| CRISPLD2 | -1.185998882 | 5.688953986  | -2.973654305 | 0.003364298 |
| SCN2A    | -2.137084104 | -0.320166562 | -2.973564743 | 0.003365232 |
| GABRQ    | 2.426574944  | -0.020175229 | 2.973422725  | 0.003366712 |
| GFRA3    | -1.805062593 | 0.089016567  | -2.972149458 | 0.003380014 |
| CD300A   | 1.097857296  | 1.526763642  | 2.972092843  | 0.003380606 |
| MSC      | 1.562197176  | 2.949791905  | 2.971725092  | 0.003384458 |
| PAX9     | 2.179061951  | 3.816725979  | 2.970469486  | 0.003397638 |
| SYNE3    | -1.007612347 | 2.934073423  | -2.970466433 | 0.00339767  |
| CHST6    | 1.316879603  | 1.777623193  | 2.968483411  | 0.003418582 |
| MFSD6L   | -1.861458522 | -0.764145013 | -2.967636397 | 0.00342755  |
| SNRPN    | -1.32856707  | 2.770796002  | -2.966580742 | 0.003438757 |
| HTR1D    | 2.134998108  | 0.279955495  | 2.9655269    | 0.003449979 |
| ZNF488   | 1.440062901  | 2.111977834  | 2.965074713  | 0.003454804 |
| MAP7D2   | -2.406117326 | 0.055061973  | -2.963435774 | 0.003472346 |
| PPARGC1A | -1.986549585 | 2.659104437  | -2.962713603 | 0.003480101 |
| SGSM1    | -1.739205231 | 1.199525034  | -2.961720337 | 0.003490793 |
| OSR2     | 1.038834355  | 3.086621378  | 2.96008455   | 0.003508468 |
| MPP7     | -1.168691409 | 4.871252883  | -2.959224948 | 0.003517789 |
| JCHAIN   | -2.490489993 | 4.994520143  | -2.95726272  | 0.003539152 |
| FOXL1    | 1.39891578   | 1.892853146  | 2.957154073  | 0.003540338 |
| VSTM2L   | -1.929168411 | 0.43979618   | -2.955792503 | 0.003555235 |
| EPHB2    | 1.677526269  | 5.091661625  | 2.954863442  | 0.003565434 |
| TMEM38A  | -1.293434634 | 2.41004878   | -2.954134315 | 0.003573456 |
| CHST15   | 1.039287359  | 5.183099957  | 2.953181657  | 0.003583963 |
| FIBCD1   | 2.143532399  | 0.747001823  | 2.952509999  | 0.003591388 |
| ZNF418   | -1.519241412 | 0.004719913  | -2.952170885 | 0.003595142 |
| EPB41L1  | -1.04706824  | 6.582539188  | -2.951822856 | 0.003598998 |
| MYEF2    | -1.843035812 | 1.441673889  | -2.951730479 | 0.003600023 |
| INMT     | -1.287125237 | 1.334414083  | -2.949224721 | 0.003627908 |
| KLHDC7B  | 2.132865739  | 2.335849024  | 2.949034856  | 0.003630029 |
| AQP9     | 1.566664775  | 0.943303137  | 2.947787004  | 0.003643997 |
| SLC13A3  | -1.599913804 | 1.236216801  | -2.946311826 | 0.003660574 |
| CCDC74B  | 1.362700699  | 0.053272016  | 2.9461878    | 0.00366197  |
| IL1RAP   | 1.248282505  | 5.180252259  | 2.944906892  | 0.003676425 |
| PRKAA2   | -2.428300296 | 1.521594268  | -2.944579674 | 0.003680126 |
| NPDC1    | -1.179210559 | 5.040979718  | -2.943885854 | 0.003687984 |
| ICAM5    | 1.677482997  | 0.417668942  | 2.943711437  | 0.003689962 |
| TNFAIP3  | 1.048109443  | 6.267323817  | 2.94036166   | 0.003728139 |
| SELENOP  | -1.515153542 | 5.045981418  | -2.940279107 | 0.003729085 |
| MUC16    | 2.724353078  | 1.570684531  | 2.940087206  | 0.003731283 |
| STARD10  | -1.041655563 | 6.385198893  | -2.939737384 | 0.003735294 |
| SULT1C2  | -3.22695566  | 1.852169082  | -2.939426862 | 0.003738857 |
| GABRR1   | 2.021598881  | -0.191190149 | 2.937846674  | 0.00375704  |
| FCGR1A   | 1.19639154   | 0.60755297   | 2.936688725  | 0.003770415 |
| SERPINE1 | 1.691408818  | 6.749034416  | 2.935300977  | 0.003786502 |
| TLCD4    | -1.695638578 | 3.064317605  | -2.93481089  | 0.003792198 |
| DLC1     | -1.002933344 | 4.341654818  | -2.93458233  | 0.003794858 |
| ANO7     | -1.301803523 | 1.745511777  | -2.933788771 | 0.003804104 |
| ENPP4    | -1.695058334 | 3.764971376  | -2.932741984 | 0.003816332 |
| WNT7A    | 2.618455379  | -0.845958786 | 2.930057261  | 0.003847858 |
| PDZD4    | -1.594624126 | 0.626647197  | -2.926431999 | 0.003890809 |
| KLB      | -1.28102653  | -0.770705212 | -2.926372282 | 0.00389152  |

|          |              |              |              |             |
|----------|--------------|--------------|--------------|-------------|
| TMPRSS2  | -2.76939575  | 4.64666683   | -2.925826784 | 0.003898022 |
| CFAP70   | -1.083634852 | 0.776108493  | -2.924261849 | 0.003916729 |
| SLC1A1   | -1.596768799 | 2.944942123  | -2.924226805 | 0.003917149 |
| LYPD1    | 1.381510985  | -0.325181904 | 2.923041805  | 0.003931371 |
| KRT16    | 3.898679603  | 6.249783434  | 2.920034856  | 0.003967672 |
| ECHDC3   | -2.09720854  | 2.049693572  | -2.919977621 | 0.003968365 |
| SLC39A14 | -1.076261341 | 7.032676595  | -2.919316386 | 0.00397639  |
| NCMAP    | -2.235767902 | 0.390022162  | -2.91824487  | 0.003989426 |
| MSX2     | 1.262357096  | 2.529849171  | 2.916627323  | 0.004009179 |
| SHISA3   | -1.880910893 | -1.217362735 | -2.910959591 | 0.0040791   |
| ASPN     | 1.402629151  | 3.831551921  | 2.90936444   | 0.004098979 |
| KCNMA1   | -1.930605321 | 3.302898265  | -2.909097511 | 0.004102314 |
| FGF14    | -1.77619778  | -0.639440159 | -2.908602674 | 0.004108504 |
| TRHDE    | -1.986907155 | -0.940586703 | -2.907442365 | 0.00412305  |
| ZNF528   | -1.383209731 | 2.269733673  | -2.90420286  | 0.004163913 |
| TBX15    | 1.454622862  | 0.238024185  | 2.902178606  | 0.004189635 |
| SLC12A2  | -1.433570178 | 6.457113606  | -2.901295564 | 0.004200901 |
| AGTR1    | -1.852512483 | -1.546091349 | -2.900585528 | 0.00420998  |
| LAPTM5   | 1.091290726  | 6.189631849  | 2.896951024  | 0.004256735 |
| ALPK3    | -1.196074342 | 3.509779401  | -2.895957391 | 0.004269599 |
| FGF13    | -1.667249661 | 1.064773285  | -2.89499036  | 0.004282154 |
| NLGN1    | -1.878820125 | -0.644249642 | -2.892823415 | 0.004310408 |
| S100A7   | 4.261704661  | 4.112270229  | 2.891912095  | 0.004322342 |
| PWWP3B   | -2.046301335 | -1.862687526 | -2.890523863 | 0.004340579 |
| APOH     | -2.026364321 | -2.636281116 | -2.890346682 | 0.004342911 |
| NBEA     | -1.623894781 | 1.982486371  | -2.890308828 | 0.00434341  |
| RIBC2    | 1.485050198  | 0.614154284  | 2.889863906  | 0.004349273 |
| ADGRE2   | 1.09537398   | 2.610717585  | 2.887248771  | 0.004383881 |
| PTGDS    | -1.611031583 | 2.990861914  | -2.885969164 | 0.004400907 |
| DNAAF3   | 1.168318511  | -0.143079652 | 2.883986116  | 0.004427412 |
| COL6A3   | 1.334399832  | 8.707351944  | 2.882864668  | 0.004442466 |
| NKX2-2   | -2.102275159 | -3.155795242 | -2.880145707 | 0.004479157 |
| KLC3     | 2.226180796  | 1.872121331  | 2.87918653   | 0.004492167 |
| LOX      | 1.250001117  | 5.093497846  | 2.878137262  | 0.004506438 |
| GPLD1    | -1.150768447 | 0.512404032  | -2.877677351 | 0.004512707 |
| PAK5     | -2.121140603 | -2.197445607 | -2.876606705 | 0.00452733  |
| GATA6    | -2.131221454 | 4.193923192  | -2.874875035 | 0.004551074 |
| EEPD1    | -1.106364567 | 3.94322385   | -2.874373055 | 0.004557978 |
| RASSF6   | -1.52866348  | 4.257229155  | -2.871591225 | 0.004596412 |
| HCAR3    | 1.966520824  | -0.26687091  | 2.869461324  | 0.004626039 |
| LMO3     | -1.399892883 | 0.815242103  | -2.865249884 | 0.004685134 |
| HCAR1    | -2.229913222 | -0.137480718 | -2.864530682 | 0.004695294 |
| ADAMTS20 | 2.368789072  | -1.183684541 | 2.864321726  | 0.00469825  |
| TEK      | -1.080337271 | 2.521061275  | -2.860514104 | 0.00475241  |
| SLC2A10  | -1.161990928 | 4.20095022   | -2.859388231 | 0.004768533 |
| BMP3     | -2.287331999 | -1.232654716 | -2.858717949 | 0.004778155 |
| ALDH1A1  | -2.288119293 | 6.112979623  | -2.858463826 | 0.004781808 |
| DNALI1   | -1.732845249 | 1.236714319  | -2.85783323  | 0.004790883 |
| PTPRT    | -2.063159977 | -1.274239986 | -2.8552267   | 0.004828563 |
| ZCCHC24  | -1.021807712 | 4.090644876  | -2.851281095 | 0.004886114 |
| PGGHG    | 1.153314685  | 4.695880998  | 2.850808724  | 0.004893046 |
| C2CD4B   | -2.034653394 | 1.715587251  | -2.850680899 | 0.004894923 |
| SNORC    | 1.224106046  | 1.223480664  | 2.84927631   | 0.004915595 |

|          |              |              |              |             |
|----------|--------------|--------------|--------------|-------------|
| NTF4     | 1.884293815  | -0.409354522 | 2.849061941  | 0.004918757 |
| TLE2     | -1.161750935 | 3.289062965  | -2.847106098 | 0.004947692 |
| VWA2     | -1.822433289 | 2.54178268   | -2.84710376  | 0.004947727 |
| CADPS2   | -1.223479463 | 4.28384906   | -2.84554728  | 0.004970864 |
| ASCL2    | 1.824707548  | 2.522713431  | 2.84466785   | 0.004983981 |
| ZNF69    | -1.719010939 | 1.304874155  | -2.844206972 | 0.004990868 |
| APOD     | -2.001424081 | 3.210086327  | -2.843088274 | 0.00500762  |
| ABHD2    | -1.025149381 | 7.91424409   | -2.841998731 | 0.005023985 |
| SOD3     | -1.369929959 | 4.852455963  | -2.84198546  | 0.005024184 |
| CYBRD1   | -1.242116127 | 5.827855233  | -2.841507878 | 0.005031373 |
| SEMA3E   | -2.242147569 | 0.553425339  | -2.84134483  | 0.005033829 |
| RNASE10  | 1.99203117   | -1.927103233 | 2.840274644  | 0.00504998  |
| TGFB3    | -1.083168091 | 3.387116787  | -2.839670279 | 0.005059121 |
| PIK3AP1  | 1.250048467  | 4.274959836  | 2.838477962  | 0.0050772   |
| ANKRD22  | -1.31516229  | 4.158077703  | -2.83766224  | 0.005089602 |
| SLITRK3  | -2.024357694 | -1.737825447 | -2.835378371 | 0.005124474 |
| DMRTA1   | -2.014159896 | 0.37541582   | -2.833464016 | 0.005153872 |
| HOXB13   | 2.397631645  | 0.967430296  | 2.826691507  | 0.00525911  |
| TMEM47   | -1.161578936 | 3.801564608  | -2.82543875  | 0.00527879  |
| ATP1B2   | -1.166633563 | 0.616385     | -2.824336636 | 0.005296159 |
| HOXD11   | 2.89110608   | -0.513449555 | 2.824183134  | 0.005298583 |
| ZNF682   | -1.455143823 | 0.289704783  | -2.823954815 | 0.005302189 |
| RALGAPA2 | -1.113190879 | 6.183942748  | -2.82363249  | 0.005307284 |
| PLN      | -1.969371816 | 1.542101119  | -2.820608448 | 0.005355301 |
| FAM110B  | -1.311947064 | 1.049651529  | -2.8195573   | 0.005372084 |
| CCL18    | 1.862634613  | 2.890054941  | 2.819359069  | 0.005375255 |
| RGS9     | -1.126312257 | -0.073350568 | -2.818616958 | 0.005387139 |
| ZC3H12B  | -1.303329025 | 1.419972241  | -2.81826073  | 0.005392852 |
| SMPD3    | -1.914178388 | 3.407847391  | -2.815951213 | 0.005430026 |
| SYNGR1   | -1.526567467 | 3.162878673  | -2.811373453 | 0.005504399 |
| TMEM154  | 1.592874865  | 5.073156518  | 2.809847095  | 0.005529403 |
| ACKR3    | 1.523215145  | 4.934569537  | 2.806948922  | 0.005577163 |
| GNLY     | 1.610967901  | 1.922957669  | 2.806195025  | 0.005589648 |
| IGFL2    | 1.967485022  | -0.702019952 | 2.803588067  | 0.005633018 |
| FOXL2    | 2.333670643  | -0.975095498 | 2.802741204  | 0.005647173 |
| ENKUR    | 1.307333857  | -0.267031881 | 2.802698088  | 0.005647894 |
| ZNF221   | -1.030291712 | 0.367020012  | -2.801071247 | 0.005675179 |
| WDR17    | -1.830474248 | -0.894050642 | -2.800988003 | 0.005676578 |
| FADS2    | 1.393197326  | 4.829447032  | 2.800383201  | 0.005686755 |
| TNF      | 1.46291497   | 0.213277     | 2.800022422  | 0.005692833 |
| ST8SIA2  | 1.649770708  | -1.112187595 | 2.799802078  | 0.005696548 |
| VLDLR    | -1.322465279 | 3.818065574  | -2.797910383 | 0.005728535 |
| TRIM2    | -1.024916304 | 6.786191242  | -2.797874258 | 0.005729147 |
| CEMIP    | 1.533911773  | 5.163162816  | 2.79760912   | 0.005733644 |
| ADAMTS15 | -1.550732554 | 2.460694288  | -2.794923633 | 0.005779371 |
| IFI44    | 1.191243321  | 4.887978271  | 2.793711876  | 0.005800112 |
| DSG3     | 3.833078391  | 6.193393157  | 2.793546429  | 0.005802949 |
| S100A16  | 1.131792966  | 8.038483154  | 2.791775293  | 0.005833401 |
| PTGS2    | 1.565262797  | 4.027233322  | 2.790146322  | 0.005861536 |
| TF       | -2.304531757 | 0.20994248   | -2.784639074 | 0.005957573 |
| CD9      | 1.014502938  | 8.267326631  | 2.784581074  | 0.005958592 |
| ZNF382   | -1.038502146 | 0.439703347  | -2.784354115 | 0.005962581 |
| CAPN13   | -2.36379671  | 1.32494969   | -2.783569008 | 0.005976399 |

|           |              |              |              |             |
|-----------|--------------|--------------|--------------|-------------|
| PGLYRP4   | 2.564010006  | 0.589105592  | 2.782111088  | 0.006002134 |
| RAB17     | -1.984559962 | 2.461712256  | -2.780976661 | 0.006022229 |
| ZMYND12   | -1.162689162 | -0.188069288 | -2.780495075 | 0.006030778 |
| SLC52A1   | 1.683895557  | 1.204686001  | 2.780346759  | 0.006033413 |
| PRODH     | 1.735277144  | 1.747572905  | 2.780265088  | 0.006034865 |
| NAT8L     | -1.638085555 | -0.359046683 | -2.777429538 | 0.006085457 |
| SERPINE2  | 1.51443962   | 5.130706711  | 2.776643987  | 0.00609954  |
| KIF26B    | 1.168911586  | 4.621762065  | 2.77636221   | 0.0061046   |
| HSPA6     | 1.710259729  | 2.514451783  | 2.774515994  | 0.006137841 |
| RAB38     | 1.847268118  | 3.302200487  | 2.774495327  | 0.006138214 |
| SVIP      | -1.455415902 | 3.876051714  | -2.772848469 | 0.006168007 |
| SEZ6      | -1.252900165 | -1.296117366 | -2.771559902 | 0.006191409 |
| ZNF420    | -1.112849162 | 1.699684028  | -2.770114175 | 0.006217762 |
| ZNF347    | -1.338252181 | 1.917530894  | -2.768566812 | 0.00624608  |
| SLC25A27  | -1.226474141 | 1.692859065  | -2.768040268 | 0.006255742 |
| MAL       | -3.345247319 | 1.847865845  | -2.766579294 | 0.006282625 |
| GPRC5B    | -1.484841687 | 4.198731053  | -2.766037872 | 0.006292613 |
| BSN       | -1.138236652 | 0.568359627  | -2.765752341 | 0.006297887 |
| FPR3      | 1.17471763   | 3.113137047  | 2.765692541  | 0.006298992 |
| CA3       | -1.602335591 | -0.260803487 | -2.763581102 | 0.006338121 |
| TRPV6     | -2.016480577 | 0.49357169   | -2.76183869  | 0.006370576 |
| ID4       | -1.223072191 | 3.102691688  | -2.761564338 | 0.0063757   |
| MKRN3     | 2.238828602  | 0.289927851  | 2.761131563  | 0.006383791 |
| ZNF571    | -1.099910035 | 1.213279341  | -2.760131381 | 0.006402525 |
| CCL21     | -2.272011264 | 2.535060043  | -2.757014704 | 0.006461221 |
| GNAL      | -1.096227585 | 3.109172067  | -2.756197886 | 0.006476685 |
| PTPRB     | -1.079530166 | 4.459405071  | -2.755301199 | 0.006493699 |
| ADCY2     | -1.632913009 | 0.03741487   | -2.754881463 | 0.006501677 |
| DLX5      | 2.440983821  | 1.060178585  | 2.75336001   | 0.006530672 |
| FOXF1     | -1.11368321  | 3.273514918  | -2.752728682 | 0.006542737 |
| INHBE     | 1.304027414  | -1.371554099 | 2.752674496  | 0.006543774 |
| OLFM2     | 1.472844487  | 3.266829924  | 2.752444527  | 0.006548175 |
| KIF5C     | -1.203145572 | 0.564451081  | -2.751478261 | 0.006566694 |
| GRAMD1B   | -1.819759406 | 2.89092335   | -2.751255816 | 0.006570965 |
| ADCY1     | -1.196428676 | 1.827251646  | -2.749578881 | 0.006603237 |
| SLC16A10  | -1.268771864 | 1.989404177  | -2.749042217 | 0.006613596 |
| RETREG1   | -1.496536058 | 3.656927593  | -2.749040541 | 0.006613628 |
| LRRN4CL   | -1.062727639 | 0.657690822  | -2.74757597  | 0.006641972 |
| GIMAP7    | -1.038750642 | 1.87499393   | -2.747512338 | 0.006643206 |
| SMIM10L2B | -1.158005645 | -0.218064591 | -2.745678347 | 0.00667886  |
| MYOM2     | -1.393797167 | -0.003335592 | -2.743123794 | 0.006728812 |
| FZD10     | 2.160660651  | 3.029520992  | 2.740269521  | 0.006785025 |
| NFE2L3    | 1.064491242  | 5.458708537  | 2.739158295  | 0.006807025 |
| ATP1B1    | -1.069009914 | 8.248289532  | -2.738879169 | 0.006812561 |
| PYGL      | 1.698033256  | 5.300882931  | 2.737754524  | 0.006834908 |
| RTN4RL2   | 1.010564077  | 1.730454646  | 2.737410533  | 0.006841757 |
| PID1      | -1.296965549 | 2.214633898  | -2.737331958 | 0.006843322 |
| LIMS2     | -1.112443834 | 3.802777154  | -2.736702084 | 0.006855882 |
| A4GNT     | -2.223594576 | -1.632317043 | -2.732857361 | 0.006932996 |
| PTGS1     | -1.172154298 | 4.577779123  | -2.732649247 | 0.006937193 |
| RNLS      | -1.586873691 | 1.094846251  | -2.731763024 | 0.006955089 |
| AATK      | -1.380094521 | 3.043992859  | -2.731690282 | 0.006956559 |
| DLK2      | 1.162437439  | 2.26843514   | 2.731308955  | 0.006964274 |



|          |              |              |              |             |
|----------|--------------|--------------|--------------|-------------|
| IL36G    | 3.030472718  | 0.776309229  | 2.729986592  | 0.006991087 |
| CFAP74   | 1.542630667  | -1.071586918 | 2.72966824   | 0.006997556 |
| SLCO1A2  | 2.366762555  | 0.008102942  | 2.729127478  | 0.007008557 |
| ASCL1    | -1.768030806 | -2.472162893 | -2.727536926 | 0.007041006 |
| SGK2     | -2.303735895 | 1.85830513   | -2.725815272 | 0.007076282 |
| PCSK1    | -1.650454786 | 0.686778226  | -2.725619499 | 0.007080303 |
| PDPN     | 1.356751917  | 4.94607565   | 2.725268999  | 0.007087508 |
| IGF2BP2  | 1.036190834  | 6.136792076  | 2.7240827    | 0.007111943 |
| BLK      | -1.957155221 | -0.999175705 | -2.722066528 | 0.007153647 |
| FGB      | -2.700241736 | -1.969352818 | -2.720286189 | 0.007190656 |
| CXCL9    | 1.923519602  | 4.266649307  | 2.719169162  | 0.007213965 |
| EREG     | 2.277359752  | 2.909724353  | 2.717760127  | 0.007243465 |
| ZNF569   | -1.145003518 | 0.789239276  | -2.717592721 | 0.007246977 |
| C6orf141 | 1.486042421  | 2.488016232  | 2.717447406  | 0.007250027 |
| SIGLEC10 | 1.089101061  | 2.032712254  | 2.715354902  | 0.007294073 |
| F2RL2    | 1.467479953  | 3.126088005  | 2.713688093  | 0.007329333 |
| CLDN5    | -1.127355628 | 3.07022317   | -2.712285787 | 0.007359116 |
| CD177    | 2.21708901   | 1.105614622  | 2.711720675  | 0.007371149 |
| CA9      | -2.417933007 | 2.926984867  | -2.711008032 | 0.007386349 |
| GALNT17  | -1.357871557 | 0.617588729  | -2.710367224 | 0.007400041 |
| PDE1B    | -1.124720365 | 0.798562563  | -2.709412667 | 0.00742048  |
| CORO2B   | -1.182670185 | 0.498606046  | -2.708981046 | 0.007429738 |
| AKAP6    | -1.175864161 | 2.342787667  | -2.70797967  | 0.007451258 |
| DLX2     | 1.875309073  | -0.667727838 | 2.707751765  | 0.007456164 |
| ABCC6    | -1.209835007 | 2.170064673  | -2.707111368 | 0.007469964 |
| C1QC     | 1.225346919  | 5.720922658  | 2.706015673  | 0.00749363  |
| VSNL1    | 2.253606768  | 3.942984794  | 2.705393441  | 0.007507099 |
| ENPP1    | -1.258143595 | 2.806713824  | -2.703862728 | 0.007540327 |
| PELI2    | -1.168068379 | 4.121816321  | -2.702578892 | 0.007568299 |
| SLC8A2   | -1.40207916  | -0.865524936 | -2.701355694 | 0.007595037 |
| ENOX1    | -1.039349853 | 0.471869438  | -2.700474452 | 0.007614353 |
| S100A7A  | 3.445885917  | 0.967669712  | 2.694056003  | 0.007756385 |
| GPAT3    | -1.202412378 | 2.920343311  | -2.694026685 | 0.007757039 |
| ZNF114   | 1.633193312  | 0.166960321  | 2.69352623   | 0.007768214 |
| IFFO2    | 1.147381652  | 5.836276357  | 2.693204146  | 0.007775414 |
| GRHL3    | 2.17951674   | 3.685689924  | 2.69026311   | 0.007841438 |
| IL22RA1  | 1.176148706  | 4.157628132  | 2.689008032  | 0.007869767 |
| RAB37    | -1.264389946 | 0.581329518  | -2.688840163 | 0.007873563 |
| RSAD2    | 1.318507697  | 3.920308407  | 2.688813512  | 0.007874166 |
| ZFHX2    | -1.027226424 | 1.695546471  | -2.68860419  | 0.007878902 |
| RNF152   | -1.113714976 | 4.357143387  | -2.688330668 | 0.007885095 |
| ARHGAP44 | -1.287070839 | 2.915465823  | -2.686105383 | 0.00793564  |
| SLFN11   | 1.05427592   | 4.502605542  | 2.685837255  | 0.007941749 |
| SLIT3    | -1.281707852 | 4.612477151  | -2.68476953  | 0.007966122 |
| FA2H     | -2.002797015 | 3.875159885  | -2.684476125 | 0.007972832 |
| DTNA     | -1.537357444 | 1.920986567  | -2.684010259 | 0.007983495 |
| GRIN2B   | -1.572035453 | -1.639903211 | -2.683761159 | 0.007989202 |
| GADD45G  | -1.031084345 | 1.811991276  | -2.682152714 | 0.008026142 |
| RAB27B   | -1.172433368 | 5.385010052  | -2.681347978 | 0.008044681 |
| SNAP25   | -1.567999986 | -0.461190858 | -2.680406138 | 0.008066429 |
| PRELP    | -1.736922235 | 3.442770816  | -2.67881276  | 0.008103341 |
| REG1A    | -4.411082273 | 2.148495798  | -2.677542383 | 0.00813288  |
| CSAG3    | 2.091473797  | -2.328751119 | 2.67598723   | 0.008169172 |

|           |              |              |              |             |
|-----------|--------------|--------------|--------------|-------------|
| TMEM40    | 2.751772293  | 1.892262569  | 2.675424508  | 0.00818234  |
| HTR2C     | 2.195700671  | -1.59660235  | 2.674247209  | 0.008209952 |
| H2BC18    | 1.044463922  | 1.06734428   | 2.671263852  | 0.0082803   |
| CTNNA3    | -1.791035331 | -1.348600854 | -2.667999898 | 0.008357887 |
| ODC1      | 1.121426709  | 7.526745143  | 2.664973852  | 0.008430404 |
| APOA1     | -2.072480835 | -1.193233809 | -2.663368719 | 0.0084691   |
| CCDC9B    | -1.111034944 | 3.516272578  | -2.663305512 | 0.008470627 |
| SLC14A1   | -1.468179497 | -0.449914709 | -2.662827155 | 0.008482192 |
| RAB26     | -1.131421366 | 0.805896494  | -2.660808155 | 0.00853116  |
| THSD1     | 1.029023087  | 2.556346713  | 2.658166217  | 0.008595623 |
| TMEM171   | -1.343564011 | 2.481102745  | -2.657385216 | 0.008614763 |
| GAL3ST2   | 2.004251342  | -0.24979455  | 2.657246119  | 0.008618176 |
| MESP2     | 1.450437158  | -1.052966145 | 2.656729976  | 0.008630851 |
| SLC11A1   | 1.000586595  | 3.025831766  | 2.656694384  | 0.008631726 |
| KIAA1324  | -2.331281747 | 4.872791849  | -2.65521939  | 0.008668043 |
| SLCO2A1   | -1.147365793 | 5.087354741  | -2.650590735 | 0.008782905 |
| CD109     | 1.591585815  | 5.715149357  | 2.650332896  | 0.008789344 |
| CTSF      | -1.212261762 | 3.401984044  | -2.649884123 | 0.00880056  |
| CNGA1     | -1.15469629  | 1.492157626  | -2.648403589 | 0.008837656 |
| HCK       | 1.008885635  | 3.207925657  | 2.64835075   | 0.008838983 |
| NFATC2    | -1.202558624 | 4.509253074  | -2.648204816 | 0.008842647 |
| STK33     | -1.45887474  | 0.505449251  | -2.647535226 | 0.008859479 |
| TACR1     | -1.43664424  | -0.682327566 | -2.646504752 | 0.008885439 |
| AADAC     | -2.044015744 | 1.033776957  | -2.644938563 | 0.008925026 |
| PREX2     | -1.107323986 | 2.674180367  | -2.644720993 | 0.008930538 |
| PKP1      | 3.599504703  | 6.761999096  | 2.644505518  | 0.008936    |
| LRRRC31   | -2.548812878 | -0.326003613 | -2.644448059 | 0.008937457 |
| VCAN      | 1.32867261   | 6.664523094  | 2.643293164  | 0.008966786 |
| LAMA1     | 2.039294503  | 1.709492175  | 2.642903242  | 0.008976708 |
| SMOC2     | -1.462543257 | 3.751159222  | -2.64161028  | 0.00900968  |
| COL4A4    | -1.664424989 | 1.75654965   | -2.641487038 | 0.009012828 |
| C14orf132 | -1.262143832 | 3.34116235   | -2.641286833 | 0.009017945 |
| COL14A1   | -1.300042971 | 4.44094925   | -2.637450009 | 0.009116512 |
| PERM1     | 1.165908801  | 1.348894115  | 2.634241158  | 0.00919969  |
| LIF       | 1.326016325  | 3.428125706  | 2.633171573  | 0.009227567 |
| CYP1A1    | -1.918838746 | -2.598326052 | -2.632927701 | 0.009233933 |
| GPR87     | 2.957898298  | 2.151518215  | 2.628153093  | 0.009359382 |
| HK3       | 1.190414496  | 0.878797972  | 2.627422199  | 0.00937872  |
| ANXA8     | 2.812655487  | 2.506134023  | 2.627128194  | 0.009386509 |
| APBB1     | -1.023185156 | 2.935737302  | -2.626998504 | 0.009389947 |
| DLX6      | 2.407701513  | -0.60049482  | 2.625113064  | 0.009440052 |
| CLDN6     | 2.023837583  | -1.816333183 | 2.624226949  | 0.009463684 |
| SYNM      | -1.661521478 | 4.587458462  | -2.623504094 | 0.009483001 |
| OSR1      | -1.202324371 | 1.323250557  | -2.62281487  | 0.009501453 |
| EPN3      | -1.069263754 | 5.377789246  | -2.622079885 | 0.009521165 |
| SERPINB2  | 2.836754901  | 2.563187252  | 2.62091211   | 0.00955256  |
| GSTA1     | -2.956406952 | 1.081965781  | -2.61927281  | 0.009596788 |
| TMEM170B  | -1.039844292 | 2.057564766  | -2.619262365 | 0.009597071 |
| PDZRN3    | -1.310292993 | 3.601789312  | -2.61857715  | 0.009615613 |
| NALCN     | -1.451720305 | -0.9677736   | -2.616283175 | 0.009677924 |
| ENPP2     | -1.15648352  | 3.583011241  | -2.613545927 | 0.00975275  |
| RGS20     | 1.872745347  | 0.300639354  | 2.61293079   | 0.009769637 |
| FPR2      | 1.351425649  | -0.456253899 | 2.611194817  | 0.009817436 |

|          |              |              |              |             |
|----------|--------------|--------------|--------------|-------------|
| CMPK2    | 1.054950895  | 3.962454837  | 2.608849839  | 0.009882336 |
| RIMBP2   | -1.930262348 | 0.843804479  | -2.608666492 | 0.009887427 |
| LIMCH1   | -1.115753036 | 4.07015995   | -2.608604238 | 0.009889156 |
| SLC7A7   | 1.073929892  | 3.834853334  | 2.60640465   | 0.009950421 |
| SYNPR    | -1.75764628  | -2.338151684 | -2.606236559 | 0.009955117 |
| MMP7     | 2.251364192  | 3.931523238  | 2.60549006   | 0.009975995 |
| GGT6     | -1.832390055 | 3.516232802  | -2.602585045 | 0.010057619 |
| LANCL3   | -1.12816844  | 0.739345049  | -2.602015662 | 0.010073687 |
| ZNF829   | -1.259163594 | 0.487846783  | -2.600026436 | 0.010130006 |
| ALOXE3   | 1.864332346  | 0.90679847   | 2.59946073   | 0.010146074 |
| PLEKHH1  | -1.111237884 | 4.577256342  | -2.598626701 | 0.010169804 |
| ITGA7    | -1.0534779   | 3.519935606  | -2.598117062 | 0.010184329 |
| GAST     | 1.897364667  | -1.815192034 | 2.596542679  | 0.010229319 |
| ANG      | -1.321253791 | 2.124417847  | -2.596273579 | 0.010237026 |
| USP2     | -1.106024021 | 1.688859963  | -2.594650352 | 0.01028363  |
| SLC18A1  | -1.495873529 | -2.566484957 | -2.59403263  | 0.010301415 |
| MAN1C1   | -1.023184173 | 2.818830894  | -2.593596818 | 0.010313979 |
| FYB1     | 1.174756739  | 4.302484795  | 2.593090086  | 0.010328605 |
| L3MBTL4  | -1.672731013 | 0.890387685  | -2.592745293 | 0.010338568 |
| PAPPA2   | -1.838484626 | -0.791311275 | -2.592366502 | 0.010349523 |
| H2AW     | 1.106339409  | 2.898359831  | 2.592271404  | 0.010352274 |
| APOBEC3A | 2.107330655  | 1.444511775  | 2.59212866   | 0.010356406 |
| ZNF345   | -1.208106184 | 0.634727063  | -2.591140314 | 0.010385056 |
| CYB5R2   | 1.041952821  | 3.634080293  | 2.590923082  | 0.010391363 |
| TERT     | 1.421782021  | -0.408574006 | 2.587158455  | 0.010501203 |
| ZNF43    | -1.229696912 | 2.097277619  | -2.58092373  | 0.010685405 |
| UNC93A   | 1.814993275  | -0.26159475  | 2.577298172  | 0.010793849 |
| GATA3    | 1.23948515   | 1.706146965  | 2.575041745  | 0.010861837 |
| ADAMTSL4 | -1.142590235 | 4.214085402  | -2.574450577 | 0.010879713 |
| CPA3     | -1.36491061  | 2.355327055  | -2.574396626 | 0.010881346 |
| C1QL3    | -1.29802142  | -0.439245647 | -2.574028378 | 0.010892496 |
| EPB41L4B | -1.034454362 | 4.925746453  | -2.573344745 | 0.010913223 |
| MUCL1    | 1.998987988  | -1.645336201 | 2.568166667  | 0.011071365 |
| ZNF793   | -1.426546901 | 1.231707964  | -2.567445006 | 0.011093567 |
| MTMR8    | -1.299415798 | -0.258103477 | -2.566782463 | 0.011113986 |
| SCRG1    | -1.507642291 | -0.921747145 | -2.565793318 | 0.011144533 |
| VCAM1    | 1.091654147  | 3.881962195  | 2.564705161  | 0.011178224 |
| SPARCL1  | -1.123324607 | 6.644131866  | -2.564624105 | 0.011180737 |
| NMU      | 1.32309069   | 2.367921557  | 2.564272283  | 0.011191652 |
| HTRA3    | 1.208031056  | 5.132731654  | 2.56334656   | 0.011220417 |
| PHGR1    | -3.37256596  | 0.372431605  | -2.560806027 | 0.011299699 |
| GPR50    | 2.052578719  | -2.427201142 | 2.559560717  | 0.011338744 |
| BMP5     | -1.659939358 | -1.269082209 | -2.559354122 | 0.011345233 |
| PPBP     | 1.696627661  | -1.870680584 | 2.558872431  | 0.011360376 |
| LYPD3    | 2.511571992  | 5.628708173  | 2.55801216   | 0.011387466 |
| SMIM5    | -1.337146098 | 1.599718081  | -2.5573982   | 0.011406834 |
| KCNK15   | -1.681322214 | 1.014999931  | -2.556847266 | 0.01142424  |
| FAM221A  | -1.350515426 | 2.975767298  | -2.556637144 | 0.011430884 |
| LZTS1    | 1.063596457  | 3.268814613  | 2.555906585  | 0.011454013 |
| PLAC1    | 1.502321487  | -1.131356477 | 2.555676119  | 0.011461318 |
| LAMP5    | 1.533112101  | 0.237614484  | 2.554513741  | 0.011498226 |
| MYO5C    | -1.372532868 | 5.077943412  | -2.553592132 | 0.011527564 |
| CABYR    | 1.364151384  | 1.769708143  | 2.551493223  | 0.01159463  |

|          |              |              |              |             |
|----------|--------------|--------------|--------------|-------------|
| PLEKHA6  | -1.930431513 | 4.983934963  | -2.550324851 | 0.011632114 |
| IL2RB    | 1.000413173  | 3.76895325   | 2.54943856   | 0.01166062  |
| ADAMTS1  | -1.120846814 | 5.106749194  | -2.549377473 | 0.011662587 |
| HOXD13   | 2.715237891  | -0.736467111 | 2.54857655   | 0.011688406 |
| MS4A8    | -2.459412282 | -0.970527735 | -2.548377762 | 0.011694822 |
| TACR2    | -1.340841413 | 0.820301274  | -2.548263898 | 0.011698498 |
| RGS5     | -1.18703936  | 6.715062463  | -2.54807092  | 0.011704732 |
| LIPH     | -1.6981792   | 4.544668197  | -2.547973698 | 0.011707873 |
| PADI3    | 2.450253559  | 1.072388327  | 2.547430749  | 0.011725431 |
| APOBEC3G | 1.028236157  | 3.121076433  | 2.546271771  | 0.011762988 |
| CDK5R1   | 1.171728727  | 2.980499551  | 2.542632649  | 0.011881616 |
| SMIM6    | -2.060127725 | -0.190199169 | -2.542363063 | 0.011890446 |
| NTM      | 1.208402967  | 1.987776723  | 2.540926385  | 0.011937604 |
| CHD5     | -1.489611864 | -0.392177973 | -2.537979531 | 0.012034856 |
| TFCP2L1  | -1.185150575 | 5.522030404  | -2.537624513 | 0.01204662  |
| UBD      | 1.911888155  | 1.6997032    | 2.533632293  | 0.012179617 |
| FFAR2    | 1.298011613  | -0.045519043 | 2.533094291  | 0.01219764  |
| ACP7     | 2.001120812  | -0.756329395 | 2.53284907   | 0.012205863 |
| FMO1     | 1.28274717   | 0.971027493  | 2.532497696  | 0.012217654 |
| SOX21    | -2.375169082 | 1.752857588  | -2.529322937 | 0.012324651 |
| IGSF9    | 1.094374103  | 5.403121091  | 2.528767498  | 0.012343457 |
| FGFBP1   | 2.686402925  | 4.427523051  | 2.527785578  | 0.012376764 |
| MYOM3    | 1.474931346  | 1.76318067   | 2.527577476  | 0.012383834 |
| C1QTNF12 | 1.291504567  | 1.197993338  | 2.526835536  | 0.012409067 |
| KCND3    | -1.374943251 | 3.352213753  | -2.525917855 | 0.012440341 |
| HPSE2    | -1.833643114 | -0.414290737 | -2.524320134 | 0.012494958 |
| PODN     | -1.392190306 | 3.663532171  | -2.521977007 | 0.012575443 |
| LTF      | -2.496892333 | 1.946191116  | -2.521953381 | 0.012576257 |
| GP2      | -2.97668981  | -0.430001695 | -2.517468497 | 0.012731613 |
| NKX2-8   | 1.943196017  | -1.159140481 | 2.517318439  | 0.01273684  |
| PLXNA4   | -1.3836143   | 1.556171275  | -2.514631135 | 0.012830781 |
| TPSB2    | -1.375259479 | 2.316879721  | -2.513516    | 0.012869944 |
| AGMAT    | 1.401446292  | 2.604760393  | 2.51348444   | 0.012871054 |
| WNT10A   | 1.618684969  | 2.609337392  | 2.513369465  | 0.012875098 |
| TMEM52B  | 1.373044493  | -0.820670388 | 2.513305576  | 0.012877346 |
| CDO1     | -1.601059339 | -1.12214296  | -2.512818089 | 0.012894509 |
| ZNF556   | 1.347802496  | 0.132714913  | 2.511974035  | 0.012924273 |
| CAMK2B   | -1.502635347 | -0.571191064 | -2.511191719 | 0.012951916 |
| PTPRS    | -1.370549234 | 5.89215517   | -2.510915055 | 0.012961704 |
| SHISA9   | -1.790857972 | -1.989918355 | -2.509939768 | 0.012996261 |
| PBX1     | -1.014576599 | 5.586647929  | -2.509254129 | 0.013020605 |
| CYP2C18  | -1.825115339 | 2.425098075  | -2.508285079 | 0.013055081 |
| GATM     | -1.49420861  | 5.053725305  | -2.508143751 | 0.013060115 |
| C1QB     | 1.228277039  | 5.802988408  | 2.507894737  | 0.013068991 |
| GZMB     | 1.155998649  | 1.95031652   | 2.506434406  | 0.013121148 |
| TESC     | -2.280257549 | 2.337149222  | -2.505721119 | 0.013146691 |
| GJB6     | 3.173134477  | 3.556459966  | 2.504952127  | 0.013174278 |
| MACROD2  | -1.519434466 | 1.049085956  | -2.503818905 | 0.013215027 |
| EFCC1    | -1.056352506 | 1.14464112   | -2.501929237 | 0.013283226 |
| TCHH     | 1.87610427   | 0.414174754  | 2.501360364  | 0.013303818 |
| ZNF257   | -1.252347856 | -1.132324286 | -2.499756015 | 0.013362046 |
| ACKR2    | -1.102722333 | 0.696701052  | -2.496907182 | 0.013466002 |
| RGS2     | -1.052578479 | 4.814730487  | -2.496847634 | 0.013468182 |

|          |              |              |              |             |
|----------|--------------|--------------|--------------|-------------|
| SLC7A9   | 1.450481926  | -0.940663743 | 2.494359457  | 0.013559579 |
| NTN1     | -1.302188568 | 4.571935465  | -2.494150635 | 0.013567275 |
| LPIN2    | -1.096875283 | 5.714115148  | -2.491261139 | 0.013674161 |
| ZNF577   | -1.003973435 | 1.877379872  | -2.490379562 | 0.013706921 |
| KRT20    | -3.353943239 | 0.704071665  | -2.488607605 | 0.013772979 |
| ANO1     | 1.418094344  | 7.115995825  | 2.488324218  | 0.01378357  |
| EEF1A2   | -2.024461826 | 0.981942519  | -2.487727416 | 0.013805897 |
| ARHGAP23 | 1.032827354  | 6.864124465  | 2.486589994  | 0.01384854  |
| TMEM35A  | -1.524367769 | -1.012319313 | -2.486310745 | 0.013859027 |
| LRRC17   | -1.498626418 | 1.286714547  | -2.486065032 | 0.013868261 |
| DOK7     | -1.3522275   | 0.71534742   | -2.485256144 | 0.013898696 |
| EGF      | 1.755122292  | -0.485967579 | 2.484326067  | 0.013933765 |
| EN1      | 2.810958389  | -0.4040465   | 2.483764747  | 0.013954968 |
| FEZF1    | 1.892347717  | -0.625974815 | 2.481182234  | 0.014052889 |
| SLC7A2   | -1.593064196 | 3.435109267  | -2.480533089 | 0.014077598 |
| LYPD5    | 1.225985525  | 2.957400589  | 2.479814398  | 0.014105    |
| IDO1     | 1.88491979   | 2.838427541  | 2.477301064  | 0.014201201 |
| TBX4     | 1.500393541  | -0.979962787 | 2.475151921  | 0.014283925 |
| FGF11    | 1.348674849  | -0.244012394 | 2.475054658  | 0.014287679 |
| BTBD16   | 1.257248194  | -0.617844267 | 2.474494745  | 0.014309306 |
| H2BC4    | 1.073464124  | 1.674139341  | 2.472551688  | 0.014384585 |
| THBS2    | 1.328581821  | 6.310121578  | 2.471247636  | 0.014435304 |
| BIRC7    | 1.39849032   | -2.270399389 | 2.470276442  | 0.014473181 |
| DUOX1    | -1.349346029 | 5.96894375   | -2.470047783 | 0.014482112 |
| OMD      | -1.61387356  | 0.234331446  | -2.46940308  | 0.014507318 |
| KIF19    | -1.261525556 | -0.847823228 | -2.468184491 | 0.014555068 |
| HOXC12   | 2.389993061  | -0.988463627 | 2.468145734  | 0.014556589 |
| COL8A1   | 1.365145877  | 4.724510604  | 2.465026597  | 0.01467946  |
| FOXC2    | 1.562520459  | 1.009267083  | 2.463104774  | 0.014755625 |
| SP5      | -1.990398521 | 0.234267815  | -2.460634247 | 0.014854051 |
| SMIM24   | -2.781739218 | 1.593232241  | -2.460577375 | 0.014856323 |
| STK31    | 1.330070538  | 1.935962422  | 2.459433122  | 0.014902114 |
| ALOX15   | 1.902662659  | -0.631667024 | 2.459263372  | 0.014908918 |
| SAMD11   | -1.118226945 | 0.781780928  | -2.458076    | 0.014956586 |
| CTF1     | -1.096096357 | 2.317086648  | -2.457725783 | 0.014970672 |
| SVEP1    | -1.01106046  | 3.597297791  | -2.457648431 | 0.014973785 |
| NIBAN1   | -1.06689386  | 5.786481388  | -2.453666247 | 0.015134808 |
| ELOVL5   | 1.115911149  | 5.369307391  | 2.453301442  | 0.015149636 |
| PGR      | -1.254151119 | 0.230513047  | -2.453287186 | 0.015150216 |
| ZNF229   | -1.524985604 | 0.090709238  | -2.44756626  | 0.01538445  |
| FGF19    | 2.524201724  | -0.775282802 | 2.445218751  | 0.015481492 |
| VWA7     | -1.030409059 | 2.328975322  | -2.443962012 | 0.015533666 |
| LGALS9B  | -1.549020115 | 0.643284993  | -2.443154375 | 0.015567278 |
| CRABP2   | 1.762258699  | 4.671984763  | 2.442473737  | 0.015595655 |
| MAGEA6   | 3.039652218  | -0.497888565 | 2.438383258  | 0.015767161 |
| ZNF71    | -1.038245524 | 1.62618828   | -2.438326288 | 0.015769562 |
| ZBED2    | 1.877808391  | 1.145687602  | 2.437819026  | 0.015790949 |
| NPAS3    | -1.240928831 | -0.371487987 | -2.435600412 | 0.015884795 |
| VGLL1    | 1.711897132  | -0.556255388 | 2.43494912   | 0.015912438 |
| CYP3A5   | -2.005300131 | 4.171749301  | -2.434724945 | 0.015921963 |
| CAND2    | -1.183215343 | 1.278945765  | -2.433583952 | 0.015970519 |
| SPINK1   | -3.215516159 | 2.695734906  | -2.433458521 | 0.015975865 |
| XPNPEP2  | -1.992964167 | -0.121208442 | -2.432790442 | 0.016004365 |

|          |              |              |              |             |
|----------|--------------|--------------|--------------|-------------|
| CHRD     | -1.000778958 | 1.768255793  | -2.431903504 | 0.016042271 |
| ZDHHC11B | -1.327836519 | 2.503854551  | -2.431550047 | 0.0160574   |
| RAMP1    | -1.35188326  | 2.591232164  | -2.429930779 | 0.016126868 |
| AKAP12   | -1.19295073  | 4.61310417   | -2.429592856 | 0.016141399 |
| NETO2    | 1.146661904  | 4.336007032  | 2.429314288  | 0.016153386 |
| CACNA1H  | -1.177219564 | 4.155104829  | -2.429163066 | 0.016159897 |
| HBA2     | -1.327678876 | 1.889223201  | -2.428546668 | 0.016186459 |
| SLC38A3  | -1.631431769 | -0.973966601 | -2.428004101 | 0.016209872 |
| NOX1     | 1.442555767  | 0.534774568  | 2.42622837   | 0.016286708 |
| SLCO1B3  | 2.227052106  | -0.28588103  | 2.42560059   | 0.016313949 |
| KCND2    | 1.30850872   | 0.009867242  | 2.425600425  | 0.016313956 |
| XCL1     | 1.317339618  | -0.191259808 | 2.422048912  | 0.016468828 |

| adj.P.Val | B           |
|-----------|-------------|
| 2.67E-21  | 47.15268277 |
| 4.42E-19  | 41.23767422 |
| 4.42E-19  | 41.08796465 |
| 1.39E-18  | 39.68301256 |
| 3.48E-18  | 38.56994544 |
| 8.76E-18  | 37.48997857 |
| 1.36E-17  | 36.78534512 |
| 1.36E-17  | 36.78170499 |
| 1.59E-17  | 36.51384959 |
| 1.84E-17  | 36.26628381 |
| 1.86E-17  | 36.16218154 |
| 1.90E-17  | 35.99881347 |
| 1.90E-17  | 35.9784225  |
| 2.09E-17  | 35.81408869 |
| 2.20E-17  | 35.69410235 |
| 2.95E-17  | 35.31051073 |
| 2.95E-17  | 35.2866884  |
| 3.59E-17  | 35.03920133 |
| 3.61E-17  | 34.97954136 |
| 4.81E-17  | 34.64920179 |
| 9.98E-17  | 33.88778854 |
| 1.13E-16  | 33.7245293  |
| 1.16E-16  | 33.65202209 |
| 1.66E-16  | 33.25931499 |
| 1.73E-16  | 33.162992   |
| 1.73E-16  | 33.12891683 |
| 1.73E-16  | 33.0747525  |
| 1.73E-16  | 33.0693346  |
| 1.79E-16  | 32.99711226 |
| 1.79E-16  | 32.96704205 |
| 2.04E-16  | 32.80717321 |
| 2.05E-16  | 32.77093952 |
| 2.05E-16  | 32.70933953 |
| 2.05E-16  | 32.70086807 |
| 2.05E-16  | 32.68285037 |
| 2.35E-16  | 32.52346381 |
| 2.43E-16  | 32.46461458 |
| 3.35E-16  | 32.12489784 |
| 5.11E-16  | 31.68644409 |
| 8.26E-16  | 31.19331002 |
| 9.96E-16  | 30.98589247 |
| 1.12E-15  | 30.84783062 |
| 1.19E-15  | 30.76731896 |
| 3.13E-15  | 29.77682546 |
| 3.13E-15  | 29.77650211 |
| 3.16E-15  | 29.73853961 |
| 3.16E-15  | 29.70701036 |
| 3.16E-15  | 29.70453329 |
| 3.22E-15  | 29.65835804 |
| 3.22E-15  | 29.64478311 |

|          |             |
|----------|-------------|
| 3.22E-15 | 29.62742169 |
| 4.11E-15 | 29.36968834 |
| 5.65E-15 | 29.03914007 |
| 6.13E-15 | 28.93465427 |
| 6.13E-15 | 28.92307525 |
| 6.22E-15 | 28.87445813 |
| 6.22E-15 | 28.87370484 |
| 6.24E-15 | 28.85466015 |
| 8.19E-15 | 28.57159737 |
| 8.21E-15 | 28.55326055 |
| 8.95E-15 | 28.45229997 |
| 9.12E-15 | 28.41878166 |
| 9.35E-15 | 28.37840317 |
| 9.44E-15 | 28.34580462 |
| 9.44E-15 | 28.33836326 |
| 1.43E-14 | 27.91617363 |
| 1.47E-14 | 27.87897073 |
| 1.78E-14 | 27.67394782 |
| 1.82E-14 | 27.63880277 |
| 2.23E-14 | 27.42662063 |
| 2.27E-14 | 27.39382401 |
| 3.05E-14 | 27.09223951 |
| 3.05E-14 | 27.07839788 |
| 3.15E-14 | 27.03383904 |
| 3.27E-14 | 26.98396809 |
| 3.27E-14 | 26.97287739 |
| 3.37E-14 | 26.92973111 |
| 3.40E-14 | 26.90934126 |
| 3.58E-14 | 26.84583505 |
| 3.75E-14 | 26.78865837 |
| 3.77E-14 | 26.77145957 |
| 4.58E-14 | 26.56820443 |
| 4.76E-14 | 26.51734496 |
| 4.76E-14 | 26.49271795 |
| 4.76E-14 | 26.48542514 |
| 4.76E-14 | 26.47447159 |
| 4.76E-14 | 26.47365953 |
| 4.87E-14 | 26.44085445 |
| 5.50E-14 | 26.31097512 |
| 5.50E-14 | 26.29999399 |
| 7.03E-14 | 26.04846227 |
| 7.16E-14 | 26.02082589 |
| 8.96E-14 | 25.79092006 |
| 9.17E-14 | 25.75791689 |
| 9.17E-14 | 25.74796689 |
| 9.41E-14 | 25.70898481 |
| 9.41E-14 | 25.70239632 |
| 9.73E-14 | 25.65941921 |
| 1.03E-13 | 25.59536568 |
| 1.07E-13 | 25.54264206 |
| 1.10E-13 | 25.51120752 |
| 1.26E-13 | 25.36885504 |
| 1.54E-13 | 25.16368311 |



|          |             |
|----------|-------------|
| 1.67E-13 | 25.06413838 |
| 1.67E-13 | 25.05772373 |
| 1.67E-13 | 25.05300338 |
| 1.72E-13 | 25.01735713 |
| 1.82E-13 | 24.95424053 |
| 1.83E-13 | 24.9361263  |
| 2.37E-13 | 24.67872907 |
| 2.43E-13 | 24.64352311 |
| 2.68E-13 | 24.54010717 |
| 2.80E-13 | 24.48869162 |
| 2.91E-13 | 24.44145831 |
| 2.99E-13 | 24.40846737 |
| 2.99E-13 | 24.39907803 |
| 3.10E-13 | 24.35430948 |
| 3.56E-13 | 24.21096933 |
| 3.77E-13 | 24.14887666 |
| 5.26E-13 | 23.81516014 |
| 5.69E-13 | 23.72895241 |
| 6.31E-13 | 23.62070681 |
| 6.69E-13 | 23.55549941 |
| 7.10E-13 | 23.48997444 |
| 7.41E-13 | 23.44077909 |
| 9.50E-13 | 23.19039954 |
| 1.17E-12 | 22.97516433 |
| 1.24E-12 | 22.91616934 |
| 1.61E-12 | 22.65087505 |
| 1.78E-12 | 22.54680857 |
| 2.72E-12 | 22.12403865 |
| 2.72E-12 | 22.11736645 |
| 2.89E-12 | 22.05098124 |
| 2.94E-12 | 22.02655868 |
| 3.14E-12 | 21.95644216 |
| 3.23E-12 | 21.92195138 |
| 3.28E-12 | 21.89983222 |
| 3.30E-12 | 21.88792745 |
| 3.76E-12 | 21.75185086 |
| 4.00E-12 | 21.68452942 |
| 4.36E-12 | 21.59414283 |
| 4.61E-12 | 21.53232322 |
| 4.70E-12 | 21.506821   |
| 5.68E-12 | 21.31536242 |
| 6.31E-12 | 21.20566203 |
| 7.19E-12 | 21.0726663  |
| 7.44E-12 | 21.03211365 |
| 8.17E-12 | 20.93421026 |
| 8.43E-12 | 20.89705039 |
| 8.59E-12 | 20.8726324  |
| 1.29E-11 | 20.47002303 |
| 1.36E-11 | 20.41365192 |
| 1.53E-11 | 20.29089772 |
| 2.43E-11 | 19.83173517 |
| 2.54E-11 | 19.78487163 |
| 2.62E-11 | 19.74822882 |

|          |             |
|----------|-------------|
| 2.63E-11 | 19.73596752 |
| 2.75E-11 | 19.68866651 |
| 3.07E-11 | 19.57561304 |
| 3.10E-11 | 19.560033   |
| 3.21E-11 | 19.51766779 |
| 3.49E-11 | 19.43152311 |
| 3.58E-11 | 19.3992883  |
| 3.65E-11 | 19.37447915 |
| 3.74E-11 | 19.34563581 |
| 4.18E-11 | 19.23226755 |
| 5.40E-11 | 18.97612909 |
| 5.89E-11 | 18.8816043  |
| 5.89E-11 | 18.87807488 |
| 5.89E-11 | 18.8745244  |
| 5.89E-11 | 18.86838696 |
| 6.15E-11 | 18.82084772 |
| 7.07E-11 | 18.67976296 |
| 7.25E-11 | 18.64926886 |
| 7.45E-11 | 18.61797435 |
| 7.62E-11 | 18.59021578 |
| 8.31E-11 | 18.49949175 |
| 1.07E-10 | 18.25069205 |
| 1.20E-10 | 18.12809782 |
| 1.31E-10 | 18.04010912 |
| 1.39E-10 | 17.97695977 |
| 1.42E-10 | 17.953084   |
| 1.43E-10 | 17.93851149 |
| 1.44E-10 | 17.92521881 |
| 1.48E-10 | 17.89364352 |
| 1.49E-10 | 17.88374431 |
| 1.54E-10 | 17.84397685 |
| 1.75E-10 | 17.71369128 |
| 1.91E-10 | 17.62511257 |
| 2.12E-10 | 17.51826085 |
| 2.21E-10 | 17.47379989 |
| 2.55E-10 | 17.33058571 |
| 2.57E-10 | 17.31538053 |
| 2.62E-10 | 17.29458168 |
| 2.78E-10 | 17.22981886 |
| 2.94E-10 | 17.17212591 |
| 3.89E-10 | 16.89281446 |
| 4.07E-10 | 16.84491548 |
| 4.41E-10 | 16.76091278 |
| 4.43E-10 | 16.75142277 |
| 4.56E-10 | 16.71957411 |
| 5.42E-10 | 16.54687932 |
| 5.55E-10 | 16.5176782  |
| 5.84E-10 | 16.46450387 |
| 5.96E-10 | 16.43912814 |
| 6.05E-10 | 16.41966488 |
| 6.14E-10 | 16.40100125 |
| 6.76E-10 | 16.30320211 |
| 7.64E-10 | 16.17922066 |

|          |             |
|----------|-------------|
| 7.80E-10 | 16.15403809 |
| 7.89E-10 | 16.1382555  |
| 7.99E-10 | 16.12130302 |
| 8.77E-10 | 16.02642897 |
| 9.99E-10 | 15.8959152  |
| 9.99E-10 | 15.89138398 |
| 1.08E-09 | 15.80691664 |
| 1.09E-09 | 15.79450556 |
| 1.13E-09 | 15.75347358 |
| 1.18E-09 | 15.71168006 |
| 1.18E-09 | 15.7043979  |
| 1.18E-09 | 15.70243259 |
| 1.19E-09 | 15.68571589 |
| 1.31E-09 | 15.5926388  |
| 1.31E-09 | 15.58548254 |
| 1.34E-09 | 15.55905248 |
| 1.40E-09 | 15.51566962 |
| 1.50E-09 | 15.44000045 |
| 1.50E-09 | 15.43974677 |
| 1.64E-09 | 15.34125474 |
| 1.72E-09 | 15.29370232 |
| 1.75E-09 | 15.2707558  |
| 1.75E-09 | 15.26778046 |
| 1.97E-09 | 15.14954844 |
| 2.07E-09 | 15.09611877 |
| 2.11E-09 | 15.07416921 |
| 2.11E-09 | 15.06853806 |
| 2.22E-09 | 15.01707824 |
| 2.54E-09 | 14.88278092 |
| 2.83E-09 | 14.77091212 |
| 2.87E-09 | 14.75392315 |
| 2.93E-09 | 14.73051135 |
| 3.11E-09 | 14.66704649 |
| 3.36E-09 | 14.58780297 |
| 3.43E-09 | 14.56489262 |
| 3.49E-09 | 14.544634   |
| 3.58E-09 | 14.51579197 |
| 3.59E-09 | 14.50930043 |
| 3.66E-09 | 14.48776189 |
| 3.72E-09 | 14.46660025 |
| 4.01E-09 | 14.39116611 |
| 4.37E-09 | 14.30260313 |
| 4.69E-09 | 14.23085122 |
| 5.39E-09 | 14.09099053 |
| 5.61E-09 | 14.04856681 |
| 5.67E-09 | 14.03376694 |
| 6.03E-09 | 13.97076458 |
| 6.41E-09 | 13.90781925 |
| 7.05E-09 | 13.8084293  |
| 7.23E-09 | 13.77924039 |
| 7.51E-09 | 13.73949521 |
| 7.59E-09 | 13.72459274 |
| 8.11E-09 | 13.65673036 |

|          |             |
|----------|-------------|
| 1.00E-08 | 13.44949593 |
| 1.07E-08 | 13.37931583 |
| 1.15E-08 | 13.30784755 |
| 1.16E-08 | 13.29617995 |
| 1.16E-08 | 13.2936845  |
| 1.19E-08 | 13.2659183  |
| 1.21E-08 | 13.24682576 |
| 1.25E-08 | 13.21152818 |
| 1.26E-08 | 13.19447116 |
| 1.27E-08 | 13.18798503 |
| 1.31E-08 | 13.15141432 |
| 1.33E-08 | 13.12980657 |
| 1.33E-08 | 13.1295983  |
| 1.35E-08 | 13.11567806 |
| 1.42E-08 | 13.06036852 |
| 1.51E-08 | 12.99815682 |
| 1.51E-08 | 12.99180918 |
| 1.53E-08 | 12.97789459 |
| 1.55E-08 | 12.962931   |
| 1.58E-08 | 12.9374569  |
| 1.63E-08 | 12.90753456 |
| 1.65E-08 | 12.89307862 |
| 1.68E-08 | 12.87209166 |
| 1.68E-08 | 12.86635676 |
| 1.69E-08 | 12.85981449 |
| 1.74E-08 | 12.82786035 |
| 1.74E-08 | 12.82342252 |
| 1.75E-08 | 12.81578962 |
| 1.79E-08 | 12.78724987 |
| 1.82E-08 | 12.77038975 |
| 1.92E-08 | 12.71090763 |
| 1.92E-08 | 12.70775311 |
| 1.96E-08 | 12.68334165 |
| 2.07E-08 | 12.62695753 |
| 2.09E-08 | 12.61264689 |
| 2.09E-08 | 12.61084836 |
| 2.10E-08 | 12.6047498  |
| 2.15E-08 | 12.57846322 |
| 2.16E-08 | 12.57048562 |
| 2.17E-08 | 12.56057023 |
| 2.32E-08 | 12.49363919 |
| 2.40E-08 | 12.45837079 |
| 2.44E-08 | 12.43960181 |
| 2.47E-08 | 12.42313642 |
| 2.62E-08 | 12.36345706 |
| 2.64E-08 | 12.35361882 |
| 3.10E-08 | 12.19181031 |
| 3.15E-08 | 12.17305252 |
| 3.15E-08 | 12.16986464 |
| 3.18E-08 | 12.15788992 |
| 3.23E-08 | 12.13921662 |
| 3.39E-08 | 12.09038238 |
| 3.43E-08 | 12.07617581 |

|          |             |
|----------|-------------|
| 3.52E-08 | 12.04605204 |
| 3.61E-08 | 12.02041898 |
| 3.97E-08 | 11.92422925 |
| 4.02E-08 | 11.9096898  |
| 4.05E-08 | 11.89837561 |
| 4.88E-08 | 11.71228664 |
| 5.17E-08 | 11.65321365 |
| 5.20E-08 | 11.64289131 |
| 5.20E-08 | 11.64154871 |
| 5.41E-08 | 11.60028426 |
| 5.42E-08 | 11.59626287 |
| 5.62E-08 | 11.55847246 |
| 5.70E-08 | 11.53868158 |
| 5.75E-08 | 11.52670183 |
| 5.87E-08 | 11.5039456  |
| 6.32E-08 | 11.42935569 |
| 6.38E-08 | 11.41789119 |
| 6.60E-08 | 11.3814315  |
| 6.66E-08 | 11.36994745 |
| 6.93E-08 | 11.32892773 |
| 7.05E-08 | 11.31026385 |
| 7.27E-08 | 11.27732524 |
| 7.29E-08 | 11.27202435 |
| 7.70E-08 | 11.21252501 |
| 7.81E-08 | 11.19621537 |
| 8.10E-08 | 11.15869618 |
| 8.17E-08 | 11.1470253  |
| 8.39E-08 | 11.11832094 |
| 8.39E-08 | 11.11600579 |
| 8.41E-08 | 11.11058456 |
| 8.82E-08 | 11.05884856 |
| 9.36E-08 | 10.99933666 |
| 9.39E-08 | 10.99364391 |
| 9.85E-08 | 10.94400254 |
| 1.08E-07 | 10.85187518 |
| 1.14E-07 | 10.80136518 |
| 1.14E-07 | 10.79344762 |
| 1.14E-07 | 10.79334761 |
| 1.15E-07 | 10.78340627 |
| 1.15E-07 | 10.7815486  |
| 1.15E-07 | 10.77191235 |
| 1.16E-07 | 10.76768371 |
| 1.18E-07 | 10.74445429 |
| 1.18E-07 | 10.74231255 |
| 1.18E-07 | 10.73616121 |
| 1.20E-07 | 10.71917142 |
| 1.22E-07 | 10.70084994 |
| 1.23E-07 | 10.69265964 |
| 1.27E-07 | 10.65232954 |
| 1.27E-07 | 10.6501993  |
| 1.31E-07 | 10.62054659 |
| 1.36E-07 | 10.58511022 |
| 1.37E-07 | 10.57578923 |

|          |             |
|----------|-------------|
| 1.38E-07 | 10.56293427 |
| 1.47E-07 | 10.50107822 |
| 1.50E-07 | 10.47602361 |
| 1.51E-07 | 10.46823212 |
| 1.54E-07 | 10.44769203 |
| 1.61E-07 | 10.39564714 |
| 1.65E-07 | 10.37193218 |
| 1.65E-07 | 10.3672817  |
| 1.67E-07 | 10.34854037 |
| 1.69E-07 | 10.33420506 |
| 1.70E-07 | 10.32941109 |
| 1.74E-07 | 10.30497569 |
| 1.76E-07 | 10.28861515 |
| 1.97E-07 | 10.18045142 |
| 1.98E-07 | 10.16860791 |
| 1.98E-07 | 10.16828099 |
| 2.01E-07 | 10.15097732 |
| 2.02E-07 | 10.14425604 |
| 2.04E-07 | 10.13365504 |
| 2.12E-07 | 10.09250795 |
| 2.12E-07 | 10.08565378 |
| 2.12E-07 | 10.08533869 |
| 2.14E-07 | 10.07479924 |
| 2.30E-07 | 10.003568   |
| 2.40E-07 | 9.952655084 |
| 2.40E-07 | 9.952075866 |
| 2.44E-07 | 9.933192979 |
| 2.52E-07 | 9.900652627 |
| 2.53E-07 | 9.894589362 |
| 2.54E-07 | 9.886490855 |
| 2.55E-07 | 9.881483529 |
| 2.57E-07 | 9.868045752 |
| 2.57E-07 | 9.867031414 |
| 2.63E-07 | 9.842593477 |
| 2.86E-07 | 9.76156463  |
| 2.89E-07 | 9.747928219 |
| 2.95E-07 | 9.726086091 |
| 3.16E-07 | 9.658374094 |
| 3.20E-07 | 9.642472173 |
| 3.35E-07 | 9.596249884 |
| 3.35E-07 | 9.594271429 |
| 3.39E-07 | 9.579712083 |
| 3.47E-07 | 9.554349276 |
| 3.64E-07 | 9.50628773  |
| 3.64E-07 | 9.505868969 |
| 3.80E-07 | 9.460421416 |
| 3.86E-07 | 9.444353398 |
| 3.86E-07 | 9.442307814 |
| 3.87E-07 | 9.437581793 |
| 3.87E-07 | 9.434583046 |
| 3.91E-07 | 9.419342777 |
| 3.91E-07 | 9.419018448 |
| 3.94E-07 | 9.41113778  |

|          |             |
|----------|-------------|
| 4.36E-07 | 9.307590089 |
| 4.37E-07 | 9.304528318 |
| 4.42E-07 | 9.290578297 |
| 4.54E-07 | 9.263297198 |
| 4.55E-07 | 9.257925547 |
| 4.61E-07 | 9.244339568 |
| 4.75E-07 | 9.209733075 |
| 4.93E-07 | 9.171309764 |
| 5.21E-07 | 9.115605852 |
| 5.21E-07 | 9.113783236 |
| 5.25E-07 | 9.105325842 |
| 5.27E-07 | 9.099263494 |
| 5.45E-07 | 9.06451874  |
| 5.52E-07 | 9.049714596 |
| 5.69E-07 | 9.018858356 |
| 5.73E-07 | 9.01053923  |
| 6.22E-07 | 8.929288522 |
| 6.34E-07 | 8.906476699 |
| 6.64E-07 | 8.859032533 |
| 6.79E-07 | 8.835447355 |
| 6.88E-07 | 8.818138836 |
| 7.23E-07 | 8.768602862 |
| 7.62E-07 | 8.716440295 |
| 7.68E-07 | 8.706065482 |
| 7.93E-07 | 8.673268233 |
| 8.13E-07 | 8.645582827 |
| 8.21E-07 | 8.632436397 |
| 8.21E-07 | 8.631231971 |
| 8.36E-07 | 8.609995116 |
| 8.36E-07 | 8.60958731  |
| 8.58E-07 | 8.581024273 |
| 8.60E-07 | 8.576091819 |
| 8.67E-07 | 8.566860864 |
| 8.79E-07 | 8.550791506 |
| 8.99E-07 | 8.526257194 |
| 8.99E-07 | 8.525594818 |
| 9.33E-07 | 8.485510019 |
| 9.68E-07 | 8.447786826 |
| 9.88E-07 | 8.424741905 |
| 1.04E-06 | 8.373478099 |
| 1.19E-06 | 8.236992755 |
| 1.21E-06 | 8.220154443 |
| 1.21E-06 | 8.215592113 |
| 1.22E-06 | 8.212600084 |
| 1.27E-06 | 8.169666121 |
| 1.28E-06 | 8.156230633 |
| 1.30E-06 | 8.141462273 |
| 1.31E-06 | 8.129466084 |
| 1.34E-06 | 8.106162322 |
| 1.36E-06 | 8.087826503 |
| 1.37E-06 | 8.078088194 |
| 1.41E-06 | 8.050886183 |
| 1.41E-06 | 8.05074632  |

|          |             |
|----------|-------------|
| 1.47E-06 | 8.009242352 |
| 1.50E-06 | 7.98689303  |
| 1.58E-06 | 7.935096572 |
| 1.62E-06 | 7.909143503 |
| 1.67E-06 | 7.877194276 |
| 1.67E-06 | 7.87385526  |
| 1.76E-06 | 7.822966813 |
| 1.77E-06 | 7.809922751 |
| 1.80E-06 | 7.794229333 |
| 1.80E-06 | 7.792880613 |
| 1.81E-06 | 7.785211858 |
| 1.84E-06 | 7.767295357 |
| 1.84E-06 | 7.764396249 |
| 1.89E-06 | 7.73503406  |
| 1.89E-06 | 7.731794658 |
| 1.89E-06 | 7.731237597 |
| 1.93E-06 | 7.713690345 |
| 1.93E-06 | 7.711182688 |
| 1.95E-06 | 7.695250356 |
| 2.00E-06 | 7.66388789  |
| 2.00E-06 | 7.662122529 |
| 2.00E-06 | 7.661160635 |
| 2.06E-06 | 7.634300887 |
| 2.09E-06 | 7.618640867 |
| 2.21E-06 | 7.560316185 |
| 2.24E-06 | 7.544519231 |
| 2.29E-06 | 7.520224357 |
| 2.30E-06 | 7.516356716 |
| 2.32E-06 | 7.506299892 |
| 2.36E-06 | 7.485674943 |
| 2.39E-06 | 7.472824028 |
| 2.50E-06 | 7.426809593 |
| 2.52E-06 | 7.414821124 |
| 2.54E-06 | 7.406162367 |
| 2.64E-06 | 7.367106507 |
| 2.65E-06 | 7.362544288 |
| 2.66E-06 | 7.354460931 |
| 2.67E-06 | 7.350611163 |
| 2.70E-06 | 7.336543096 |
| 2.71E-06 | 7.333670519 |
| 2.73E-06 | 7.324394159 |
| 2.85E-06 | 7.281164953 |
| 2.94E-06 | 7.247324917 |
| 2.99E-06 | 7.23008546  |
| 3.08E-06 | 7.201055559 |
| 3.09E-06 | 7.195779623 |
| 3.11E-06 | 7.18817457  |
| 3.11E-06 | 7.186967028 |
| 3.18E-06 | 7.160066196 |
| 3.27E-06 | 7.132261329 |
| 3.27E-06 | 7.130213735 |
| 3.30E-06 | 7.116909211 |
| 3.30E-06 | 7.115480412 |



|          |             |
|----------|-------------|
| 3.32E-06 | 7.107549962 |
| 3.36E-06 | 7.094819376 |
| 3.37E-06 | 7.089452672 |
| 3.52E-06 | 7.046047871 |
| 3.53E-06 | 7.040641809 |
| 3.67E-06 | 7.003297543 |
| 3.74E-06 | 6.983644902 |
| 3.78E-06 | 6.969875215 |
| 3.80E-06 | 6.963321203 |
| 3.97E-06 | 6.91938212  |
| 3.98E-06 | 6.914464043 |
| 3.98E-06 | 6.910182    |
| 3.99E-06 | 6.906744098 |
| 4.01E-06 | 6.900394613 |
| 4.25E-06 | 6.840019815 |
| 4.36E-06 | 6.814179602 |
| 4.39E-06 | 6.804183255 |
| 4.47E-06 | 6.783683197 |
| 4.50E-06 | 6.775157424 |
| 4.58E-06 | 6.754031501 |
| 4.67E-06 | 6.734415736 |
| 4.70E-06 | 6.727441711 |
| 4.77E-06 | 6.710412724 |
| 4.82E-06 | 6.699914582 |
| 4.92E-06 | 6.678753285 |
| 5.12E-06 | 6.635874539 |
| 5.18E-06 | 6.623619278 |
| 5.19E-06 | 6.619421403 |
| 5.36E-06 | 6.585650691 |
| 5.56E-06 | 6.547924207 |
| 5.56E-06 | 6.546367594 |
| 5.60E-06 | 6.537325684 |
| 5.75E-06 | 6.511042603 |
| 5.77E-06 | 6.50514608  |
| 5.79E-06 | 6.50122176  |
| 6.07E-06 | 6.452644921 |
| 6.09E-06 | 6.447497985 |
| 6.13E-06 | 6.440002024 |
| 6.16E-06 | 6.433691515 |
| 6.33E-06 | 6.402350645 |
| 6.47E-06 | 6.378535496 |
| 6.49E-06 | 6.374467786 |
| 6.50E-06 | 6.370671417 |
| 6.54E-06 | 6.360945537 |
| 6.54E-06 | 6.359527327 |
| 6.68E-06 | 6.333145818 |
| 6.72E-06 | 6.32621735  |
| 7.00E-06 | 6.285425064 |
| 7.00E-06 | 6.284939629 |
| 7.07E-06 | 6.271335423 |
| 7.07E-06 | 6.271109296 |
| 7.59E-06 | 6.196555626 |
| 7.59E-06 | 6.194721671 |

|          |             |
|----------|-------------|
| 7.63E-06 | 6.18763966  |
| 7.69E-06 | 6.179434864 |
| 7.72E-06 | 6.17313591  |
| 7.79E-06 | 6.163226521 |
| 7.79E-06 | 6.161014587 |
| 7.79E-06 | 6.160929603 |
| 7.80E-06 | 6.157371071 |
| 8.11E-06 | 6.11766489  |
| 8.56E-06 | 6.062419682 |
| 8.73E-06 | 6.04241016  |
| 8.79E-06 | 6.034678432 |
| 8.80E-06 | 6.031543822 |
| 8.80E-06 | 6.029761285 |
| 9.05E-06 | 6.002121863 |
| 9.06E-06 | 5.999570324 |
| 9.07E-06 | 5.99698088  |
| 9.16E-06 | 5.9857697   |
| 9.19E-06 | 5.981335361 |
| 9.29E-06 | 5.968941284 |
| 9.33E-06 | 5.964305604 |
| 9.38E-06 | 5.956205032 |
| 9.61E-06 | 5.929962158 |
| 9.80E-06 | 5.906298759 |
| 9.86E-06 | 5.899438106 |
| 1.01E-05 | 5.86903721  |
| 1.02E-05 | 5.861171976 |
| 1.02E-05 | 5.85958249  |
| 1.04E-05 | 5.839520202 |
| 1.04E-05 | 5.837878876 |
| 1.05E-05 | 5.823418044 |
| 1.06E-05 | 5.805500449 |
| 1.06E-05 | 5.80380614  |
| 1.08E-05 | 5.789230753 |
| 1.10E-05 | 5.767869908 |
| 1.18E-05 | 5.692389806 |
| 1.21E-05 | 5.672985739 |
| 1.21E-05 | 5.668461958 |
| 1.21E-05 | 5.668420269 |
| 1.27E-05 | 5.619721541 |
| 1.31E-05 | 5.591562456 |
| 1.33E-05 | 5.57604402  |
| 1.35E-05 | 5.556944479 |
| 1.36E-05 | 5.550071518 |
| 1.36E-05 | 5.544249903 |
| 1.37E-05 | 5.539064404 |
| 1.39E-05 | 5.52664296  |
| 1.40E-05 | 5.511928275 |
| 1.46E-05 | 5.467837455 |
| 1.51E-05 | 5.433242314 |
| 1.53E-05 | 5.419493937 |
| 1.55E-05 | 5.405248049 |
| 1.56E-05 | 5.395977596 |
| 1.62E-05 | 5.360562162 |

|          |             |
|----------|-------------|
| 1.62E-05 | 5.356498862 |
| 1.62E-05 | 5.355726975 |
| 1.62E-05 | 5.350490842 |
| 1.62E-05 | 5.350478185 |
| 1.63E-05 | 5.344895463 |
| 1.68E-05 | 5.312903723 |
| 1.73E-05 | 5.279257814 |
| 1.78E-05 | 5.253835353 |
| 1.81E-05 | 5.235952435 |
| 1.81E-05 | 5.232086453 |
| 1.85E-05 | 5.21109427  |
| 1.86E-05 | 5.203836364 |
| 1.89E-05 | 5.189929971 |
| 1.90E-05 | 5.181565586 |
| 1.90E-05 | 5.179426114 |
| 1.91E-05 | 5.171463388 |
| 1.93E-05 | 5.158835823 |
| 1.94E-05 | 5.15509666  |
| 1.94E-05 | 5.15222952  |
| 1.95E-05 | 5.148592924 |
| 1.98E-05 | 5.129178756 |
| 1.98E-05 | 5.128228869 |
| 1.99E-05 | 5.122160705 |
| 2.11E-05 | 5.062029001 |
| 2.12E-05 | 5.056551031 |
| 2.14E-05 | 5.046188032 |
| 2.16E-05 | 5.036500166 |
| 2.20E-05 | 5.016626035 |
| 2.21E-05 | 5.008239066 |
| 2.27E-05 | 4.98322143  |
| 2.29E-05 | 4.973311194 |
| 2.31E-05 | 4.964020108 |
| 2.42E-05 | 4.915714162 |
| 2.58E-05 | 4.846877795 |
| 2.61E-05 | 4.836300034 |
| 2.63E-05 | 4.825328422 |
| 2.64E-05 | 4.820860611 |
| 2.65E-05 | 4.815044667 |
| 2.67E-05 | 4.80751953  |
| 2.69E-05 | 4.798698341 |
| 2.72E-05 | 4.785496668 |
| 2.72E-05 | 4.783231962 |
| 2.84E-05 | 4.740832807 |
| 2.85E-05 | 4.73286758  |
| 2.89E-05 | 4.718444834 |
| 2.90E-05 | 4.713203223 |
| 2.92E-05 | 4.702190604 |
| 2.99E-05 | 4.674196603 |
| 2.99E-05 | 4.672096789 |
| 3.00E-05 | 4.66819257  |
| 3.04E-05 | 4.654325695 |
| 3.06E-05 | 4.645062361 |
| 3.18E-05 | 4.605088756 |

|          |             |
|----------|-------------|
| 3.20E-05 | 4.598037729 |
| 3.20E-05 | 4.597851544 |
| 3.21E-05 | 4.59216215  |
| 3.23E-05 | 4.585955564 |
| 3.26E-05 | 4.575643954 |
| 3.26E-05 | 4.574567971 |
| 3.30E-05 | 4.562811434 |
| 3.32E-05 | 4.554295753 |
| 3.39E-05 | 4.532677148 |
| 3.42E-05 | 4.523366602 |
| 3.42E-05 | 4.523113099 |
| 3.47E-05 | 4.507080184 |
| 3.48E-05 | 4.503354661 |
| 3.67E-05 | 4.447600012 |
| 3.67E-05 | 4.446393259 |
| 3.67E-05 | 4.445614704 |
| 3.67E-05 | 4.445171274 |
| 3.72E-05 | 4.429333917 |
| 3.75E-05 | 4.420795795 |
| 3.79E-05 | 4.407775413 |
| 3.82E-05 | 4.400105698 |
| 3.86E-05 | 4.388080874 |
| 3.88E-05 | 4.379742113 |
| 3.94E-05 | 4.362828714 |
| 4.02E-05 | 4.341939804 |
| 4.07E-05 | 4.327185184 |
| 4.08E-05 | 4.323980667 |
| 4.09E-05 | 4.319140205 |
| 4.14E-05 | 4.307736224 |
| 4.15E-05 | 4.303088242 |
| 4.20E-05 | 4.291021292 |
| 4.30E-05 | 4.264834366 |
| 4.32E-05 | 4.259238396 |
| 4.38E-05 | 4.243831106 |
| 4.42E-05 | 4.234336711 |
| 4.43E-05 | 4.228899832 |
| 4.45E-05 | 4.220135968 |
| 4.60E-05 | 4.187805023 |
| 4.63E-05 | 4.179622498 |
| 4.77E-05 | 4.147646473 |
| 4.78E-05 | 4.144102228 |
| 4.84E-05 | 4.132243303 |
| 4.94E-05 | 4.110918722 |
| 4.99E-05 | 4.097346979 |
| 5.06E-05 | 4.082551241 |
| 5.07E-05 | 4.080548097 |
| 5.07E-05 | 4.080183371 |
| 5.12E-05 | 4.069335691 |
| 5.14E-05 | 4.064734764 |
| 5.15E-05 | 4.060984285 |
| 5.28E-05 | 4.035042795 |
| 5.35E-05 | 4.021736583 |
| 5.44E-05 | 4.004693873 |

|          |             |
|----------|-------------|
| 5.48E-05 | 3.996553952 |
| 5.52E-05 | 3.987616628 |
| 5.55E-05 | 3.980147001 |
| 5.60E-05 | 3.972134265 |
| 5.68E-05 | 3.955864871 |
| 5.74E-05 | 3.945934102 |
| 5.77E-05 | 3.93899676  |
| 5.92E-05 | 3.913267578 |
| 5.93E-05 | 3.909861764 |
| 6.03E-05 | 3.892072089 |
| 6.04E-05 | 3.889585036 |
| 6.05E-05 | 3.886919348 |
| 6.13E-05 | 3.873832559 |
| 6.14E-05 | 3.870776963 |
| 6.17E-05 | 3.864913546 |
| 6.25E-05 | 3.849746831 |
| 6.25E-05 | 3.847684602 |
| 6.30E-05 | 3.839825427 |
| 6.31E-05 | 3.837292111 |
| 6.62E-05 | 3.786488177 |
| 6.78E-05 | 3.762608294 |
| 6.89E-05 | 3.745194768 |
| 7.14E-05 | 3.708340417 |
| 7.23E-05 | 3.693575531 |
| 7.29E-05 | 3.684313612 |
| 7.33E-05 | 3.677116321 |
| 7.34E-05 | 3.674827818 |
| 7.38E-05 | 3.667705599 |
| 7.55E-05 | 3.644279837 |
| 7.55E-05 | 3.644039679 |
| 7.56E-05 | 3.640653653 |
| 7.60E-05 | 3.63486245  |
| 7.64E-05 | 3.628374397 |
| 7.99E-05 | 3.582166931 |
| 8.02E-05 | 3.576471711 |
| 8.03E-05 | 3.573628258 |
| 8.20E-05 | 3.552754555 |
| 8.20E-05 | 3.552582209 |
| 8.43E-05 | 3.522168898 |
| 8.46E-05 | 3.516275133 |
| 8.46E-05 | 3.516161411 |
| 8.57E-05 | 3.500970167 |
| 8.62E-05 | 3.492408558 |
| 8.79E-05 | 3.469565273 |
| 8.89E-05 | 3.457227296 |
| 9.01E-05 | 3.443270711 |
| 9.12E-05 | 3.430775413 |
| 9.22E-05 | 3.417792641 |
| 9.26E-05 | 3.411257928 |
| 9.27E-05 | 3.407746859 |
| 9.43E-05 | 3.389294921 |
| 9.45E-05 | 3.385853972 |
| 9.47E-05 | 3.383359455 |

|             |             |
|-------------|-------------|
| 9.71E-05    | 3.358094686 |
| 9.76E-05    | 3.35212217  |
| 9.98E-05    | 3.329299334 |
| 9.98E-05    | 3.327694734 |
| 1.00E-04    | 3.325236905 |
| 0.000100911 | 3.315387949 |
| 0.000101295 | 3.309948115 |
| 0.000103705 | 3.284647413 |
| 0.000103944 | 3.28148018  |
| 0.000105008 | 3.270822584 |
| 0.000109489 | 3.230081421 |
| 0.000110353 | 3.221636553 |
| 0.000110985 | 3.21522943  |
| 0.000111014 | 3.214014066 |
| 0.000111209 | 3.211381382 |
| 0.000111697 | 3.205289689 |
| 0.00011254  | 3.196210381 |
| 0.000112673 | 3.1932701   |
| 0.000112673 | 3.193164185 |
| 0.000113559 | 3.181633595 |
| 0.000113559 | 3.179448418 |
| 0.000113559 | 3.179238449 |
| 0.000113559 | 3.179022837 |
| 0.0001152   | 3.158734546 |
| 0.00011539  | 3.154334987 |
| 0.000115896 | 3.147918582 |
| 0.000115896 | 3.147346577 |
| 0.000116399 | 3.142282712 |
| 0.00011757  | 3.128619737 |
| 0.000118783 | 3.117381823 |
| 0.00011978  | 3.108497742 |
| 0.000120066 | 3.104372901 |
| 0.000121645 | 3.09101304  |
| 0.000121925 | 3.087402105 |
| 0.000121925 | 3.086966833 |
| 0.000122558 | 3.075805073 |
| 0.000122558 | 3.073729224 |
| 0.000124816 | 3.054532229 |
| 0.000125097 | 3.049645921 |
| 0.000125542 | 3.045353507 |
| 0.00012573  | 3.04209876  |
| 0.000126108 | 3.038333256 |
| 0.000126304 | 3.035945279 |
| 0.000129249 | 3.011305438 |
| 0.000129403 | 3.009004635 |
| 0.000131186 | 2.990823898 |
| 0.000134495 | 2.964033359 |
| 0.000134495 | 2.962842469 |
| 0.00013469  | 2.959473578 |
| 0.000134932 | 2.955208482 |
| 0.000134932 | 2.9550894   |
| 0.000135666 | 2.949036169 |
| 0.000135821 | 2.947060711 |

|             |             |
|-------------|-------------|
| 0.000137162 | 2.933275113 |
| 0.000138416 | 2.923739129 |
| 0.000141235 | 2.898388255 |
| 0.000141876 | 2.891448986 |
| 0.000141997 | 2.888881305 |
| 0.000144596 | 2.869896702 |
| 0.000144942 | 2.865897328 |
| 0.000145334 | 2.861566314 |
| 0.000146207 | 2.854133164 |
| 0.000146443 | 2.851729516 |
| 0.000147671 | 2.842928749 |
| 0.000148949 | 2.833006543 |
| 0.000150781 | 2.820527149 |
| 0.000151882 | 2.812749454 |
| 0.00015294  | 2.804425765 |
| 0.000156089 | 2.782478626 |
| 0.000157104 | 2.775460976 |
| 0.000157156 | 2.774288692 |
| 0.000158184 | 2.767052567 |
| 0.000158184 | 2.766377245 |
| 0.000159614 | 2.756116759 |
| 0.000159903 | 2.752686619 |
| 0.00016184  | 2.7386916   |
| 0.00016253  | 2.733796911 |
| 0.000163391 | 2.727926243 |
| 0.000164232 | 2.72025085  |
| 0.000164232 | 2.719657745 |
| 0.000165653 | 2.710625058 |
| 0.00016608  | 2.704021909 |
| 0.00016608  | 2.701509876 |
| 0.00016608  | 2.700587364 |
| 0.000167753 | 2.68939473  |
| 0.000167956 | 2.687406381 |
| 0.00017237  | 2.660265106 |
| 0.000173164 | 2.655069717 |
| 0.000173416 | 2.652853573 |
| 0.000174073 | 2.647597609 |
| 0.000175389 | 2.637123263 |
| 0.000175607 | 2.635113704 |
| 0.000175638 | 2.634115689 |
| 0.000176477 | 2.627113085 |
| 0.000178075 | 2.617731479 |
| 0.000179189 | 2.610158431 |
| 0.00018129  | 2.596627881 |
| 0.000182107 | 2.589901385 |
| 0.000183334 | 2.582468874 |
| 0.000183334 | 2.58188673  |
| 0.000184092 | 2.576339321 |
| 0.000184894 | 2.570578873 |
| 0.000186413 | 2.56118894  |
| 0.000188474 | 2.549124547 |
| 0.000189147 | 2.54331045  |
| 0.000191581 | 2.528538699 |

|             |             |
|-------------|-------------|
| 0.000192454 | 2.522823191 |
| 0.00019305  | 2.518989815 |
| 0.000193812 | 2.512929921 |
| 0.000195119 | 2.504406903 |
| 0.000200718 | 2.474292444 |
| 0.000200981 | 2.472063194 |
| 0.000201162 | 2.470272896 |
| 0.000201162 | 2.469611982 |
| 0.00020374  | 2.454879589 |
| 0.00020374  | 2.454350578 |
| 0.000204082 | 2.451173984 |
| 0.000204398 | 2.448911655 |
| 0.000208002 | 2.430097238 |
| 0.000208002 | 2.429963257 |
| 0.000209689 | 2.419142293 |
| 0.000210314 | 2.415536284 |
| 0.000214001 | 2.398267652 |
| 0.000222884 | 2.356564985 |
| 0.000226539 | 2.340359987 |
| 0.00022657  | 2.339451116 |
| 0.000228074 | 2.331612482 |
| 0.000229004 | 2.32697723  |
| 0.000230288 | 2.320897206 |
| 0.000232975 | 2.30460111  |
| 0.000232975 | 2.302911433 |
| 0.000237128 | 2.284617733 |
| 0.000239127 | 2.275039972 |
| 0.000239127 | 2.273672383 |
| 0.000239127 | 2.273578287 |
| 0.00023913  | 2.272795521 |
| 0.000241543 | 2.262510594 |
| 0.000246675 | 2.238755254 |
| 0.000246937 | 2.236982921 |
| 0.000249399 | 2.22681733  |
| 0.000250326 | 2.222538316 |
| 0.000251849 | 2.214504263 |
| 0.000256719 | 2.19483781  |
| 0.000258302 | 2.187495673 |
| 0.000258587 | 2.185690938 |
| 0.000258845 | 2.1832325   |
| 0.000258878 | 2.18235382  |
| 0.000261067 | 2.173620077 |
| 0.000262956 | 2.163771725 |
| 0.000263791 | 2.160017442 |
| 0.000267247 | 2.143930831 |
| 0.000267653 | 2.141743694 |
| 0.000270522 | 2.129398972 |
| 0.000270984 | 2.126290863 |
| 0.000271986 | 2.122049372 |
| 0.000272495 | 2.119533849 |
| 0.000275543 | 2.10528047  |
| 0.000276627 | 2.099337633 |
| 0.000280279 | 2.086178519 |



|             |             |
|-------------|-------------|
| 0.000282124 | 2.078488934 |
| 0.000283589 | 2.072847778 |
| 0.000284258 | 2.069141895 |
| 0.000286757 | 2.059918668 |
| 0.000287704 | 2.055526532 |
| 0.000287784 | 2.054330724 |
| 0.000287784 | 2.053791874 |
| 0.000290992 | 2.040367866 |
| 0.000291099 | 2.038601757 |
| 0.000291099 | 2.038021707 |
| 0.000291099 | 2.037827876 |
| 0.000292649 | 2.032071058 |
| 0.000301726 | 1.996548505 |
| 0.000301726 | 1.995893961 |
| 0.000303046 | 1.991038413 |
| 0.000304236 | 1.986606537 |
| 0.000305748 | 1.980471686 |
| 0.000305921 | 1.97905548  |
| 0.000306259 | 1.976730232 |
| 0.000306494 | 1.97528521  |
| 0.000308678 | 1.967128939 |
| 0.000310567 | 1.959921256 |
| 0.000312265 | 1.951897575 |
| 0.000313358 | 1.947876131 |
| 0.000314581 | 1.943476959 |
| 0.000315221 | 1.940550328 |
| 0.000315546 | 1.938228883 |
| 0.000324329 | 1.908206801 |
| 0.000325264 | 1.90463893  |
| 0.000325264 | 1.904065514 |
| 0.000326303 | 1.900342065 |
| 0.000331334 | 1.884455107 |
| 0.000331889 | 1.881462439 |
| 0.000338313 | 1.859467946 |
| 0.000338365 | 1.85756208  |
| 0.000341017 | 1.849477244 |
| 0.000347186 | 1.831146392 |
| 0.000349223 | 1.824194969 |
| 0.000351856 | 1.816394344 |
| 0.000352454 | 1.814092418 |
| 0.000354662 | 1.807488905 |
| 0.000355044 | 1.805777111 |
| 0.000357467 | 1.798649775 |
| 0.000362384 | 1.78503821  |
| 0.000367092 | 1.770754096 |
| 0.000368008 | 1.767011704 |
| 0.000373309 | 1.752800113 |
| 0.000377322 | 1.740436719 |
| 0.000377322 | 1.739933458 |
| 0.000380872 | 1.72901633  |
| 0.000383103 | 1.72212034  |
| 0.00038323  | 1.72112066  |
| 0.000385393 | 1.714429018 |

|             |             |
|-------------|-------------|
| 0.000385573 | 1.713303922 |
| 0.000389778 | 1.700999225 |
| 0.00039292  | 1.692730455 |
| 0.000401272 | 1.670808565 |
| 0.000403712 | 1.663479143 |
| 0.000403712 | 1.663039298 |
| 0.000410614 | 1.646343438 |
| 0.000414675 | 1.636368762 |
| 0.000416693 | 1.630426544 |
| 0.000418701 | 1.624529711 |
| 0.000421827 | 1.616150756 |
| 0.000423757 | 1.611164986 |
| 0.000429476 | 1.597152985 |
| 0.000432433 | 1.589374782 |
| 0.000432433 | 1.589325731 |
| 0.000440624 | 1.566904224 |
| 0.000441164 | 1.56457626  |
| 0.000442497 | 1.560891589 |
| 0.000443218 | 1.558685077 |
| 0.000447212 | 1.548880024 |
| 0.000449129 | 1.543507393 |
| 0.000450933 | 1.53772858  |
| 0.000450965 | 1.53699733  |
| 0.00045479  | 1.527695809 |
| 0.00045487  | 1.526203332 |
| 0.000457017 | 1.520308454 |
| 0.000457281 | 1.518567967 |
| 0.000460662 | 1.508788005 |
| 0.000460662 | 1.508318253 |
| 0.000466785 | 1.493226483 |
| 0.00047215  | 1.479819913 |
| 0.000474299 | 1.474879923 |
| 0.000476985 | 1.467933939 |
| 0.000476985 | 1.467469252 |
| 0.00048011  | 1.458172    |
| 0.000481657 | 1.453835496 |
| 0.000484411 | 1.447806762 |
| 0.000485858 | 1.444343087 |
| 0.00048698  | 1.441518844 |
| 0.000487816 | 1.439253546 |
| 0.00048821  | 1.437844071 |
| 0.00049061  | 1.43127818  |
| 0.000492737 | 1.425905313 |
| 0.000492961 | 1.424832795 |
| 0.000494136 | 1.420755242 |
| 0.000494136 | 1.420656777 |
| 0.00049894  | 1.409601078 |
| 0.000501225 | 1.404648605 |
| 0.000510175 | 1.382201455 |
| 0.000526856 | 1.34552398  |
| 0.000526856 | 1.345504589 |
| 0.000536738 | 1.324820823 |
| 0.000539068 | 1.319476111 |

|             |             |
|-------------|-------------|
| 0.000544602 | 1.30795804  |
| 0.000553817 | 1.290176889 |
| 0.000561114 | 1.276660464 |
| 0.000561953 | 1.274006879 |
| 0.000561953 | 1.274000109 |
| 0.000564115 | 1.269755123 |
| 0.000565663 | 1.266547536 |
| 0.000566303 | 1.264857244 |
| 0.000573566 | 1.25159712  |
| 0.000576386 | 1.246350038 |
| 0.000578049 | 1.242390797 |
| 0.0005781   | 1.241685951 |
| 0.00058021  | 1.237402177 |
| 0.00058021  | 1.23700945  |
| 0.000581263 | 1.233555735 |
| 0.000581263 | 1.233440352 |
| 0.00059731  | 1.205300675 |
| 0.000598555 | 1.202720636 |
| 0.000600114 | 1.198785657 |
| 0.000600114 | 1.198420665 |
| 0.000606274 | 1.188181793 |
| 0.000613198 | 1.176249869 |
| 0.000614516 | 1.172998768 |
| 0.000621018 | 1.16246843  |
| 0.000622029 | 1.160323427 |
| 0.000622188 | 1.15946904  |
| 0.000633932 | 1.140629203 |
| 0.000636598 | 1.13545287  |
| 0.000642408 | 1.126284497 |
| 0.000642776 | 1.125134246 |
| 0.000648699 | 1.115884951 |
| 0.000649228 | 1.114507858 |
| 0.000651098 | 1.11118941  |
| 0.000658514 | 1.097902902 |
| 0.000658514 | 1.097482879 |
| 0.000663374 | 1.088244566 |
| 0.000665814 | 1.084071784 |
| 0.000669943 | 1.077041085 |
| 0.000675815 | 1.068219234 |
| 0.000676278 | 1.066971757 |
| 0.000680109 | 1.058641153 |
| 0.000680429 | 1.05759755  |
| 0.000685349 | 1.049806809 |
| 0.000685349 | 1.04961195  |
| 0.000689778 | 1.04234837  |
| 0.000692923 | 1.034562733 |
| 0.00069293  | 1.033871182 |
| 0.000698132 | 1.025636907 |
| 0.00070136  | 1.019509423 |
| 0.000705847 | 1.012910825 |
| 0.000710201 | 1.006529451 |
| 0.000714293 | 0.999933963 |
| 0.000715261 | 0.998066299 |

|             |             |
|-------------|-------------|
| 0.000718086 | 0.993763561 |
| 0.000719633 | 0.991146095 |
| 0.000726551 | 0.981551022 |
| 0.000728811 | 0.976907761 |
| 0.000730063 | 0.974649301 |
| 0.0007335   | 0.969049401 |
| 0.000746087 | 0.945995303 |
| 0.000747504 | 0.943625983 |
| 0.0007476   | 0.942920779 |
| 0.000749847 | 0.93834609  |
| 0.000751512 | 0.935677202 |
| 0.000756667 | 0.927634396 |
| 0.000757901 | 0.925384964 |
| 0.000772406 | 0.904649922 |
| 0.000779497 | 0.894896518 |
| 0.000782909 | 0.890209544 |
| 0.000796043 | 0.87398413  |
| 0.000806372 | 0.860128914 |
| 0.000811649 | 0.853185292 |
| 0.000811649 | 0.852417206 |
| 0.000813017 | 0.850108057 |
| 0.00081709  | 0.844298148 |
| 0.00081709  | 0.844259469 |
| 0.000819839 | 0.840526667 |
| 0.000825098 | 0.833366857 |
| 0.000840262 | 0.814527282 |
| 0.000843331 | 0.810527012 |
| 0.000844382 | 0.807916808 |
| 0.000849223 | 0.7999879   |
| 0.000849485 | 0.79912886  |
| 0.000865842 | 0.778360974 |
| 0.000867596 | 0.775891955 |
| 0.000871757 | 0.770827929 |
| 0.000875468 | 0.76622407  |
| 0.000875468 | 0.765703318 |
| 0.000875793 | 0.764788687 |
| 0.000877007 | 0.76292151  |
| 0.000881987 | 0.756470422 |
| 0.000887371 | 0.749623741 |
| 0.000893126 | 0.742985676 |
| 0.000894537 | 0.740938476 |
| 0.000902814 | 0.73172151  |
| 0.000908938 | 0.723683407 |
| 0.000921067 | 0.709545552 |
| 0.000921664 | 0.708376975 |
| 0.000924598 | 0.704484862 |
| 0.000927372 | 0.700896979 |
| 0.000930893 | 0.696778854 |
| 0.00093752  | 0.689556305 |
| 0.000942159 | 0.681574522 |
| 0.000945967 | 0.67722928  |
| 0.000951043 | 0.67109201  |
| 0.000953056 | 0.66799576  |

|             |             |
|-------------|-------------|
| 0.000953191 | 0.666753337 |
| 0.000955738 | 0.663693636 |
| 0.00095668  | 0.662214233 |
| 0.000964394 | 0.653566493 |
| 0.000984565 | 0.632470954 |
| 0.000999081 | 0.617781135 |
| 0.000999081 | 0.617625818 |
| 0.001015777 | 0.601515375 |
| 0.001029961 | 0.586989891 |
| 0.001035879 | 0.580920217 |
| 0.001036245 | 0.580039007 |
| 0.001047339 | 0.568398905 |
| 0.001049143 | 0.566235207 |
| 0.001050746 | 0.564254869 |
| 0.001055481 | 0.558941613 |
| 0.001074237 | 0.539137957 |
| 0.001078564 | 0.534820671 |
| 0.001081382 | 0.531044733 |
| 0.001081382 | 0.530740893 |
| 0.001086192 | 0.524405859 |
| 0.001090786 | 0.519903752 |
| 0.001098859 | 0.510280989 |
| 0.001111372 | 0.498479832 |
| 0.001111372 | 0.498039682 |
| 0.001114596 | 0.494783255 |
| 0.001117969 | 0.49140945  |
| 0.001124795 | 0.485161438 |
| 0.001136161 | 0.474117144 |
| 0.001138387 | 0.471207896 |
| 0.001143895 | 0.465608204 |
| 0.001150924 | 0.457186308 |
| 0.001189009 | 0.422393359 |
| 0.00119218  | 0.418942997 |
| 0.00119218  | 0.418833574 |
| 0.001196588 | 0.414841738 |
| 0.001197293 | 0.413045823 |
| 0.00119887  | 0.410934945 |
| 0.001208283 | 0.401486016 |
| 0.001212771 | 0.397394732 |
| 0.001212771 | 0.396426566 |
| 0.001219728 | 0.389482987 |
| 0.001220788 | 0.388142118 |
| 0.001220956 | 0.387486862 |
| 0.001224377 | 0.383813076 |
| 0.001225528 | 0.382406915 |
| 0.001233778 | 0.375593314 |
| 0.001234394 | 0.374600902 |
| 0.001236735 | 0.372300127 |
| 0.001242702 | 0.365694859 |
| 0.001243089 | 0.364880322 |
| 0.00124439  | 0.363281217 |
| 0.00124439  | 0.362184038 |
| 0.00124439  | 0.362167926 |

|             |             |
|-------------|-------------|
| 0.001247595 | 0.358357619 |
| 0.001254037 | 0.352490182 |
| 0.001256565 | 0.349964436 |
| 0.00127634  | 0.334410847 |
| 0.001278921 | 0.331998749 |
| 0.001286105 | 0.325712423 |
| 0.001288428 | 0.32350338  |
| 0.001292384 | 0.318737331 |
| 0.001292384 | 0.318560576 |
| 0.001306072 | 0.307656104 |
| 0.001312117 | 0.302813587 |
| 0.001313621 | 0.30107905  |
| 0.00132667  | 0.290934276 |
| 0.001327104 | 0.290112834 |
| 0.00132998  | 0.287570033 |
| 0.001334871 | 0.283616731 |
| 0.001338303 | 0.280697495 |
| 0.001351173 | 0.270706027 |
| 0.00135305  | 0.267866699 |
| 0.001356502 | 0.262920667 |
| 0.001379961 | 0.244822006 |
| 0.001392616 | 0.234745075 |
| 0.001395476 | 0.231949999 |
| 0.001395476 | 0.231757647 |
| 0.001400652 | 0.227323488 |
| 0.001402191 | 0.225786902 |
| 0.001405307 | 0.223201277 |
| 0.001407361 | 0.221326727 |
| 0.001414926 | 0.214787667 |
| 0.001428142 | 0.20557756  |
| 0.001443768 | 0.193369268 |
| 0.001448043 | 0.190097004 |
| 0.001464068 | 0.177276686 |
| 0.001466902 | 0.174435015 |
| 0.001485872 | 0.159925973 |
| 0.001528375 | 0.131033464 |
| 0.001532199 | 0.127696481 |
| 0.001535172 | 0.124884914 |
| 0.001547298 | 0.117025929 |
| 0.001554117 | 0.111418288 |
| 0.001559921 | 0.106936637 |
| 0.001564941 | 0.103434684 |
| 0.00157154  | 0.098505721 |
| 0.001584196 | 0.090011425 |
| 0.001585124 | 0.088968074 |
| 0.001602807 | 0.0776026   |
| 0.001605833 | 0.074849172 |
| 0.001608121 | 0.07252986  |
| 0.001614247 | 0.068480549 |
| 0.001632283 | 0.055626904 |
| 0.001648933 | 0.04466215  |
| 0.0016579   | 0.038609735 |
| 0.001662633 | 0.035453913 |

|             |              |
|-------------|--------------|
| 0.001680045 | 0.025224019  |
| 0.001681465 | 0.023944238  |
| 0.001686262 | 0.020301892  |
| 0.001694427 | 0.015297156  |
| 0.001712725 | 0.001323458  |
| 0.001744048 | -0.018281324 |
| 0.001744048 | -0.018502566 |
| 0.001751204 | -0.022814048 |
| 0.001782798 | -0.042056148 |
| 0.001811858 | -0.059948495 |
| 0.001853815 | -0.085182309 |
| 0.00185776  | -0.088094927 |
| 0.001864749 | -0.092833685 |
| 0.001873092 | -0.098603122 |
| 0.001875059 | -0.100613539 |
| 0.001878533 | -0.102820008 |
| 0.001878868 | -0.103580382 |
| 0.001878868 | -0.103940634 |
| 0.001882007 | -0.107405485 |
| 0.00189327  | -0.11487914  |
| 0.001896432 | -0.117386743 |
| 0.001897776 | -0.118522505 |
| 0.001899885 | -0.120033586 |
| 0.001909974 | -0.125452536 |
| 0.001912194 | -0.127010582 |
| 0.001913031 | -0.127892976 |
| 0.001924159 | -0.134253749 |
| 0.001934108 | -0.139541244 |
| 0.001946993 | -0.148099215 |
| 0.001947568 | -0.14899526  |
| 0.001955669 | -0.153662409 |
| 0.001965718 | -0.159856891 |
| 0.001967087 | -0.161090682 |
| 0.001967087 | -0.161445566 |
| 0.002025432 | -0.192004117 |
| 0.002029987 | -0.195037347 |
| 0.002045391 | -0.20395485  |
| 0.002069706 | -0.217773032 |
| 0.002105976 | -0.238151571 |
| 0.002107007 | -0.239994712 |
| 0.002128153 | -0.251154383 |
| 0.002145342 | -0.259944126 |
| 0.002145342 | -0.260038669 |
| 0.002155438 | -0.264877339 |
| 0.002175212 | -0.275689889 |
| 0.002175682 | -0.276349898 |
| 0.002189165 | -0.284072438 |
| 0.002206489 | -0.293120696 |
| 0.00222287  | -0.300473249 |
| 0.002224466 | -0.301598424 |
| 0.002226022 | -0.303162351 |
| 0.002245815 | -0.31278077  |
| 0.002252873 | -0.317069873 |

|             |              |
|-------------|--------------|
| 0.002262483 | -0.321640201 |
| 0.002265999 | -0.323846723 |
| 0.002318918 | -0.351188272 |
| 0.002320916 | -0.35249259  |
| 0.002322373 | -0.354034913 |
| 0.002322373 | -0.354353519 |
| 0.002336352 | -0.360469458 |
| 0.002348736 | -0.365899734 |
| 0.002359345 | -0.371391035 |
| 0.00236795  | -0.375679725 |
| 0.0023835   | -0.38535581  |
| 0.002415947 | -0.401515778 |
| 0.002421791 | -0.404210828 |
| 0.002465755 | -0.424072298 |
| 0.002481927 | -0.431045619 |
| 0.002492586 | -0.435478414 |
| 0.002510018 | -0.443293446 |
| 0.002511126 | -0.445028063 |
| 0.002513989 | -0.446859534 |
| 0.002522135 | -0.450422607 |
| 0.002538792 | -0.459188944 |
| 0.00255918  | -0.468389357 |
| 0.002570129 | -0.473239397 |
| 0.002572538 | -0.474549034 |
| 0.002581753 | -0.478751858 |
| 0.002587516 | -0.481264225 |
| 0.002588269 | -0.481971802 |
| 0.002590806 | -0.483320298 |
| 0.002629312 | -0.498359706 |
| 0.002644968 | -0.506060629 |
| 0.002647031 | -0.507220692 |
| 0.002665345 | -0.516239596 |
| 0.002672736 | -0.519249422 |
| 0.002722978 | -0.539859768 |
| 0.002722978 | -0.540034288 |
| 0.002728621 | -0.542822277 |
| 0.002732651 | -0.544626129 |
| 0.0027528   | -0.553181001 |
| 0.002766487 | -0.558653806 |
| 0.00277046  | -0.560417752 |
| 0.002795058 | -0.569497685 |
| 0.0028184   | -0.578945734 |
| 0.002853747 | -0.591818699 |
| 0.002888673 | -0.604836765 |
| 0.002899295 | -0.609527874 |
| 0.002907681 | -0.612639008 |
| 0.00292481  | -0.618950406 |
| 0.002929154 | -0.620755021 |
| 0.002937765 | -0.623908805 |
| 0.002948649 | -0.629044228 |
| 0.002961899 | -0.634586037 |
| 0.002962161 | -0.63541184  |
| 0.002973662 | -0.641126447 |



|             |              |
|-------------|--------------|
| 0.002995014 | -0.648619842 |
| 0.003013586 | -0.656470792 |
| 0.003038236 | -0.666133266 |
| 0.003083314 | -0.682340758 |
| 0.003083538 | -0.683244706 |
| 0.003090849 | -0.686280739 |
| 0.003092807 | -0.687286632 |
| 0.003133036 | -0.701377292 |
| 0.003146348 | -0.70666426  |
| 0.003146348 | -0.706980191 |
| 0.003149506 | -0.708743322 |
| 0.003170998 | -0.716182145 |
| 0.003171571 | -0.717119262 |
| 0.003171571 | -0.71798444  |
| 0.003191933 | -0.72448797  |
| 0.003193907 | -0.725768258 |
| 0.003199126 | -0.728489017 |
| 0.003199126 | -0.729301057 |
| 0.003199126 | -0.731263559 |
| 0.003199126 | -0.73137782  |
| 0.003199126 | -0.731531244 |
| 0.003216524 | -0.737964748 |
| 0.003216838 | -0.738713943 |
| 0.003219444 | -0.739876371 |
| 0.003235576 | -0.746521129 |
| 0.003257925 | -0.754595569 |
| 0.003264435 | -0.757502869 |
| 0.003276456 | -0.761494979 |
| 0.003291621 | -0.76618959  |
| 0.003299727 | -0.769288137 |
| 0.00330981  | -0.774066079 |
| 0.003317467 | -0.776707144 |
| 0.003322066 | -0.7783993   |
| 0.003325279 | -0.779702532 |
| 0.003325504 | -0.780171463 |
| 0.003326269 | -0.780860946 |
| 0.003326269 | -0.781196279 |
| 0.003339588 | -0.785715788 |
| 0.003348533 | -0.78860358  |
| 0.003354621 | -0.790694287 |
| 0.003376693 | -0.797777146 |
| 0.00337696  | -0.798971599 |
| 0.003388725 | -0.802909734 |
| 0.003394589 | -0.804917571 |
| 0.00340077  | -0.807008881 |
| 0.003402255 | -0.807816903 |
| 0.003412483 | -0.811810377 |
| 0.003432964 | -0.819089293 |
| 0.003432964 | -0.819372068 |
| 0.003436097 | -0.82102105  |
| 0.003449058 | -0.825716609 |
| 0.003456038 | -0.828417029 |
| 0.003456038 | -0.828793176 |

|             |              |
|-------------|--------------|
| 0.003508475 | -0.844361088 |
| 0.003511268 | -0.845886245 |
| 0.003513013 | -0.846757119 |
| 0.003536482 | -0.855322389 |
| 0.003544613 | -0.858247516 |
| 0.003552699 | -0.861948857 |
| 0.003568888 | -0.866561851 |
| 0.003642581 | -0.888284637 |
| 0.003644085 | -0.889062608 |
| 0.00364523  | -0.889748873 |
| 0.003661417 | -0.89543483  |
| 0.0036708   | -0.89820179  |
| 0.003679986 | -0.900912515 |
| 0.00368633  | -0.904083301 |
| 0.003686598 | -0.904543791 |
| 0.003691862 | -0.906259352 |
| 0.00371802  | -0.913589269 |
| 0.003733583 | -0.920203895 |
| 0.003743876 | -0.923537584 |
| 0.003749346 | -0.925281589 |
| 0.003753399 | -0.926673525 |
| 0.0037603   | -0.928766624 |
| 0.003778115 | -0.933927113 |
| 0.003779546 | -0.9346681   |
| 0.00379166  | -0.938413077 |
| 0.003808144 | -0.943600742 |
| 0.003852428 | -0.955091241 |
| 0.003879439 | -0.964280886 |
| 0.003898839 | -0.970063738 |
| 0.003901505 | -0.971083897 |
| 0.003914215 | -0.974869919 |
| 0.003937178 | -0.981202299 |
| 0.003937178 | -0.981446959 |
| 0.003972185 | -0.990802956 |
| 0.004001801 | -0.99999203  |
| 0.004033249 | -1.008393416 |
| 0.004072643 | -1.019694179 |
| 0.004086515 | -1.023607969 |
| 0.00409785  | -1.02693729  |
| 0.004103779 | -1.029052544 |
| 0.004103779 | -1.029336532 |
| 0.004106449 | -1.030405735 |
| 0.004128923 | -1.035840172 |
| 0.004131379 | -1.036771811 |
| 0.004142339 | -1.040748217 |
| 0.00415633  | -1.044664    |
| 0.00415633  | -1.045201439 |
| 0.00415633  | -1.045390665 |
| 0.004177032 | -1.053402843 |
| 0.004229969 | -1.06770417  |
| 0.00425557  | -1.074042439 |
| 0.004267681 | -1.077049174 |
| 0.004270193 | -1.078347207 |

|             |              |
|-------------|--------------|
| 0.004273684 | -1.079479925 |
| 0.004295167 | -1.085248006 |
| 0.004303965 | -1.087517144 |
| 0.004306304 | -1.088395645 |
| 0.004313697 | -1.090733574 |
| 0.004317639 | -1.092261971 |
| 0.004321444 | -1.093518803 |
| 0.004330333 | -1.095794653 |
| 0.004354364 | -1.102037741 |
| 0.004365854 | -1.104849585 |
| 0.004397731 | -1.11270036  |
| 0.004407486 | -1.116242953 |
| 0.004430322 | -1.122380335 |
| 0.004430322 | -1.122442721 |
| 0.004430322 | -1.122885439 |
| 0.004437096 | -1.124670514 |
| 0.004450657 | -1.128949294 |
| 0.004450657 | -1.128979449 |
| 0.004457321 | -1.131476634 |
| 0.004492341 | -1.140262165 |
| 0.004506259 | -1.1445367   |
| 0.004509834 | -1.145706949 |
| 0.004509834 | -1.146008924 |
| 0.004514419 | -1.148279023 |
| 0.004514419 | -1.148514568 |
| 0.004518109 | -1.150037194 |
| 0.004518109 | -1.15028625  |
| 0.004533667 | -1.154936691 |
| 0.004538941 | -1.156814842 |
| 0.004538941 | -1.157384094 |
| 0.004538941 | -1.157848345 |
| 0.004552967 | -1.161801024 |
| 0.004561781 | -1.163955544 |
| 0.004614476 | -1.176036638 |
| 0.004640098 | -1.182251189 |
| 0.004710596 | -1.199468226 |
| 0.00475367  | -1.208970299 |
| 0.004764036 | -1.212072675 |
| 0.00476672  | -1.212956029 |
| 0.004769686 | -1.213991362 |
| 0.004777956 | -1.216581726 |
| 0.004799874 | -1.22189628  |
| 0.004814894 | -1.227172342 |
| 0.004814894 | -1.228033579 |
| 0.004841996 | -1.233939376 |
| 0.004847612 | -1.235370377 |
| 0.004880504 | -1.242695964 |
| 0.004888822 | -1.244987921 |
| 0.004907839 | -1.248932813 |
| 0.004923348 | -1.252564718 |
| 0.004995696 | -1.269260018 |
| 0.005005604 | -1.27145843  |
| 0.005027304 | -1.276512671 |

|             |              |
|-------------|--------------|
| 0.005042587 | -1.280028774 |
| 0.005048683 | -1.281901091 |
| 0.005062959 | -1.285532827 |
| 0.00508569  | -1.290862357 |
| 0.00508569  | -1.291279316 |
| 0.005089235 | -1.292445066 |
| 0.005099934 | -1.294738571 |
| 0.005106893 | -1.297061812 |
| 0.00511655  | -1.299160014 |
| 0.005124902 | -1.301019911 |
| 0.005145833 | -1.305844113 |
| 0.005212789 | -1.319413377 |
| 0.005248183 | -1.327550572 |
| 0.005265703 | -1.331682319 |
| 0.005275102 | -1.334031547 |
| 0.005280486 | -1.335324438 |
| 0.005286193 | -1.338470729 |
| 0.005286193 | -1.338779092 |
| 0.005328673 | -1.347914404 |
| 0.005332087 | -1.349204891 |
| 0.005358443 | -1.354103001 |
| 0.005362767 | -1.355545811 |
| 0.005385924 | -1.360916115 |
| 0.005391004 | -1.362134321 |
| 0.005404846 | -1.364847874 |
| 0.005412619 | -1.366521679 |
| 0.005426656 | -1.36925868  |
| 0.005443836 | -1.373565215 |
| 0.005448651 | -1.374728014 |
| 0.00545882  | -1.377142198 |
| 0.005502361 | -1.38620236  |
| 0.005508054 | -1.387650789 |
| 0.005508054 | -1.38819291  |
| 0.005508054 | -1.389318177 |
| 0.00551047  | -1.390328101 |
| 0.005514397 | -1.391330391 |
| 0.005522111 | -1.393134221 |
| 0.005561874 | -1.401478811 |
| 0.005600229 | -1.409015967 |
| 0.005600295 | -1.409370715 |
| 0.005622509 | -1.413363537 |
| 0.005662733 | -1.420964705 |
| 0.005662952 | -1.421343577 |
| 0.005695614 | -1.427330083 |
| 0.005706541 | -1.429439123 |
| 0.005761937 | -1.439903214 |
| 0.005761937 | -1.440053647 |
| 0.005764999 | -1.440885281 |
| 0.005791125 | -1.446759511 |
| 0.005801912 | -1.449025282 |
| 0.005801912 | -1.449156319 |
| 0.005809059 | -1.450972403 |
| 0.005827126 | -1.455535485 |

|             |              |
|-------------|--------------|
| 0.005841065 | -1.458416447 |
| 0.005898507 | -1.469206876 |
| 0.005898507 | -1.469467972 |
| 0.005903176 | -1.471590304 |
| 0.00594823  | -1.479570002 |
| 0.005970244 | -1.483985952 |
| 0.005994043 | -1.488788804 |
| 0.005998039 | -1.490287661 |
| 0.006020963 | -1.495147174 |
| 0.006033277 | -1.497833876 |
| 0.006033277 | -1.498333957 |
| 0.006042523 | -1.500455007 |
| 0.00605455  | -1.502621478 |
| 0.006055661 | -1.503125975 |
| 0.006059038 | -1.504309882 |
| 0.006079425 | -1.508072684 |
| 0.006098317 | -1.511598935 |
| 0.006115817 | -1.516945783 |
| 0.006115817 | -1.5172215   |
| 0.006115817 | -1.517286645 |
| 0.006115817 | -1.517577479 |
| 0.006116039 | -1.517944275 |
| 0.006145641 | -1.523721195 |
| 0.006153908 | -1.525291273 |
| 0.006225578 | -1.53727859  |
| 0.006250376 | -1.541601226 |
| 0.006302781 | -1.551935823 |
| 0.006327733 | -1.557687753 |
| 0.006327733 | -1.558207893 |
| 0.006327733 | -1.558214658 |
| 0.0063332   | -1.559339084 |
| 0.006333795 | -1.559755167 |
| 0.006335431 | -1.560452239 |
| 0.00637449  | -1.566965457 |
| 0.0063852   | -1.568838964 |
| 0.006406995 | -1.573229279 |
| 0.006429986 | -1.57691258  |
| 0.006436005 | -1.578101651 |
| 0.006482183 | -1.585662233 |
| 0.006504059 | -1.589272409 |
| 0.006508628 | -1.591466903 |
| 0.006508628 | -1.591617275 |
| 0.006508628 | -1.591823186 |
| 0.006508628 | -1.592106737 |
| 0.006508628 | -1.592232316 |
| 0.006510709 | -1.593180841 |
| 0.006510709 | -1.593300656 |
| 0.006517325 | -1.594561311 |
| 0.006610429 | -1.609887786 |
| 0.006611089 | -1.610483086 |
| 0.006611089 | -1.610630519 |
| 0.006638061 | -1.615349802 |
| 0.006649889 | -1.617636347 |

|             |              |
|-------------|--------------|
| 0.006680137 | -1.622133532 |
| 0.006747541 | -1.632012121 |
| 0.006751851 | -1.632923328 |
| 0.006773422 | -1.636811233 |
| 0.006780301 | -1.63808448  |
| 0.006806845 | -1.642969864 |
| 0.006834748 | -1.648022049 |
| 0.006863307 | -1.653144434 |
| 0.006873879 | -1.654903481 |
| 0.006889827 | -1.657976996 |
| 0.006897588 | -1.659976502 |
| 0.006917409 | -1.663256168 |
| 0.00691807  | -1.663855901 |
| 0.00691807  | -1.663986302 |
| 0.006942608 | -1.667560549 |
| 0.006957271 | -1.669819885 |
| 0.006992396 | -1.675408679 |
| 0.00702225  | -1.680700375 |
| 0.007089584 | -1.691925808 |
| 0.007131615 | -1.698311538 |
| 0.007147727 | -1.700702789 |
| 0.007152303 | -1.701609063 |
| 0.007155344 | -1.702954402 |
| 0.007207018 | -1.711151653 |
| 0.007210536 | -1.711917166 |
| 0.007251526 | -1.718074078 |
| 0.007275383 | -1.721406979 |
| 0.00728116  | -1.722769343 |
| 0.007323474 | -1.728406132 |
| 0.007336445 | -1.730347281 |
| 0.00740941  | -1.741012864 |
| 0.00743398  | -1.745833049 |
| 0.00743398  | -1.746467859 |
| 0.00743398  | -1.746540295 |
| 0.00743398  | -1.747204675 |
| 0.007445711 | -1.749281207 |
| 0.007492917 | -1.755396068 |
| 0.007499191 | -1.756792875 |
| 0.00752183  | -1.760501056 |
| 0.007618304 | -1.774076226 |
| 0.007635046 | -1.776403373 |
| 0.007705511 | -1.787332036 |
| 0.007778035 | -1.800175597 |
| 0.007860083 | -1.811920305 |
| 0.007860083 | -1.81207901  |
| 0.007876216 | -1.814268947 |
| 0.007893957 | -1.816641807 |
| 0.007896405 | -1.81723563  |
| 0.007916393 | -1.819863138 |
| 0.007968213 | -1.828008279 |
| 0.008007945 | -1.833375039 |
| 0.008071433 | -1.84324598  |
| 0.008073236 | -1.84524246  |

|             |              |
|-------------|--------------|
| 0.008078142 | -1.84641257  |
| 0.008081881 | -1.847143259 |
| 0.008104046 | -1.850572436 |
| 0.008212769 | -1.864009241 |
| 0.008217178 | -1.865001749 |
| 0.008217178 | -1.865112162 |
| 0.008244078 | -1.869152271 |
| 0.008244078 | -1.869327986 |
| 0.008271745 | -1.873007659 |
| 0.008322742 | -1.879369489 |
| 0.008322742 | -1.879552823 |
| 0.008362488 | -1.88447325  |
| 0.008362488 | -1.884830395 |
| 0.008402791 | -1.889842932 |
| 0.008410705 | -1.891009087 |
| 0.008474494 | -1.89975082  |
| 0.008487841 | -1.901495237 |
| 0.008512482 | -1.905058928 |
| 0.008524475 | -1.906651034 |
| 0.008557131 | -1.910809009 |
| 0.00856076  | -1.91175065  |
| 0.008647029 | -1.922139969 |
| 0.008647537 | -1.922495457 |
| 0.008677437 | -1.925957436 |
| 0.00868529  | -1.927087117 |
| 0.008742703 | -1.934830079 |
| 0.008768711 | -1.937945761 |
| 0.008775904 | -1.938997018 |
| 0.008850925 | -1.947389598 |
| 0.008894706 | -1.952806321 |
| 0.008911352 | -1.956016519 |
| 0.008991308 | -1.966882283 |
| 0.008998809 | -1.968540729 |
| 0.009038177 | -1.972833081 |
| 0.009186626 | -1.990119049 |
| 0.00921829  | -1.993860854 |
| 0.009318988 | -2.005578287 |
| 0.009327517 | -2.007181319 |
| 0.009333382 | -2.008175007 |
| 0.009408553 | -2.016398057 |
| 0.009427154 | -2.018795275 |
| 0.009433275 | -2.020270558 |
| 0.009494512 | -2.028844652 |
| 0.009536332 | -2.03403921  |
| 0.00957052  | -2.03760429  |
| 0.00957692  | -2.038509197 |
| 0.00959446  | -2.041466826 |
| 0.00959446  | -2.041472645 |
| 0.009626663 | -2.045269946 |
| 0.009626663 | -2.04529861  |
| 0.009632509 | -2.046603967 |
| 0.009660245 | -2.04994555  |
| 0.009699226 | -2.054503204 |

|             |              |
|-------------|--------------|
| 0.009718852 | -2.056642712 |
| 0.009722509 | -2.057278637 |
| 0.009729606 | -2.058821335 |
| 0.009743232 | -2.060889792 |
| 0.009772841 | -2.064039234 |
| 0.009786103 | -2.065861076 |
| 0.009840203 | -2.072398727 |
| 0.009844961 | -2.073666454 |
| 0.009889108 | -2.07833454  |
| 0.009894423 | -2.079115577 |
| 0.009932293 | -2.084344428 |
| 0.010124789 | -2.103610945 |
| 0.010175776 | -2.109064076 |
| 0.01023056  | -2.114255082 |
| 0.01032262  | -2.123298632 |
| 0.010351493 | -2.126424641 |
| 0.010358463 | -2.127394052 |
| 0.010358463 | -2.127614943 |
| 0.0103599   | -2.128303584 |
| 0.010376076 | -2.130028868 |
| 0.010408111 | -2.133704792 |
| 0.010510699 | -2.144378274 |
| 0.010513758 | -2.145217078 |
| 0.010585474 | -2.152559709 |
| 0.010585474 | -2.152565512 |
| 0.010618639 | -2.155705848 |
| 0.010705466 | -2.164278937 |
| 0.010718649 | -2.1656872   |
| 0.010753157 | -2.169190231 |
| 0.010782019 | -2.172205827 |
| 0.010799238 | -2.173946529 |
| 0.010809042 | -2.175059219 |
| 0.010839513 | -2.17791175  |
| 0.010855879 | -2.179857291 |
| 0.010856589 | -2.180201567 |
| 0.010923557 | -2.186734114 |
| 0.010923557 | -2.187515649 |
| 0.010954434 | -2.190941329 |
| 0.01095795  | -2.191517679 |
| 0.010961753 | -2.192684564 |
| 0.010995666 | -2.195784644 |
| 0.010997256 | -2.196287135 |
| 0.010997256 | -2.196482835 |
| 0.011001722 | -2.197136042 |
| 0.011028868 | -2.200318706 |
| 0.011028868 | -2.200514317 |
| 0.011038492 | -2.201874668 |
| 0.011053839 | -2.204270452 |
| 0.01108668  | -2.20725708  |
| 0.011177148 | -2.215792781 |
| 0.011209949 | -2.219026906 |
| 0.011211667 | -2.219447974 |
| 0.011275857 | -2.225589584 |



|             |              |
|-------------|--------------|
| 0.011275857 | -2.225775874 |
| 0.011286645 | -2.226928261 |
| 0.011289189 | -2.227414527 |
| 0.011299558 | -2.228812539 |
| 0.011304999 | -2.229812261 |
| 0.011489372 | -2.246513828 |
| 0.011502668 | -2.247847303 |
| 0.011520487 | -2.249575321 |
| 0.011520487 | -2.249816583 |
| 0.011554196 | -2.253595504 |
| 0.011590217 | -2.256989036 |
| 0.011594708 | -2.257899644 |
| 0.011600025 | -2.258595921 |
| 0.011710973 | -2.268380079 |
| 0.011757175 | -2.272451105 |
| 0.011758352 | -2.273015335 |
| 0.011789126 | -2.276017643 |
| 0.011792606 | -2.277210965 |
| 0.011792606 | -2.277535045 |
| 0.011792606 | -2.278066007 |
| 0.011802102 | -2.27996322  |
| 0.011802102 | -2.280156936 |
| 0.01186213  | -2.286435475 |
| 0.011925823 | -2.293518045 |
| 0.011927644 | -2.294102511 |
| 0.011927644 | -2.294207983 |
| 0.012027025 | -2.302862042 |
| 0.012046656 | -2.304882832 |
| 0.012153736 | -2.314049267 |
| 0.012183298 | -2.31763139  |
| 0.01227427  | -2.326590081 |
| 0.012303018 | -2.329220033 |
| 0.012303018 | -2.329321736 |
| 0.012308477 | -2.330305276 |
| 0.012335666 | -2.333313655 |
| 0.01234062  | -2.334224051 |
| 0.01235856  | -2.335818057 |
| 0.01236859  | -2.336828439 |
| 0.012405709 | -2.3406429   |
| 0.012426299 | -2.342695198 |
| 0.012459986 | -2.34624418  |
| 0.012486698 | -2.348463458 |
| 0.012586031 | -2.356483576 |
| 0.012605455 | -2.358969605 |
| 0.012653486 | -2.362698736 |
| 0.012675945 | -2.365393149 |
| 0.01267629  | -2.365688158 |
| 0.012713622 | -2.368902278 |
| 0.012737766 | -2.371177039 |
| 0.012737766 | -2.37170686  |
| 0.012784916 | -2.375335657 |
| 0.012800016 | -2.376947853 |
| 0.012994261 | -2.392253695 |

|             |              |
|-------------|--------------|
| 0.01311608  | -2.401540223 |
| 0.013125685 | -2.402742506 |
| 0.013127125 | -2.403110588 |
| 0.013146452 | -2.404715806 |
| 0.013147205 | -2.40503613  |
| 0.01325822  | -2.414016151 |
| 0.01325855  | -2.414306489 |
| 0.013263056 | -2.414882868 |
| 0.013271514 | -2.415997053 |
| 0.013302981 | -2.418415953 |
| 0.013314379 | -2.419728575 |
| 0.013357164 | -2.423444273 |
| 0.013392364 | -2.426368586 |
| 0.013394112 | -2.426753903 |
| 0.013404946 | -2.428021531 |
| 0.013441729 | -2.431575908 |
| 0.013457768 | -2.432925165 |
| 0.013486158 | -2.435637048 |
| 0.013520134 | -2.438187982 |
| 0.013545477 | -2.440685656 |
| 0.013564011 | -2.442192842 |
| 0.013583728 | -2.443777311 |
| 0.013637025 | -2.44759839  |
| 0.013665583 | -2.450028297 |
| 0.013673573 | -2.451226124 |
| 0.013673573 | -2.451353901 |
| 0.013673807 | -2.451634261 |
| 0.013678691 | -2.452487922 |
| 0.013694491 | -2.454329546 |
| 0.013710517 | -2.457073153 |
| 0.013738389 | -2.459611351 |
| 0.013844263 | -2.468423701 |
| 0.013854498 | -2.46962051  |
| 0.013861434 | -2.47060052  |
| 0.013885966 | -2.473255886 |
| 0.013955835 | -2.479341638 |
| 0.013955835 | -2.479439485 |
| 0.013955835 | -2.479646172 |
| 0.014029068 | -2.485704066 |
| 0.014034795 | -2.486703244 |
| 0.014034795 | -2.487119798 |
| 0.014035388 | -2.487419241 |
| 0.014043484 | -2.488464611 |
| 0.014085397 | -2.492211679 |
| 0.014119658 | -2.494676417 |
| 0.014186613 | -2.499489191 |
| 0.014208263 | -2.501132885 |
| 0.014226463 | -2.502814578 |
| 0.014319473 | -2.510025213 |
| 0.014328171 | -2.510835676 |
| 0.01437967  | -2.514349332 |
| 0.014386715 | -2.515803228 |
| 0.014386715 | -2.515989307 |

|             |              |
|-------------|--------------|
| 0.014440868 | -2.519756755 |
| 0.014443014 | -2.520157934 |
| 0.014443014 | -2.520409504 |
| 0.014445243 | -2.520808404 |
| 0.014492445 | -2.524383973 |
| 0.014492445 | -2.524542926 |
| 0.014504819 | -2.525575365 |
| 0.014548886 | -2.529099535 |
| 0.014548886 | -2.529108103 |
| 0.014621879 | -2.534671206 |
| 0.014651898 | -2.537046368 |
| 0.014695627 | -2.54000574  |
| 0.014735204 | -2.54295908  |
| 0.014747432 | -2.544226022 |
| 0.014809692 | -2.548816559 |
| 0.014838558 | -2.550838575 |
| 0.014871492 | -2.553618909 |
| 0.014942555 | -2.558195943 |
| 0.014969528 | -2.560600247 |
| 0.015039143 | -2.566086237 |
| 0.015039932 | -2.566389896 |
| 0.01508853  | -2.570194511 |
| 0.015116635 | -2.572789665 |
| 0.015146375 | -2.574825827 |
| 0.015182347 | -2.577485539 |
| 0.015205228 | -2.579360263 |
| 0.015216835 | -2.580306651 |
| 0.015224631 | -2.581277815 |
| 0.015224631 | -2.581535572 |
| 0.015325312 | -2.588524558 |
| 0.015329963 | -2.589053908 |
| 0.015380309 | -2.592532179 |
| 0.015421523 | -2.596642387 |
| 0.015421523 | -2.596987869 |
| 0.015473723 | -2.60055515  |
| 0.015484964 | -2.601466215 |
| 0.015513687 | -2.603397697 |
| 0.015517665 | -2.603883182 |
| 0.015651533 | -2.613202146 |
| 0.015651533 | -2.613431684 |
| 0.015656389 | -2.613965242 |
| 0.015668843 | -2.6149378   |
| 0.015679415 | -2.615801009 |
| 0.015733716 | -2.620192447 |
| 0.01578533  | -2.623409104 |
| 0.015839445 | -2.627262607 |
| 0.01585886  | -2.628623089 |
| 0.015865566 | -2.629257501 |
| 0.015895379 | -2.631459832 |
| 0.015942042 | -2.634364109 |
| 0.016029189 | -2.641808513 |
| 0.016189562 | -2.651851131 |
| 0.016189562 | -2.652016462 |

|             |              |
|-------------|--------------|
| 0.016206712 | -2.653526588 |
| 0.016254762 | -2.657857451 |
| 0.016254762 | -2.657954407 |
| 0.016300277 | -2.661232395 |
| 0.016421953 | -2.669544922 |
| 0.016421953 | -2.669703071 |
| 0.016441185 | -2.671529945 |
| 0.016463777 | -2.674489556 |
| 0.016518081 | -2.678955487 |
| 0.016760217 | -2.694586003 |
| 0.016803899 | -2.698980163 |
| 0.016808729 | -2.699715259 |
| 0.016825834 | -2.701077828 |
| 0.016880808 | -2.704272002 |
| 0.017020293 | -2.713183807 |
| 0.017111472 | -2.71874792  |
| 0.017143509 | -2.721174056 |
| 0.017152616 | -2.723124376 |
| 0.017314945 | -2.733100831 |
| 0.017357879 | -2.735826312 |
| 0.01740421  | -2.738478009 |
| 0.017495392 | -2.744417081 |
| 0.017539093 | -2.746913583 |
| 0.017589349 | -2.750715188 |
| 0.017591336 | -2.75120027  |
| 0.017591336 | -2.751303902 |
| 0.017605594 | -2.752521866 |
| 0.017702777 | -2.759677304 |
| 0.017757217 | -2.763176378 |
| 0.017849187 | -2.768596228 |
| 0.01789128  | -2.771659753 |
| 0.018019736 | -2.779082806 |
| 0.018067239 | -2.781699947 |
| 0.018119789 | -2.784561998 |
| 0.01814014  | -2.785816182 |
| 0.018194057 | -2.788735144 |
| 0.018269936 | -2.793454209 |
| 0.018292766 | -2.794821699 |
| 0.018417508 | -2.802396009 |
| 0.018526343 | -2.808190761 |
| 0.018728075 | -2.8196372   |
| 0.018758712 | -2.82159042  |
| 0.018765533 | -2.822157825 |
| 0.018941585 | -2.832490527 |
| 0.018990738 | -2.835543404 |
| 0.019024019 | -2.837360399 |
| 0.019033521 | -2.838049173 |
| 0.019064595 | -2.839758097 |
| 0.019194207 | -2.846818193 |
| 0.019377822 | -2.857494192 |
| 0.019389    | -2.858771433 |
| 0.019389887 | -2.859117025 |
| 0.019452711 | -2.86291359  |

|             |              |
|-------------|--------------|
| 0.0194601   | -2.863492876 |
| 0.019543846 | -2.868776271 |
| 0.019543846 | -2.868782584 |
| 0.019594045 | -2.872984804 |
| 0.01961796  | -2.875358185 |
| 0.019631704 | -2.876601724 |
| 0.019687294 | -2.879619429 |
| 0.019736928 | -2.882557446 |
| 0.019736928 | -2.882593228 |
| 0.019754842 | -2.883880727 |
| 0.019759325 | -2.884320239 |
| 0.019796869 | -2.88720446  |
| 0.019827533 | -2.888832827 |
| 0.0198932   | -2.892044413 |
| 0.019931403 | -2.894240908 |
| 0.02005229  | -2.90038763  |
| 0.020151584 | -2.905536388 |
| 0.020504391 | -2.923725995 |
| 0.020567226 | -2.92708631  |
| 0.020620843 | -2.930041424 |
| 0.020620843 | -2.930452929 |
| 0.020629536 | -2.931064963 |
| 0.020644015 | -2.931928913 |
| 0.020798495 | -2.940030096 |
| 0.020847515 | -2.94284419  |
| 0.020854434 | -2.943374782 |
| 0.020895147 | -2.945360831 |
| 0.020903367 | -2.946314007 |
| 0.021033091 | -2.952491016 |
| 0.021234886 | -2.964721008 |
| 0.021298544 | -2.968794811 |
| 0.021446161 | -2.9765244   |
| 0.021481057 | -2.978533893 |
| 0.02162561  | -2.985478881 |
| 0.021660589 | -2.987733673 |
| 0.021660589 | -2.987848455 |
| 0.021753945 | -2.992178155 |
| 0.021753945 | -2.992399639 |
| 0.021787388 | -2.994008642 |
| 0.021799561 | -2.994968299 |
| 0.021808232 | -2.99555435  |
| 0.021910709 | -3.000583974 |
| 0.021910709 | -3.000679991 |
| 0.021922328 | -3.001384682 |
| 0.0220747   | -3.008518808 |
| 0.022142252 | -3.011735853 |
| 0.022142252 | -3.012174994 |
| 0.022235865 | -3.016874567 |
| 0.022331785 | -3.021194516 |
| 0.022609857 | -3.035782418 |
| 0.022609857 | -3.03593591  |
| 0.022619282 | -3.036536515 |
| 0.02266026  | -3.038613814 |

|             |              |
|-------------|--------------|
| 0.0227521   | -3.042469875 |
| 0.022811014 | -3.045469052 |
| 0.022831888 | -3.04674192  |
| 0.022835855 | -3.047133891 |
| 0.022835855 | -3.047349723 |
| 0.022975726 | -3.054839659 |
| 0.023011067 | -3.056913411 |
| 0.023024374 | -3.057657136 |
| 0.023110561 | -3.062528342 |
| 0.023110561 | -3.062582853 |
| 0.023199485 | -3.066925529 |
| 0.023264219 | -3.070321771 |
| 0.023334072 | -3.074130516 |
| 0.023428644 | -3.078205007 |
| 0.023453948 | -3.079591019 |
| 0.023548092 | -3.083435454 |
| 0.023573774 | -3.084859691 |
| 0.023584485 | -3.085610693 |
| 0.023584485 | -3.085767969 |
| 0.02369111  | -3.091319147 |
| 0.023794673 | -3.095897195 |
| 0.023807895 | -3.096617795 |
| 0.023825179 | -3.097754362 |
| 0.023872475 | -3.100380455 |
| 0.024063704 | -3.108558067 |
| 0.024109968 | -3.110699854 |
| 0.024152511 | -3.113050401 |
| 0.024176203 | -3.114150443 |
| 0.024260009 | -3.118136576 |
| 0.024290669 | -3.119790033 |
| 0.024290669 | -3.11993193  |
| 0.024301003 | -3.120534125 |
| 0.024355511 | -3.123063879 |
| 0.024355511 | -3.123646141 |
| 0.02443897  | -3.128034223 |
| 0.024459358 | -3.129438009 |
| 0.024459358 | -3.129442392 |
| 0.02455666  | -3.133272087 |
| 0.02455666  | -3.133438435 |
| 0.024676319 | -3.138231387 |
| 0.024805995 | -3.144902576 |
| 0.024994834 | -3.152349755 |
| 0.025057453 | -3.155247173 |
| 0.025071691 | -3.155974798 |
| 0.025135472 | -3.158905835 |
| 0.025154105 | -3.159802119 |
| 0.025154105 | -3.160006837 |
| 0.025181794 | -3.161647695 |
| 0.025430733 | -3.171655914 |
| 0.025430733 | -3.172197289 |
| 0.025470667 | -3.174502233 |
| 0.025470667 | -3.174691396 |
| 0.025492703 | -3.175682938 |

|             |              |
|-------------|--------------|
| 0.025572169 | -3.179120427 |
| 0.025583379 | -3.179947755 |
| 0.025617368 | -3.181352878 |
| 0.025717209 | -3.185484311 |
| 0.025833499 | -3.189953791 |
| 0.025841903 | -3.190461863 |
| 0.025847898 | -3.191371396 |
| 0.025913334 | -3.194449004 |
| 0.026040036 | -3.19967673  |
| 0.026136774 | -3.204290014 |
| 0.026208821 | -3.207183085 |
| 0.026284229 | -3.210830897 |
| 0.026290028 | -3.211264176 |
| 0.026290028 | -3.211640258 |
| 0.026441957 | -3.217053712 |
| 0.026512604 | -3.221363128 |
| 0.026613934 | -3.22498681  |
| 0.026651039 | -3.226446626 |
| 0.026686737 | -3.228287147 |
| 0.026723359 | -3.229941765 |
| 0.026784296 | -3.232405842 |
| 0.026808034 | -3.233519759 |
| 0.026869581 | -3.236103461 |
| 0.026878561 | -3.236691369 |
| 0.026905984 | -3.238343102 |
| 0.026977066 | -3.241168326 |
| 0.027019084 | -3.242772267 |
| 0.027112708 | -3.246716583 |
| 0.027206778 | -3.250023172 |
| 0.027283319 | -3.253172243 |
| 0.027339639 | -3.255440152 |
| 0.02777896  | -3.271937778 |
| 0.02777896  | -3.272013053 |
| 0.027812354 | -3.273297867 |
| 0.027824875 | -3.274124635 |
| 0.028041116 | -3.281669876 |
| 0.028122046 | -3.284887477 |
| 0.028122046 | -3.285317735 |
| 0.028122046 | -3.28538604  |
| 0.028128242 | -3.285922502 |
| 0.028136984 | -3.286623441 |
| 0.028283771 | -3.292323622 |
| 0.028298837 | -3.293010152 |
| 0.028345364 | -3.295743394 |
| 0.028362523 | -3.296494299 |
| 0.02838702  | -3.297686425 |
| 0.028400594 | -3.298323781 |
| 0.028504942 | -3.302437891 |
| 0.028557289 | -3.304495411 |
| 0.028614213 | -3.30690275  |
| 0.028718041 | -3.310973649 |
| 0.028782006 | -3.314217725 |
| 0.028890037 | -3.318187086 |

|             |              |
|-------------|--------------|
| 0.028924875 | -3.31962285  |
| 0.029000138 | -3.322625789 |
| 0.029207442 | -3.330230003 |
| 0.029453468 | -3.338540483 |
| 0.029639526 | -3.346236868 |
| 0.02974615  | -3.35031607  |
| 0.02974615  | -3.350476653 |
| 0.029779804 | -3.35169186  |
| 0.02993774  | -3.356818673 |
| 0.030128781 | -3.363521895 |
| 0.03018883  | -3.365502304 |
| 0.03019375  | -3.365854963 |
| 0.030227128 | -3.367163406 |
| 0.030227128 | -3.367253624 |
| 0.030326043 | -3.370991462 |
| 0.030670786 | -3.3827087   |
| 0.030686141 | -3.383360854 |
| 0.030703904 | -3.3844958   |
| 0.030802204 | -3.388238816 |
| 0.030802204 | -3.388372364 |
| 0.030803806 | -3.388741197 |
| 0.030837881 | -3.390433271 |
| 0.030913923 | -3.393036542 |
| 0.031030104 | -3.396991394 |
| 0.031042087 | -3.397540621 |
| 0.031044597 | -3.398084516 |
| 0.031044597 | -3.398229546 |
| 0.031112772 | -3.401143942 |
| 0.031135281 | -3.402127652 |
| 0.031223308 | -3.405388627 |
| 0.031227019 | -3.405699379 |
| 0.031230349 | -3.406204163 |
| 0.031535368 | -3.41587126  |
| 0.031757313 | -3.4239462   |
| 0.031846229 | -3.426635753 |
| 0.031860885 | -3.427248847 |
| 0.032219767 | -3.439241657 |
| 0.032271557 | -3.441075737 |
| 0.032290966 | -3.441813372 |
| 0.032295399 | -3.442138729 |
| 0.032423215 | -3.446867112 |
| 0.032482113 | -3.449088266 |
| 0.032533556 | -3.450899677 |
| 0.032589418 | -3.452626384 |
| 0.032625747 | -3.454467274 |
| 0.032712456 | -3.457391177 |
| 0.032827486 | -3.46149367  |
| 0.032827486 | -3.461519803 |
| 0.032874335 | -3.463233904 |
| 0.033043888 | -3.468969396 |
| 0.033246504 | -3.475807112 |
| 0.033296519 | -3.47734283  |
| 0.033441506 | -3.481674968 |



|             |              |
|-------------|--------------|
| 0.033574032 | -3.487522666 |
| 0.033582019 | -3.487979674 |
| 0.033582019 | -3.488134843 |
| 0.03374432  | -3.493615096 |
| 0.033752629 | -3.494033715 |
| 0.033808164 | -3.495892531 |
| 0.034054069 | -3.503121462 |
| 0.034100793 | -3.504537459 |
| 0.034229764 | -3.509482217 |
| 0.034268648 | -3.510887792 |
| 0.034337321 | -3.512959541 |
| 0.034374685 | -3.514225194 |
| 0.034518784 | -3.518133616 |
| 0.034537039 | -3.518801442 |
| 0.034670919 | -3.522828445 |
| 0.034715306 | -3.524360316 |
| 0.034742068 | -3.52544087  |
| 0.034775747 | -3.526697054 |
| 0.034801494 | -3.527551662 |
| 0.034814979 | -3.528490418 |
| 0.034816443 | -3.528726079 |
| 0.034822548 | -3.529079796 |
| 0.034884983 | -3.531528404 |
| 0.034884983 | -3.532066477 |
| 0.035167797 | -3.541384643 |
| 0.035689253 | -3.556789217 |
| 0.035979495 | -3.565731335 |
| 0.036150003 | -3.571290742 |
| 0.036182883 | -3.572746524 |
| 0.036182883 | -3.572879366 |
| 0.036211948 | -3.573786021 |
| 0.03627283  | -3.57546886  |
| 0.036717259 | -3.588201856 |
| 0.036782775 | -3.589974548 |
| 0.036826104 | -3.59160162  |
| 0.036894786 | -3.594030034 |
| 0.036957481 | -3.596700528 |
| 0.03695766  | -3.596899408 |
| 0.036983706 | -3.597762582 |
| 0.037030742 | -3.600033259 |
| 0.037228074 | -3.606260957 |
| 0.037315886 | -3.609311538 |
| 0.037320826 | -3.609817493 |
| 0.037349783 | -3.610997014 |
| 0.037426986 | -3.613103058 |
| 0.037482448 | -3.614605703 |
| 0.037516544 | -3.615953807 |
| 0.037516544 | -3.616467895 |
| 0.037563565 | -3.618254982 |
| 0.037579322 | -3.618818647 |
| 0.037692111 | -3.621660834 |
| 0.037771808 | -3.623913454 |
| 0.037941931 | -3.629040851 |

|             |              |
|-------------|--------------|
| 0.038047351 | -3.631893362 |
| 0.038114523 | -3.634056379 |
| 0.038114523 | -3.634205438 |
| 0.038190596 | -3.63615947  |
| 0.038196832 | -3.636644368 |
| 0.03819866  | -3.6369221   |
| 0.038210711 | -3.637392773 |
| 0.038212667 | -3.637629887 |
| 0.038261663 | -3.63895392  |
| 0.038359233 | -3.641779322 |
| 0.038670568 | -3.650643175 |
| 0.038682555 | -3.651299341 |
| 0.038817513 | -3.654795098 |
| 0.039042497 | -3.661959712 |
| 0.039063798 | -3.662822338 |
| 0.039452511 | -3.672514975 |
| 0.039502378 | -3.673820098 |
| 0.03951198  | -3.674414887 |
| 0.039541633 | -3.67526706  |
| 0.039810769 | -3.682961694 |
| 0.039862947 | -3.684306986 |
| 0.039936189 | -3.686684561 |
| 0.039950422 | -3.68718834  |
| 0.040006065 | -3.688984132 |
| 0.040098289 | -3.69120461  |
| 0.040222577 | -3.695068774 |
| 0.040443973 | -3.70073163  |
| 0.040443973 | -3.700788704 |
| 0.040835048 | -3.711614045 |
| 0.040835048 | -3.711975936 |
| 0.041074896 | -3.718453459 |
| 0.041159988 | -3.721139513 |
| 0.041159988 | -3.721215518 |
| 0.041162593 | -3.721492394 |
| 0.041162593 | -3.721646243 |
| 0.04120869  | -3.722820028 |
| 0.041277482 | -3.724851863 |
| 0.041356977 | -3.726734515 |
| 0.041370653 | -3.727400179 |
| 0.041463343 | -3.729746214 |
| 0.041514572 | -3.731395    |
| 0.041589203 | -3.733724602 |
| 0.041596426 | -3.734064287 |
| 0.041608472 | -3.734662751 |
| 0.041764263 | -3.738171312 |
| 0.04182785  | -3.73988435  |
| 0.041897885 | -3.741730662 |
| 0.041996945 | -3.744450513 |
| 0.042155169 | -3.748983371 |
| 0.042202698 | -3.750347339 |
| 0.042351656 | -3.754192475 |
| 0.042630767 | -3.761014616 |
| 0.042630767 | -3.761157139 |

|             |              |
|-------------|--------------|
| 0.042842228 | -3.767109563 |
| 0.042848528 | -3.767608874 |
| 0.043131719 | -3.774513905 |
| 0.043207221 | -3.776619129 |
| 0.043379688 | -3.780848505 |
| 0.043394858 | -3.781524643 |
| 0.043456049 | -3.782948334 |
| 0.043572023 | -3.785660807 |
| 0.043578327 | -3.786326571 |
| 0.043597565 | -3.786912325 |
| 0.043674975 | -3.788840246 |
| 0.043766874 | -3.791056289 |
| 0.043824315 | -3.792393343 |
| 0.044085769 | -3.798541217 |
| 0.04415407  | -3.800085623 |
| 0.044203118 | -3.801795048 |
| 0.044476777 | -3.807769458 |
| 0.044717224 | -3.812873683 |
| 0.044719661 | -3.813104586 |
| 0.044773173 | -3.814433657 |
| 0.044977283 | -3.819043736 |
| 0.045106575 | -3.82213583  |
| 0.045206133 | -3.824437683 |
| 0.045224629 | -3.824979512 |
| 0.045284525 | -3.826506943 |
| 0.045400609 | -3.829393013 |
| 0.045400609 | -3.829484781 |
| 0.045707953 | -3.836865899 |
| 0.04592608  | -3.841409371 |
| 0.046153481 | -3.84724521  |
| 0.046153481 | -3.847379488 |
| 0.046276607 | -3.85008052  |
| 0.046288172 | -3.850481116 |
| 0.046405272 | -3.853282513 |
| 0.046431944 | -3.854108548 |
| 0.046432016 | -3.854290978 |
| 0.046873308 | -3.863675518 |
| 0.046901697 | -3.864534522 |
| 0.046901697 | -3.864568087 |
| 0.047480141 | -3.878023444 |
| 0.047720842 | -3.883536205 |
| 0.047842419 | -3.886485436 |
| 0.047926299 | -3.888379998 |
| 0.047988637 | -3.889976192 |
| 0.048360847 | -3.899560216 |
| 0.048360847 | -3.899693592 |
| 0.048406683 | -3.90088104  |
| 0.048644758 | -3.906071884 |
| 0.048709561 | -3.907594862 |
| 0.048728793 | -3.908118982 |
| 0.048867447 | -3.910785927 |
| 0.048873854 | -3.911079037 |
| 0.04894112  | -3.912639982 |

|             |              |
|-------------|--------------|
| 0.049019092 | -3.914711667 |
| 0.049053398 | -3.915537064 |
| 0.049225594 | -3.919316973 |
| 0.049236543 | -3.920105501 |
| 0.049236543 | -3.92075545  |
| 0.049246401 | -3.921108249 |
| 0.049297362 | -3.922546084 |
| 0.049343058 | -3.923811417 |
| 0.049522398 | -3.927950796 |
| 0.049585189 | -3.929413529 |
| 0.049585189 | -3.929413911 |
| 0.049985155 | -3.93768231  |
