# Supplementary material for: Weighted Gene Correlation Network Analysis Identifies Specific Functional Modules and Genes in Esophageal Cancer
Source: J Oncol. 2021 Dec 27;2021:8223263. doi: 10.1155/2021/8223263 (PMC8723838; doi:10.1155/2021/8223263)
Supplement: Supplementary Materials — Supplementary Table 1. The detailed information of DEGs between ESCA tumors and normal tissues in TCGA cohort. Supplementary Table 2. The detailed information of DEGs between ESCA tumors and normal tissues in the GSE38129 dataset. . [file 8223263.f1.zip]

Archive with 2 entries (2 files):
- 8223263.f1/Supplementary table 1.pdf
- 8223263.f1/Supplementary table 2.pdf
